# Supplementary material for: Rh(iii)-Catalysed synthesis of cinnolinium and fluoranthenium salts using C–H activation/annulation reactions: organelle specific mitochondrial staining applications
Source: Royal Society of Chemistry journal article supplement (doi:10.1039/d1ob00376c), 2021-01-01
Supplement: d1ob00376c1.pdf [file d1ob00376c1.pdf]

**Rh(III)-catalysed synthesis of cinnolinium and  
fluoranthemium salts by using C-H activation/annulation  
reactions: Organelle specific mitochondrial staining  
application**

Sivakalai Mayakrishnan,<sup>a</sup> Masilamani Tamizmani,<sup>b</sup> Chandrasekar Balachandran,  
<sup>c</sup> Shin Aoki, <sup>c</sup> Narayanan Uma Maheswari<sup>a\*</sup>

<sup>a</sup> Organic & Bioorganic Chemistry Laboratory, CSIR-Central Leather Research Institute, Adyar, Chennai-600 020, India.

Corresponding author; 044-24437120, E-mail: [umamaheswari@clri.res.in](mailto:umamaheswari@clri.res.in)

<sup>b</sup> State Key Laboratory of Organometallic Chemistry, Shanghai Institute of Organic Chemistry, Chinese Academy of Sciences, 345 Lingling Road, Shanghai, 200032, China

<sup>c</sup> Faculty of Pharmaceutical Sciences, Tokyo University of Science, 2641 Yamazaki, Noda 278-8510, Japan

**Electronic  
Supporting Information**

## Table of Contents

|                                                                 |    |
|-----------------------------------------------------------------|----|
| 1. Parallel competitive reaction .....                          | 3  |
| 2. H to D exchange experiments .....                            | 5  |
| 3. Photoluminescence spectrum.....                              | 7  |
| 4. Copy of $^1\text{H}$ , $^{13}\text{C}$ and HRMS spectra..... | 16 |
| 5. DFT Calculations .....                                       | 56 |
| 6. Reference .....                                              | 67 |

## 1. Parallel competitive reaction

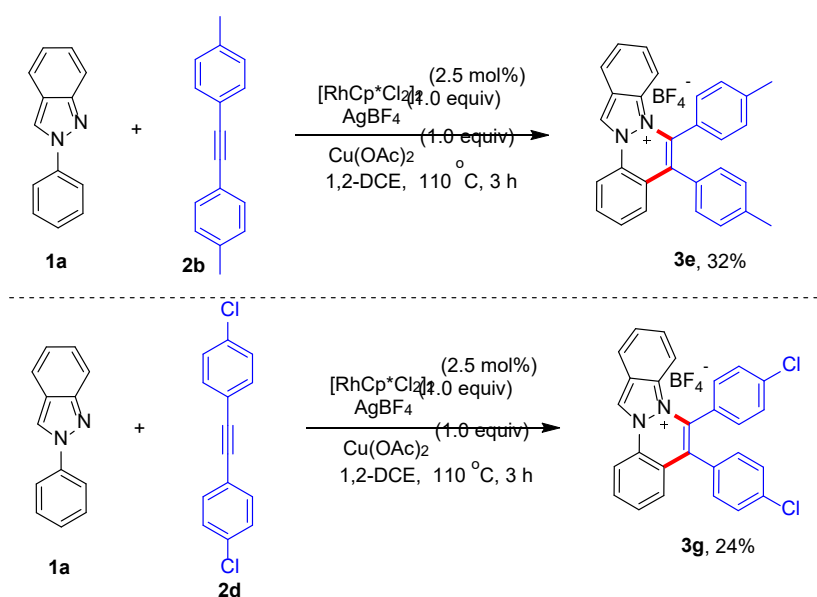

**Scheme S1**

A solution of 2-phenyl-2H-indazole **1a** (58 mg, 0.3 mmol), 1,2-di-p-tolylethyne **2b** (62 mg, 0.3 mmol),  $\text{AgBF}_4$  (58 mg 0.3 mmol),  $[\text{RhCp}^*\text{Cl}_2]_2$  (9.0 mg, 5.0 mol %), and  $\text{Cu}(\text{OAc})_2$  (54 mg 0.3 mmol) in 1,2-DCE (3 mL). The tube was sealed with a Teflon-coated screw cap and the reaction solution was heated at 110 °C for 3 hours. At the same time, another solution of 2-phenyl-2H-indazole **1a** (58 mg, 0.3 mmol), 1,2-bis(4-chlorophenyl)ethyne **2d** (74 mg, 0.3 mmol),  $\text{AgBF}_4$  (58 mg 0.3 mmol),  $[\text{RhCp}^*\text{Cl}_2]_2$  (9.0 mg, 5.0 mol %), and  $\text{Cu}(\text{OAc})_2$  (54 0.3 mmol) in 1,2-DCE (3 mL). The tube was sealed with a Teflon-coated screw cap and the reaction solution was heated at 110 °C for 3 hours. After cooling ambient temperature, the solvent was removed from both the reaction mixtures under reduced pressure and the residues of the reaction mixtures were separately purified by silica gel (100-200 mesh) column chromatography using Methanol/DCM as the eluant to afford **3e** 32% and **3g** 24% (**3e**:**3g** = ~1.3:1).

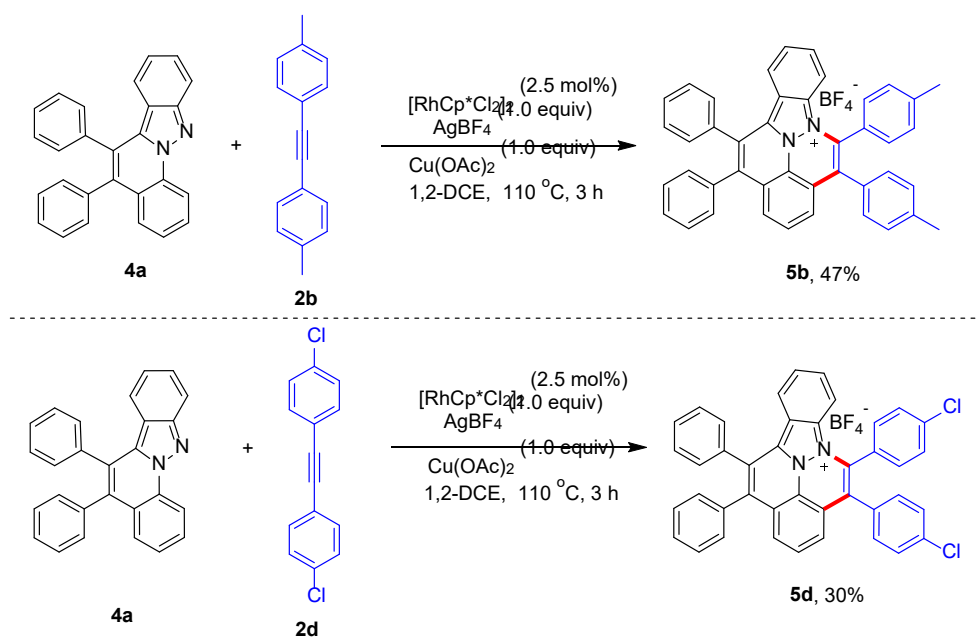

### Scheme S2

A solution of 5,6-diphenylindazolo[2,3-a]quinoline **1a** (111 mg, 0.3 mmol), 1,2-di-p-tolylethyne **2c** (61 mg, 0.3 mmol), AgBF<sub>4</sub> 58 mg (0.3 mmol), [RhCp\*Cl<sub>2</sub>]<sub>2</sub> (9 mg, 5.0 mol %), and Cu(OAc)<sub>2</sub> (0.3 mmol) in 1,2-DCE 3.0 mL. The tube was sealed with a Teflon-coated screw cap and the reaction solution was heated at 110 °C for 3 hours. At the same time, another solution of 2-phenyl-2H-indazole **1a** (111 mg, 0.3 mmol), 1,2-bis(4-chlorophenyl)ethyne **2d** (74 mg, 0.3 mmol), AgBF<sub>4</sub> 58 mg (0.3 mmol), [RhCp\*Cl<sub>2</sub>]<sub>2</sub> (9 mg, 5.0 mol %), and Cu(OAc)<sub>2</sub> (0.3 mmol) in 1,2-DCE 3 ml. The tube was sealed with a Teflon-coated screw cap and the reaction solution was heated at 110 °C for 3 hours. After cooling ambient temperature, the solvent was removed from both the reaction mixtures under reduced pressure and the residues of the reaction mixtures were separately purified by silica gel (100-200 mesh) column chromatography using Methanol/DCM as the eluant to afford **5b** 30% and **5d** 47% (**5b**:**5d** = ~1.7:1.0)



## 2. H to D exchange experiments

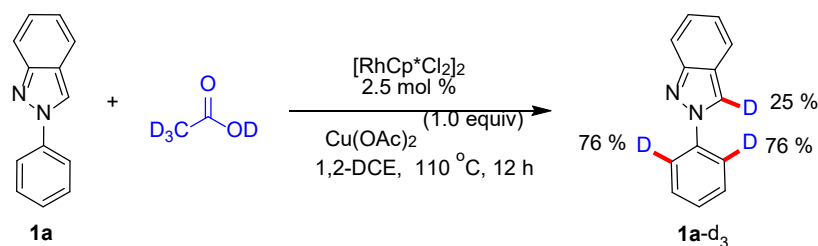

**Scheme S3**

To an oven-dried 20 mL reaction tube with septum containing were added 2-phenyl-2H-indazole **1a** 58.2 mg (0.3 mmol, 1.0 equiv),  $[\text{RhCp}^*\text{Cl}_2]_2$  (9.18 mg, 0.015 mmol, 0.05 equiv),  $\text{Cu}(\text{OAc})_2$  55.6 mg, (0.3 mmol, 1.0 equiv), Acetic acid-*d*<sub>4</sub> 0.38 ml (20.0 equiv) and 1,2-DCE 3.0 ml. The reaction mixture was heated at 110 °C for 12 h. After the reaction mixture was cooled to room temperature diluted with  $\text{CH}_2\text{Cl}_2$ , filtered through celite and the filtrate was concentrated under reduced pressure. After that, purification was performed by column chromatography on silica gel using hexane and ethyl acetate (90:10) as eluent. Desired product colourless solid **1a-d<sub>3</sub>** 52 mg was obtained in 90% of yield. The H/D exchange was found to be 76% at the protons attached to C-2 and C-5 in the recovered 2-phenyl-2H-indazole **1a-d<sub>3</sub>**. Also found H/D exchange 25% at the indazole 2-*H* position. These results also clearly reveal that the C-H bond activation as a key intermediate in the reaction as well as it is the reversible process.

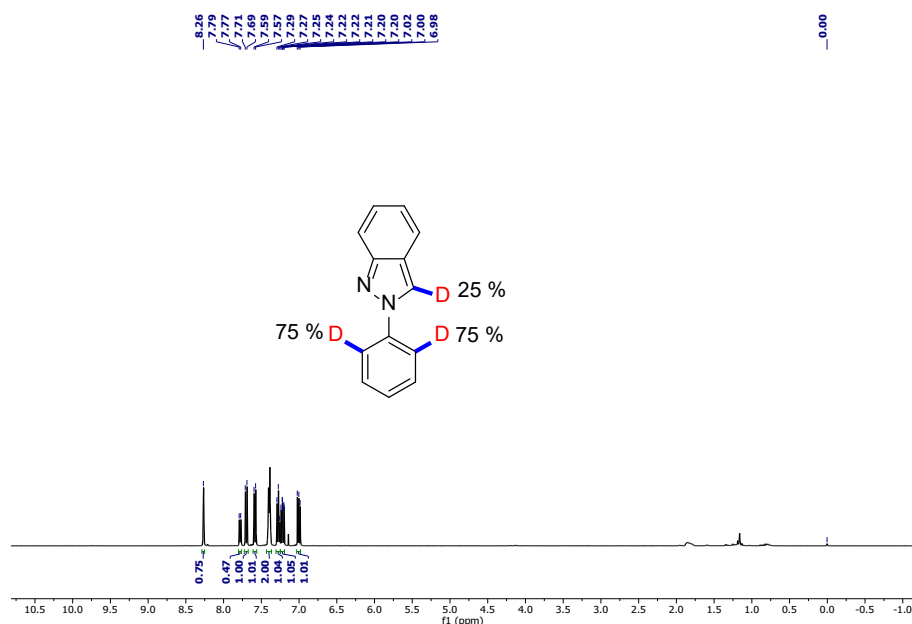

**Figure S11: Preliminary mechanistic study**

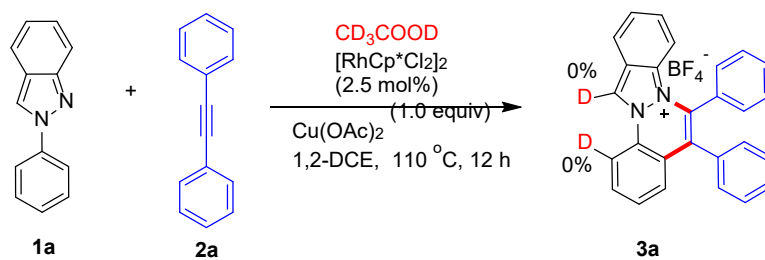

**Scheme S4**

To an oven-dried 20 mL reaction tube with septum containing were added 2-phenyl-2H-indazole **1a** 58 mg (0.3 mmol, 1.0 equiv), diphenylacetylene **2a** 52 mg (0.3 mmol),  $\text{AgBF}_4$  58 mg (0.3 mmol%),  $[\text{RhCp}^*\text{Cl}_2]_2$  (9 mg, 0.015 mmol, 0.05 equiv),  $\text{Cu(OAc)}_2$  56 mg, (0.3 mmol, 1.0 equiv), acetic acid- $d_4$  0.38 ml (20.0 equiv) and 1,2-DCE 3.0 ml. The reaction mixture was heated at 110 °C for 12 h. After the reaction mixture was cooled to room temperature diluted with  $\text{CH}_2\text{Cl}_2$ , filtered through celite and the filtrate was concentrated under reduced pressure. After that, purification was performed by column chromatography on silica gel using DCM and Methanol (95:5) as eluent. Desired product colourless solid **3a** was obtained in 78% of yield.

### 3. Photoluminescence spectrum

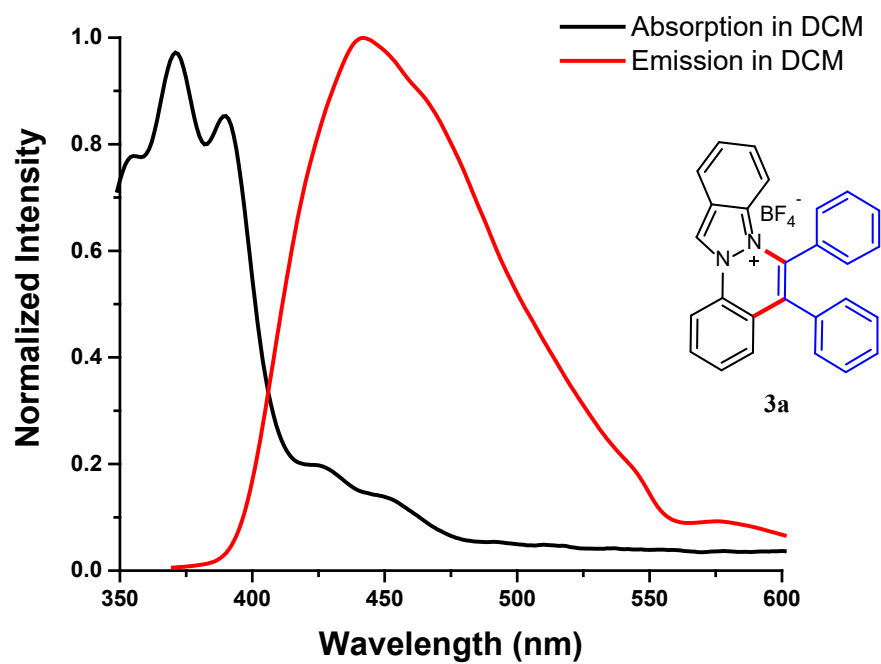

**Figure SI2:** Normalized absorption (black), Fluorescence in DCM (red) spectra of compound **3a**

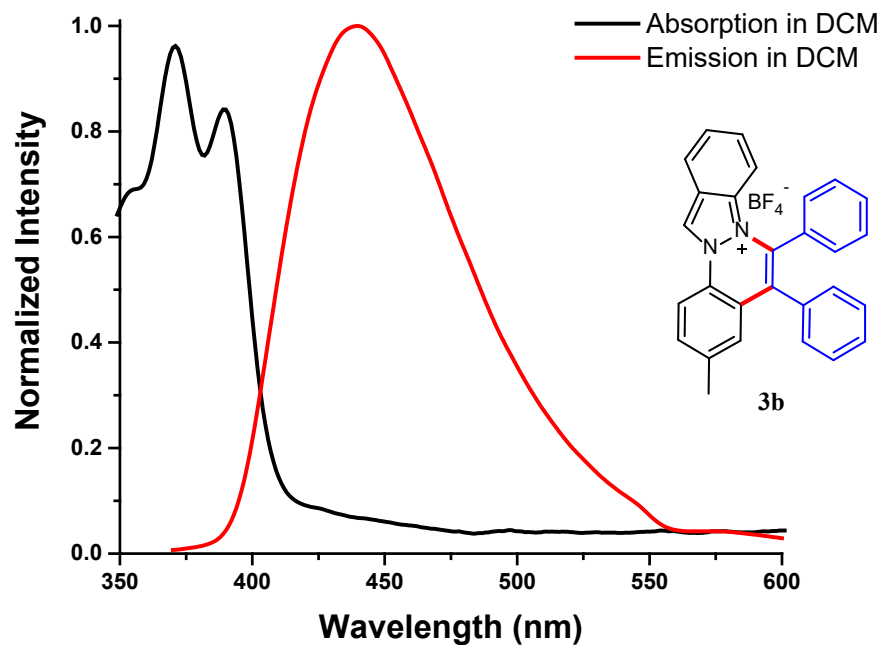

**Figure SI3:** Normalized absorption (black), Fluorescence in DCM (red) spectra of compound **3b**

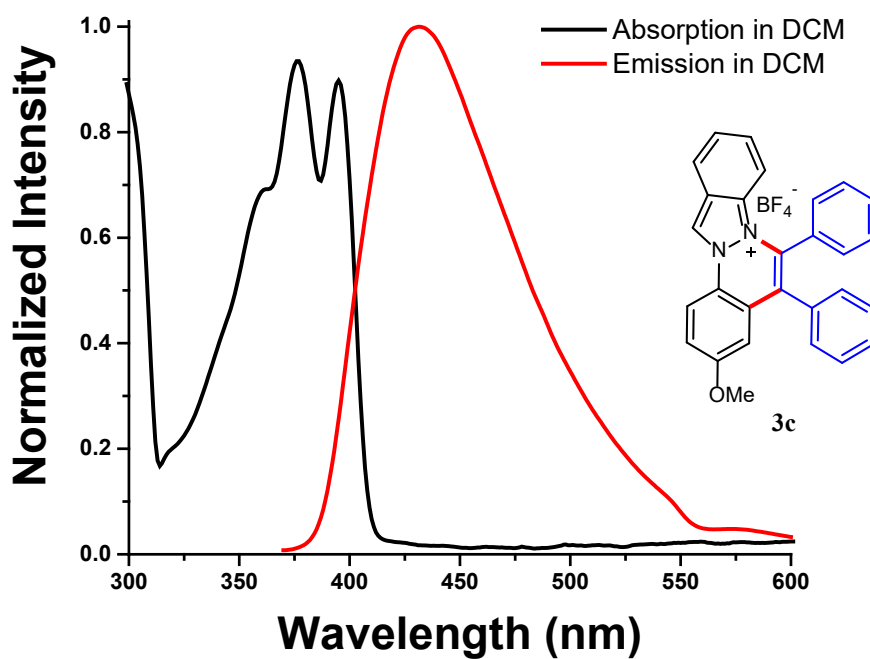

**Figure SI4:** Normalized absorption (black), Fluorescence in DCM (red) spectra of compound **3c**

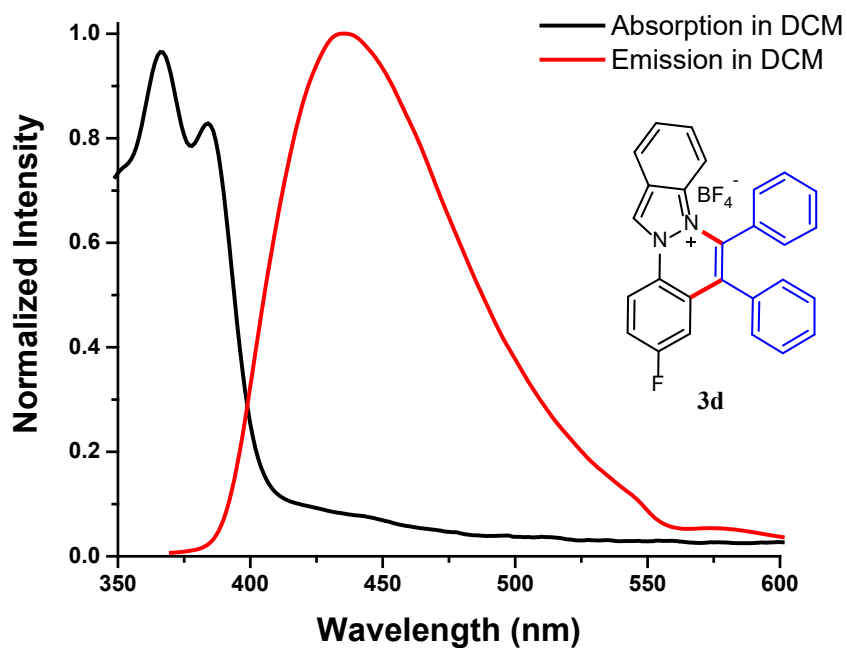

**Figure SI5:** Normalized absorption (black), Fluorescence in DCM (red) spectra of compound **3d**

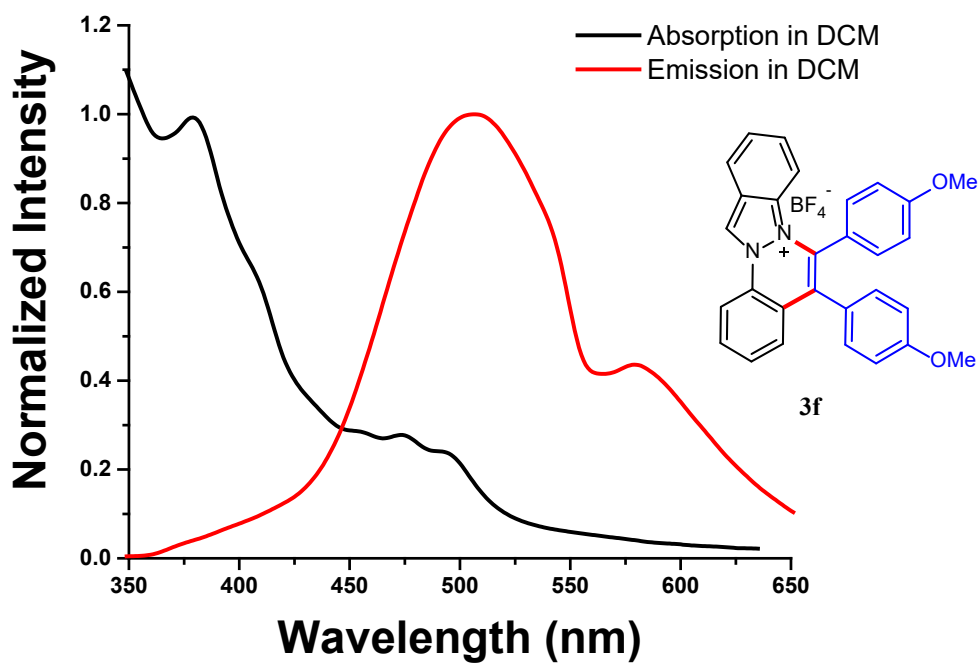

**Figure SI6:** Normalized absorption (black), Fluorescence in DCM (red) spectra of compound **3f**

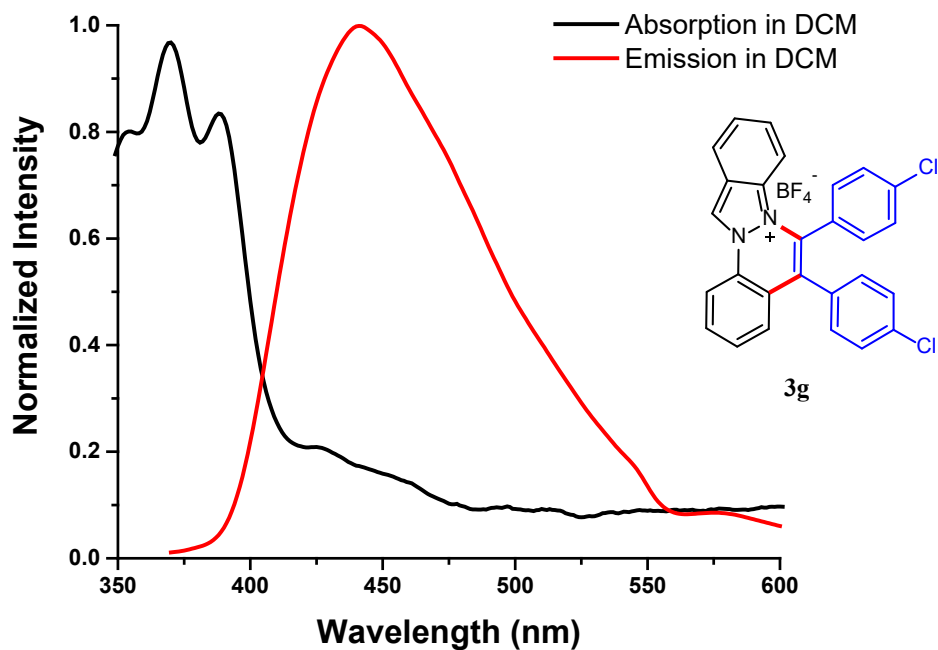

**Figure SI7:** Normalized absorption (black), Fluorescence in DCM (red) spectra of compound **4g**

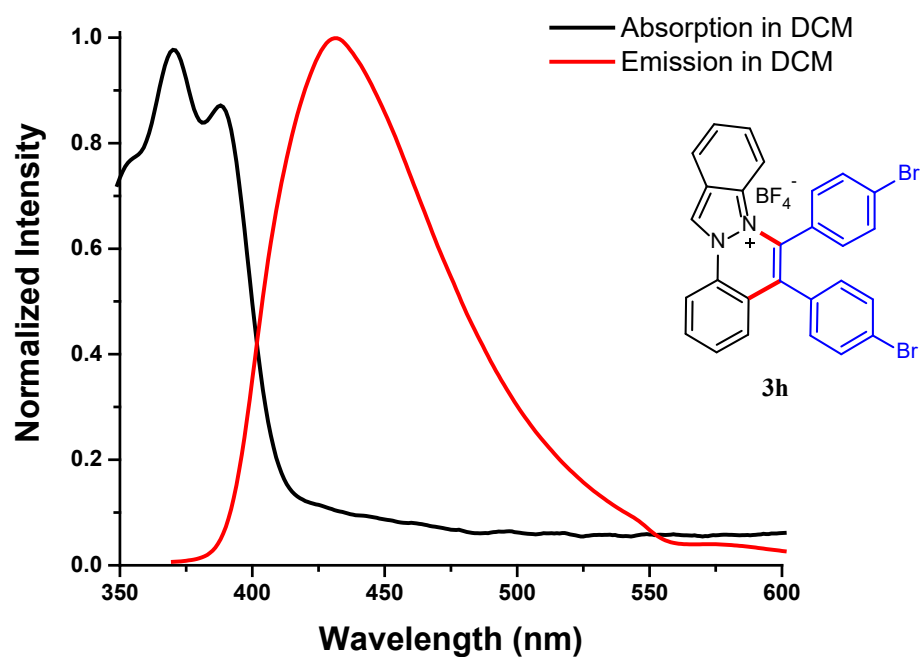

**Figure SI8:** Normalized absorption (black), Fluorescence in DCM (red) spectra of compound **3h**

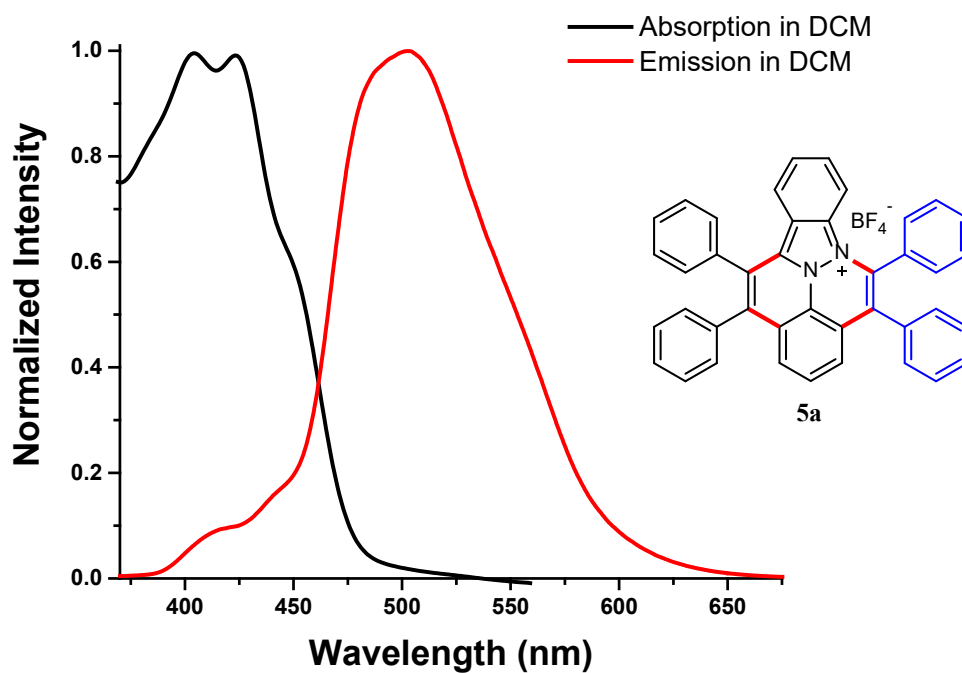

**Figure SI9:** Normalized absorption (black), Fluorescence in DCM (red) spectra of compound **5a**

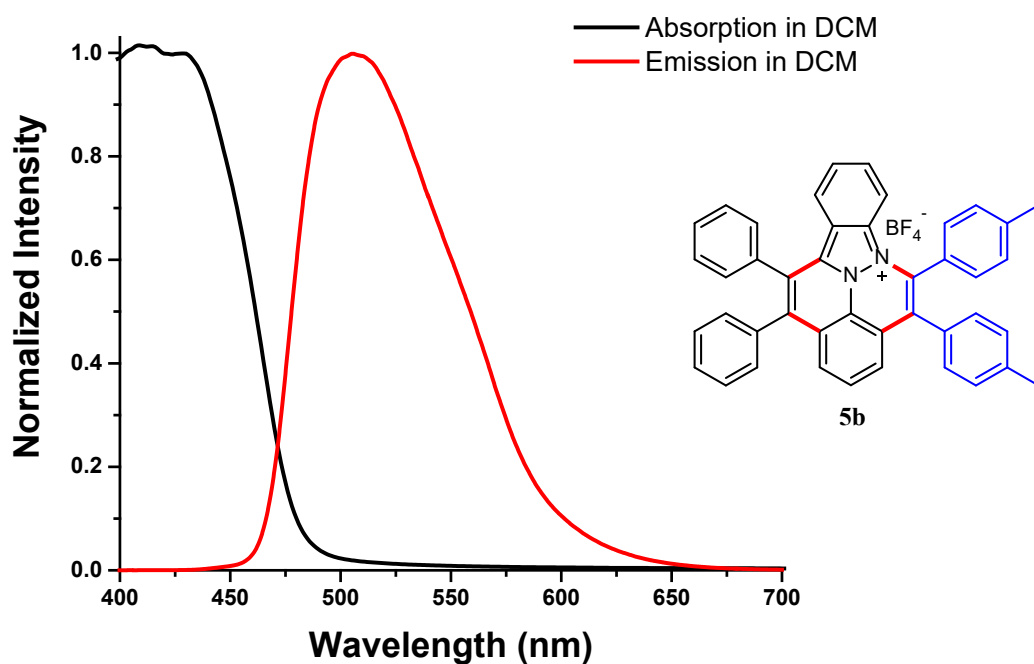

**Figure SI10:** Normalized absorption (black), Fluorescence in DCM (red) spectra of compound **5b**

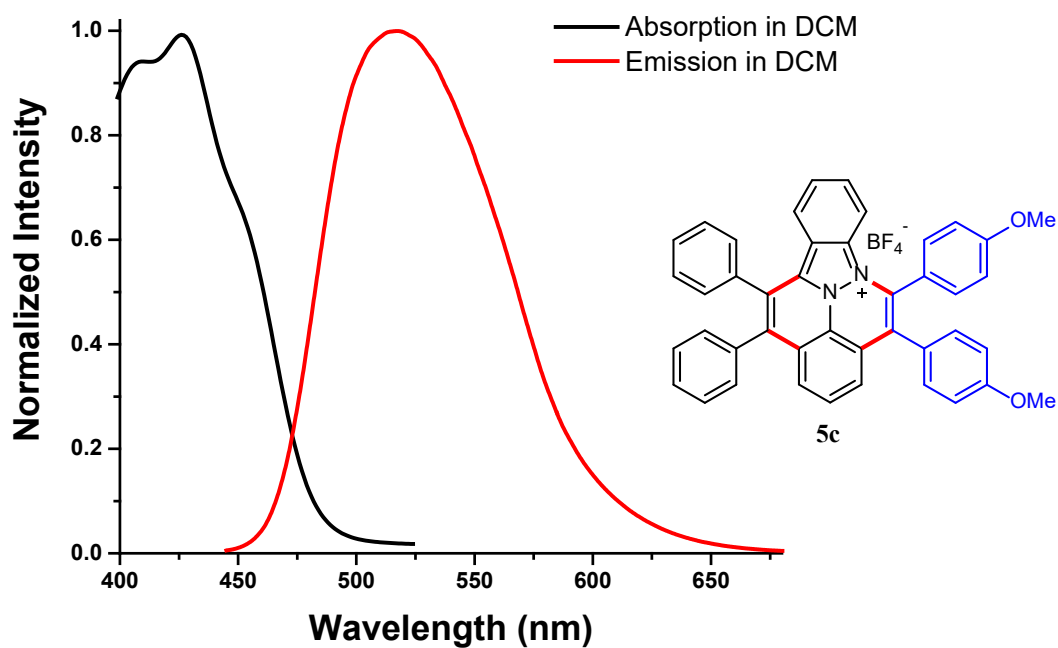

**Figure SI11:** Normalized absorption (black), Fluorescence in DCM (red) spectra of compound **5c**

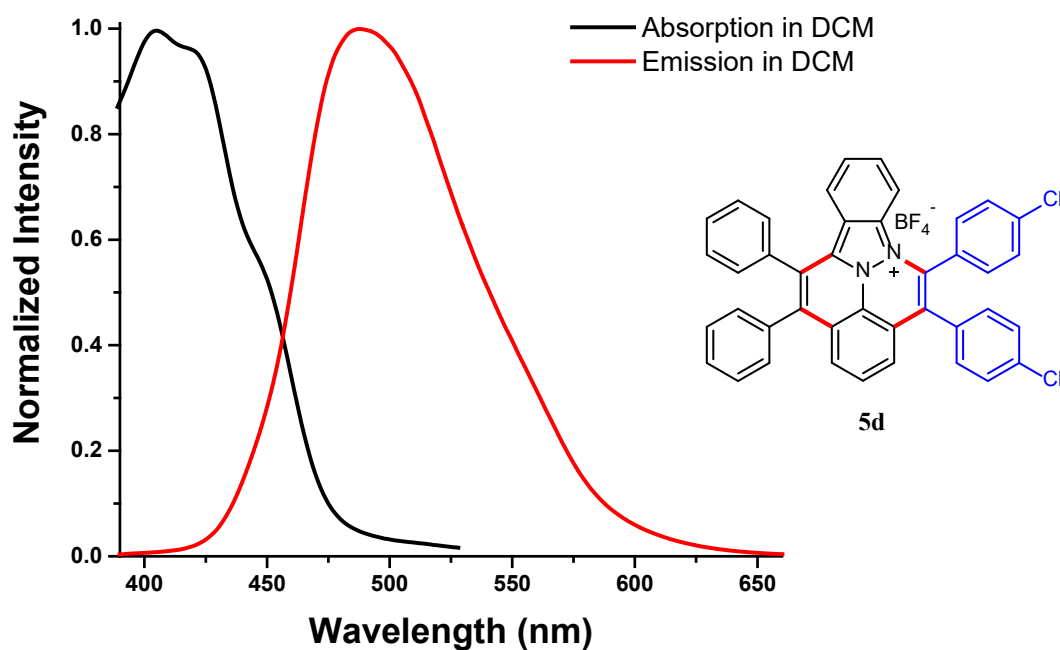

**Figure SI12:** Normalized absorption (black), Fluorescence in DCM (red) spectra of compound **5d**

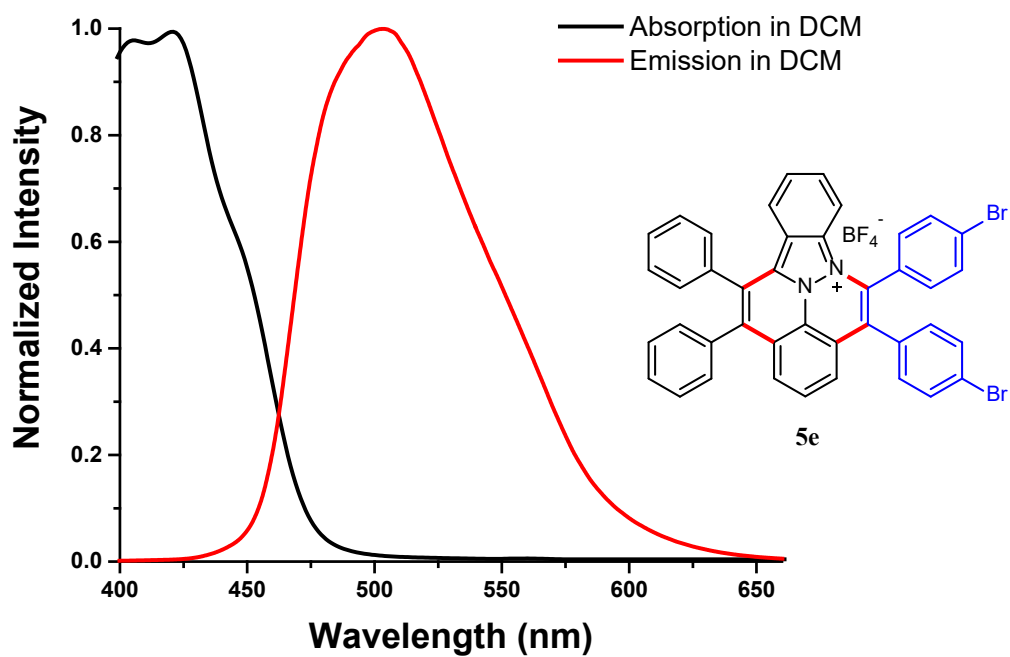

**Figure SI13:** Normalized absorption (black), Fluorescence in DCM (red) spectra of compound **5e**



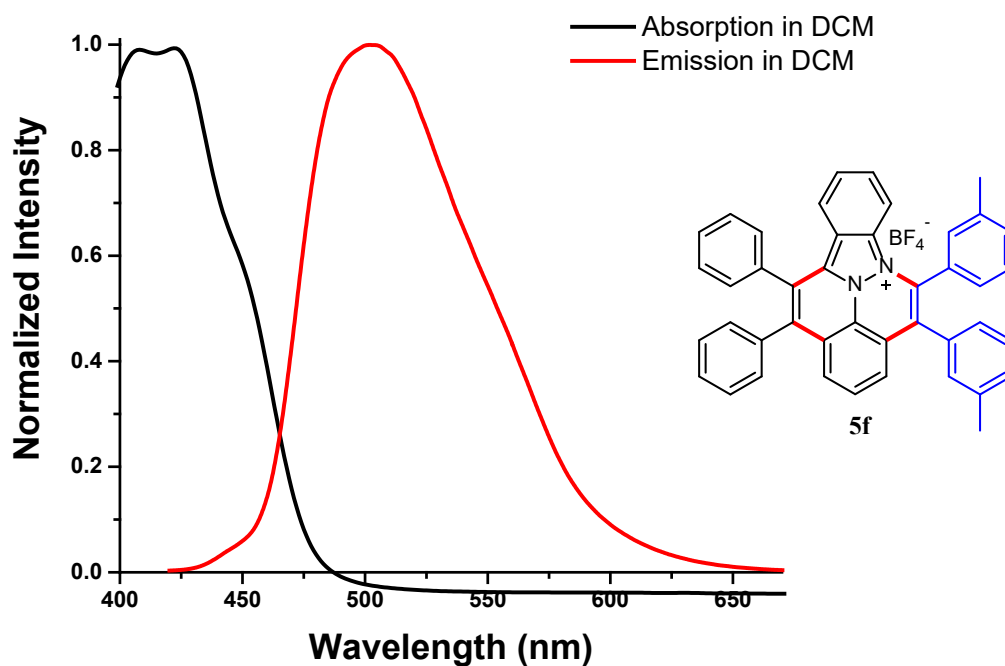

**Figure SI14:** Normalized absorption (black), Fluorescence in DCM (red) spectra of compound **5f**

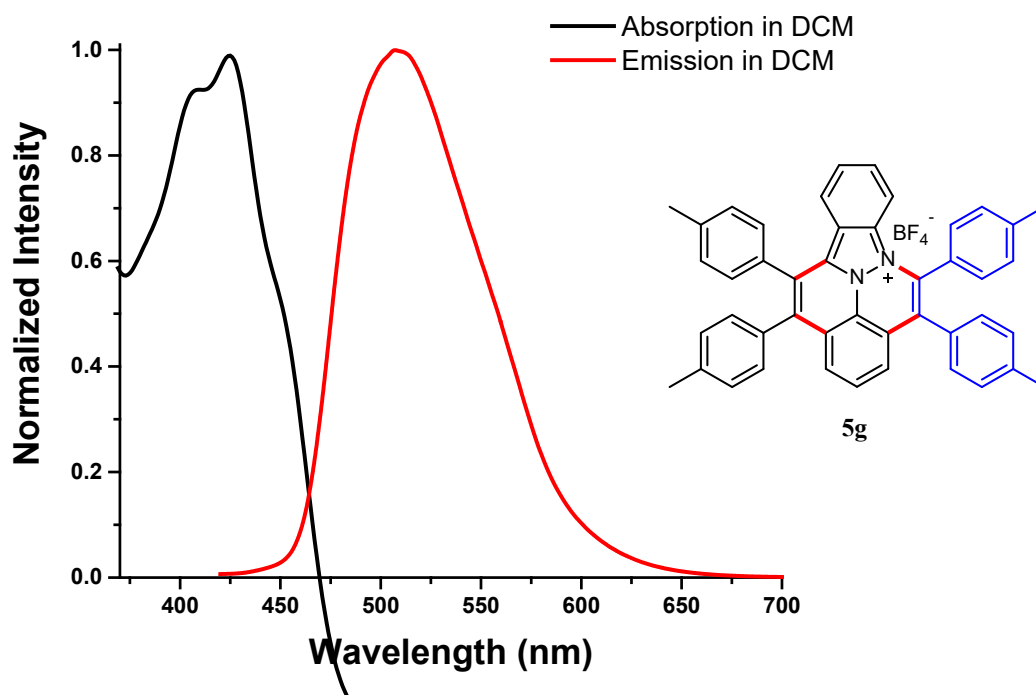

**Figure SI15:** Normalized absorption (black), Fluorescence in DCM (red) spectra of compound **5g**

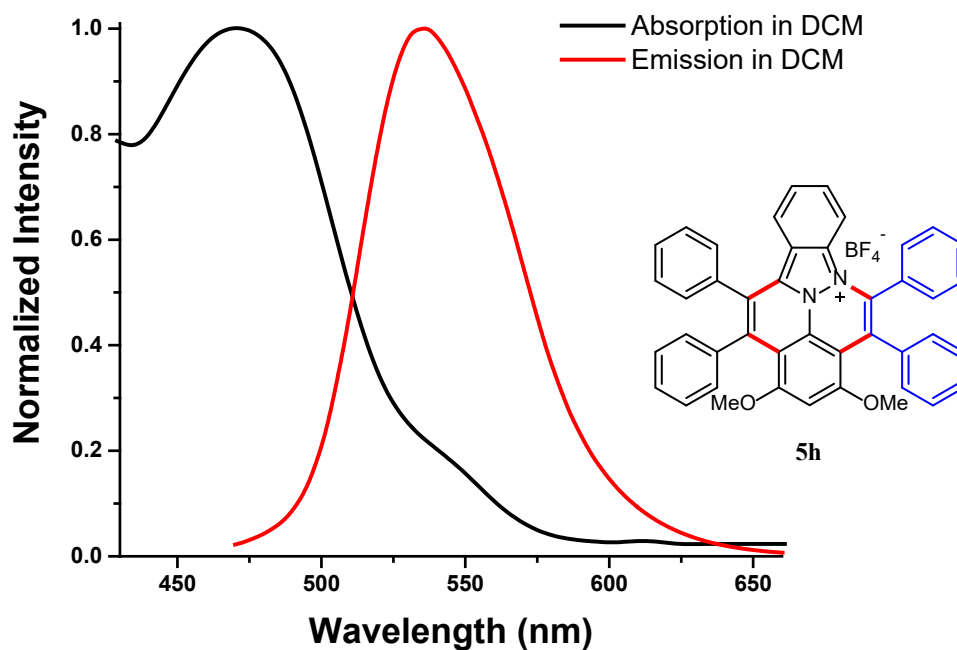

**Figure SI16:** Normalized absorption (black), Fluorescence in DCM (red) spectra of compound **5h**

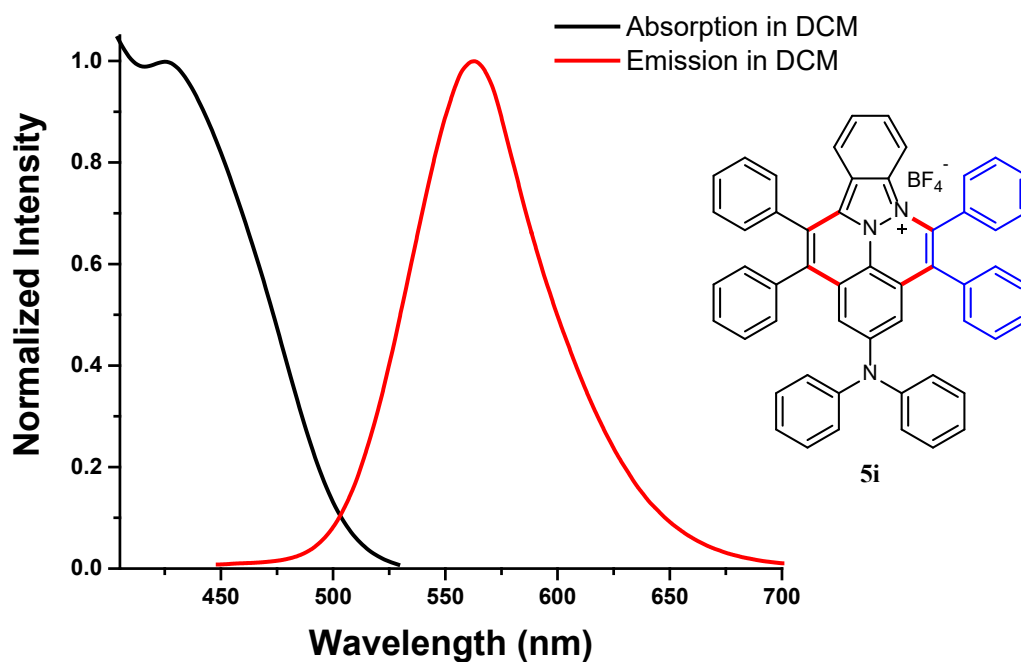

**Figure SI17:** Normalized absorption (black), Fluorescence in DCM (red) spectra of compound **5i**

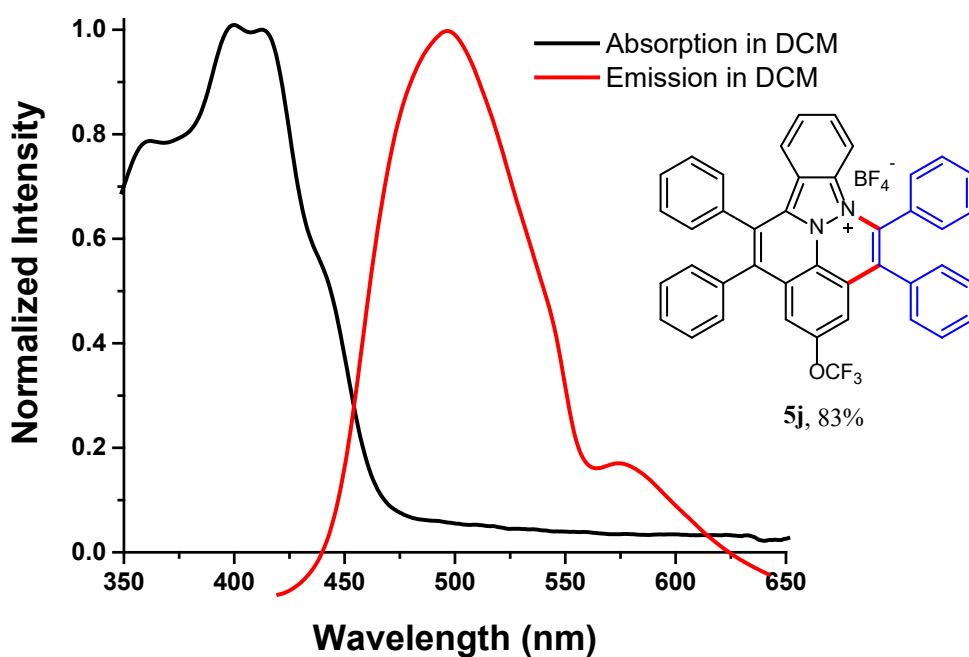

**Figure S118:** Normalized absorption (black), Fluorescence in DCM (red) spectra of compound **5j**

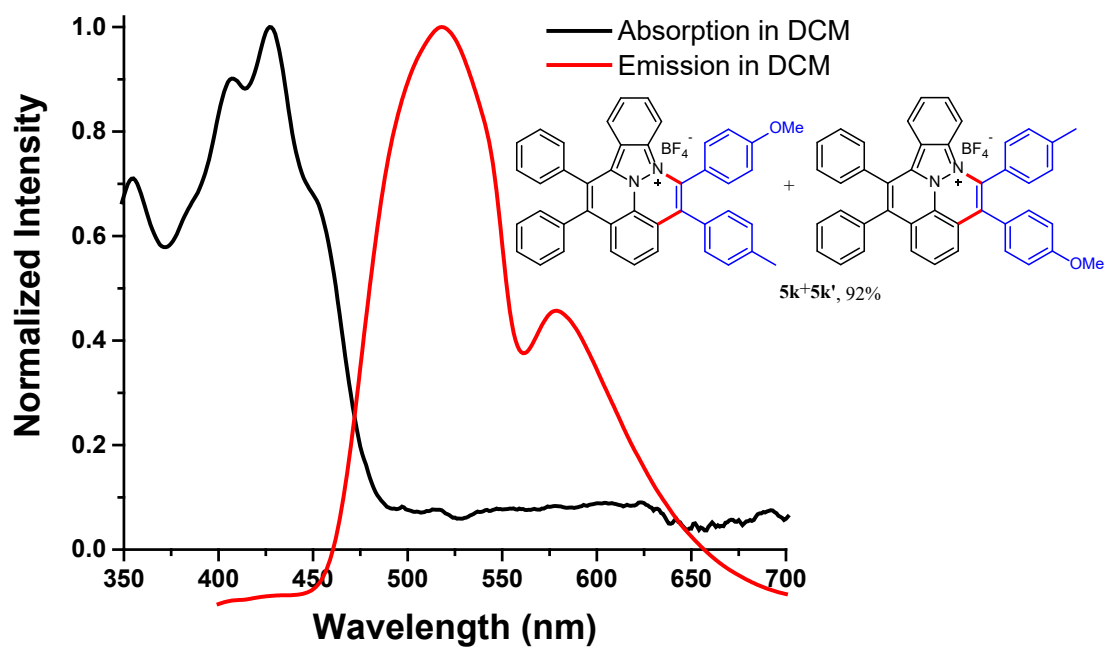

**Figure S119:** Normalized absorption (black), Fluorescence in DCM (red) spectra of compound **5k**

#### 4. Copy of $^1\text{H}$ , $^{13}\text{C}$ and HRMS spectra

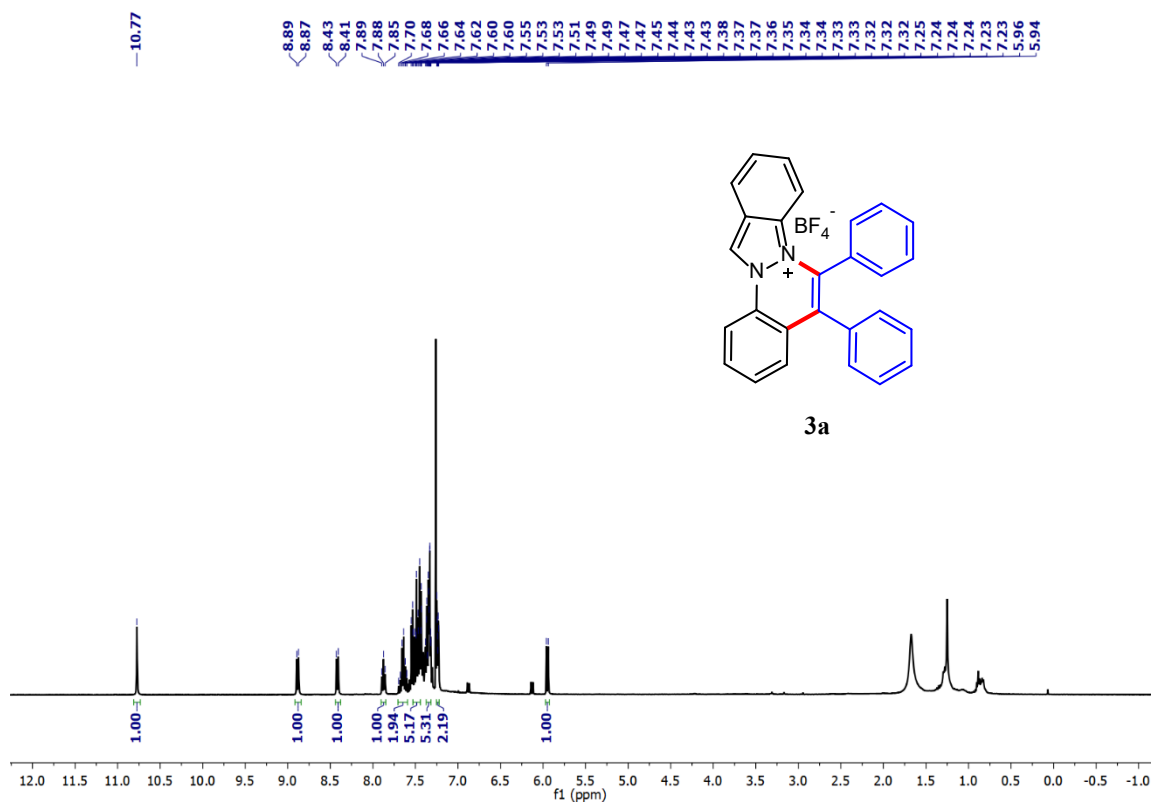

Figure S20:  $^1\text{H}$  NMR spectrum of compound **3a** in  $\text{CDCl}_3$

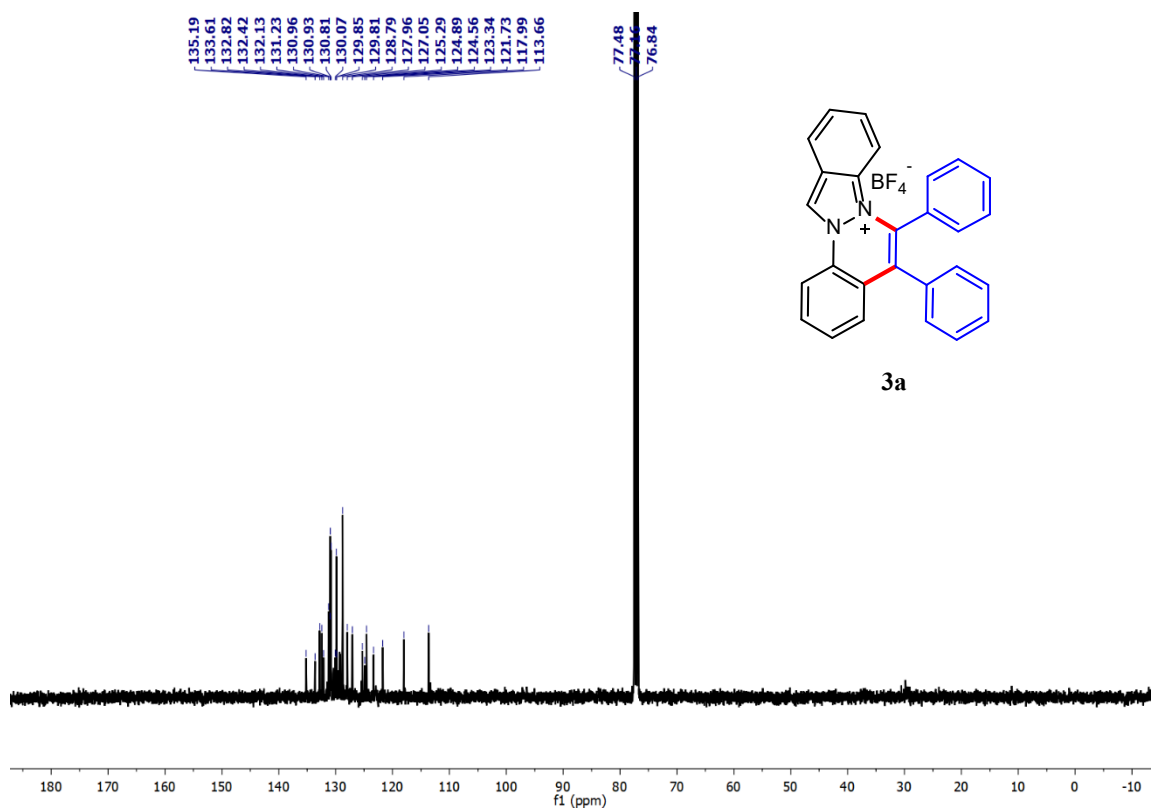

Figure S21:  $^{13}\text{C}$  NMR spectrum of compound **3a** in  $\text{CDCl}_3$

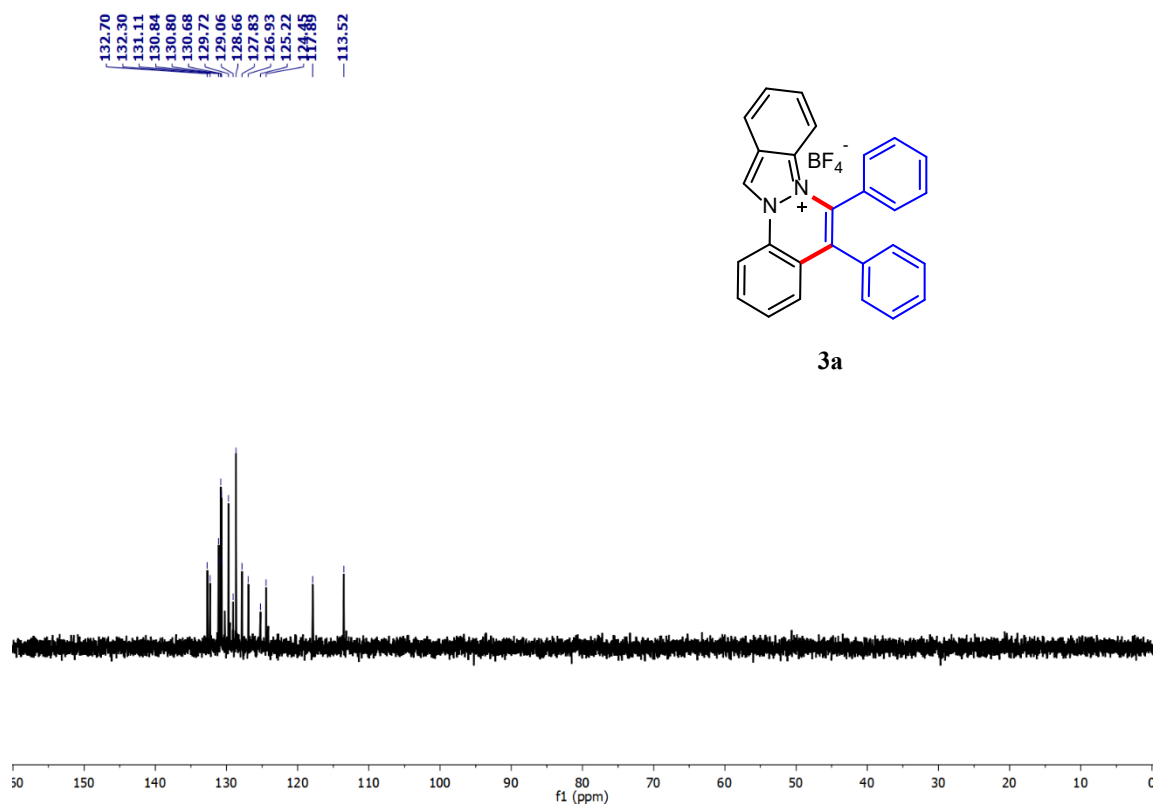

Figure S22:DEPT-135 NMR spectrum of compound **3a** in CDCl<sub>3</sub>

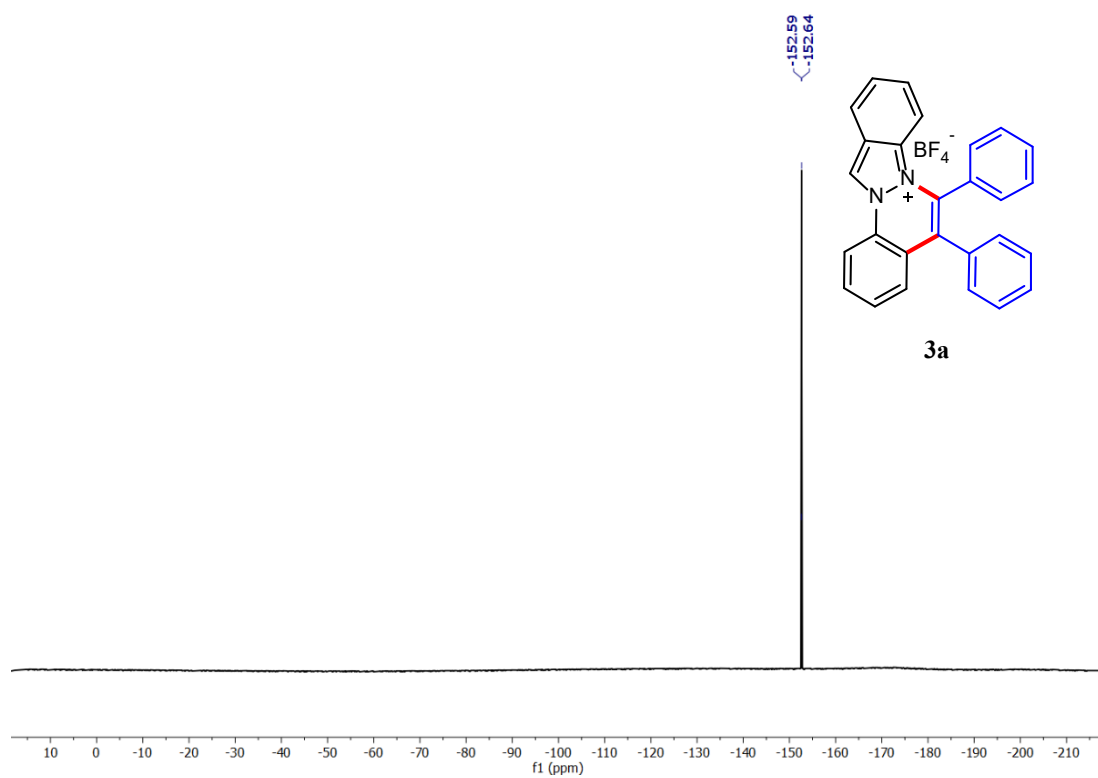

Figure S23: <sup>19</sup>F spectrum of compound **3a**

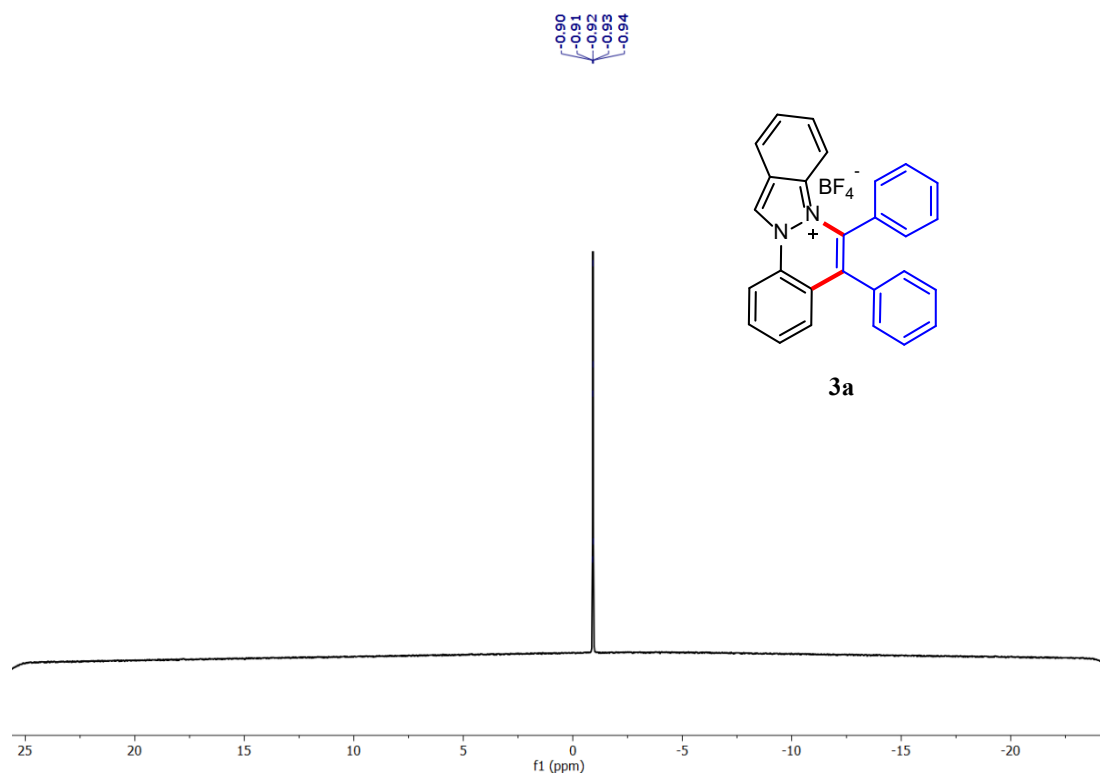

Figure S24:  $^{11}\text{B}$  spectrum of compound **3a**

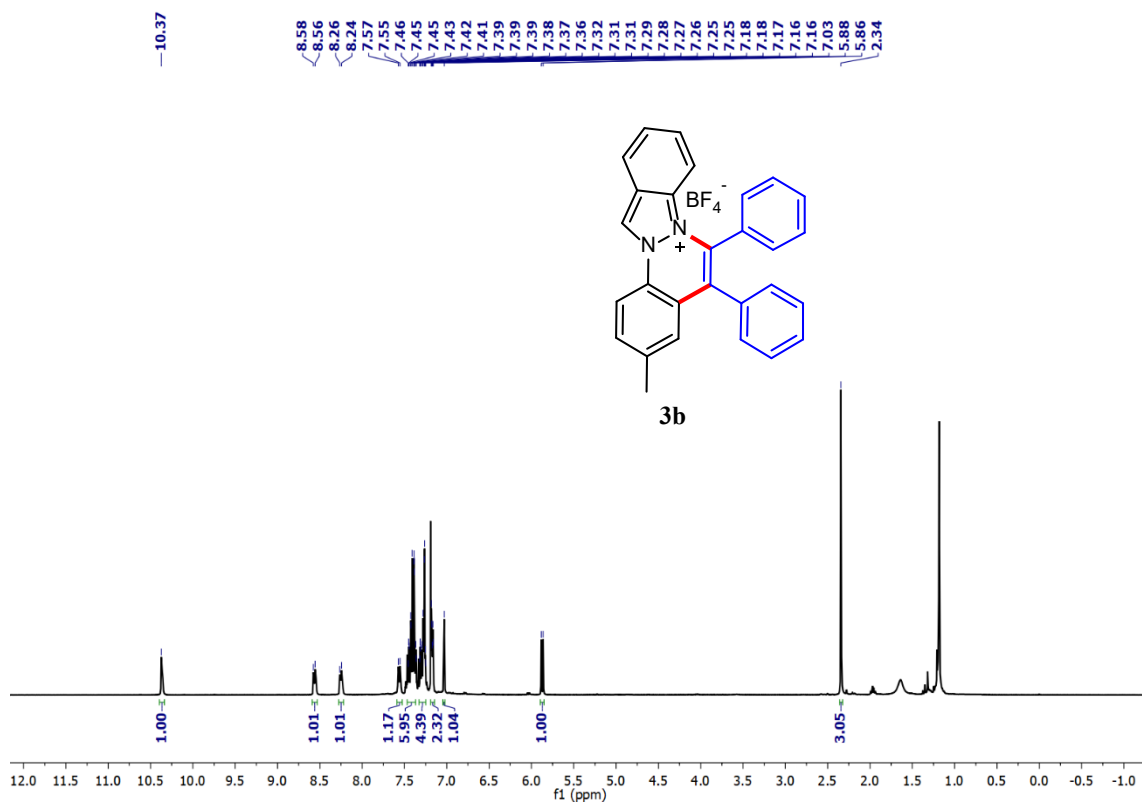

Figure S25:  $^1\text{H}$  NMR spectrum of compound **3b** in  $\text{CDCl}_3$

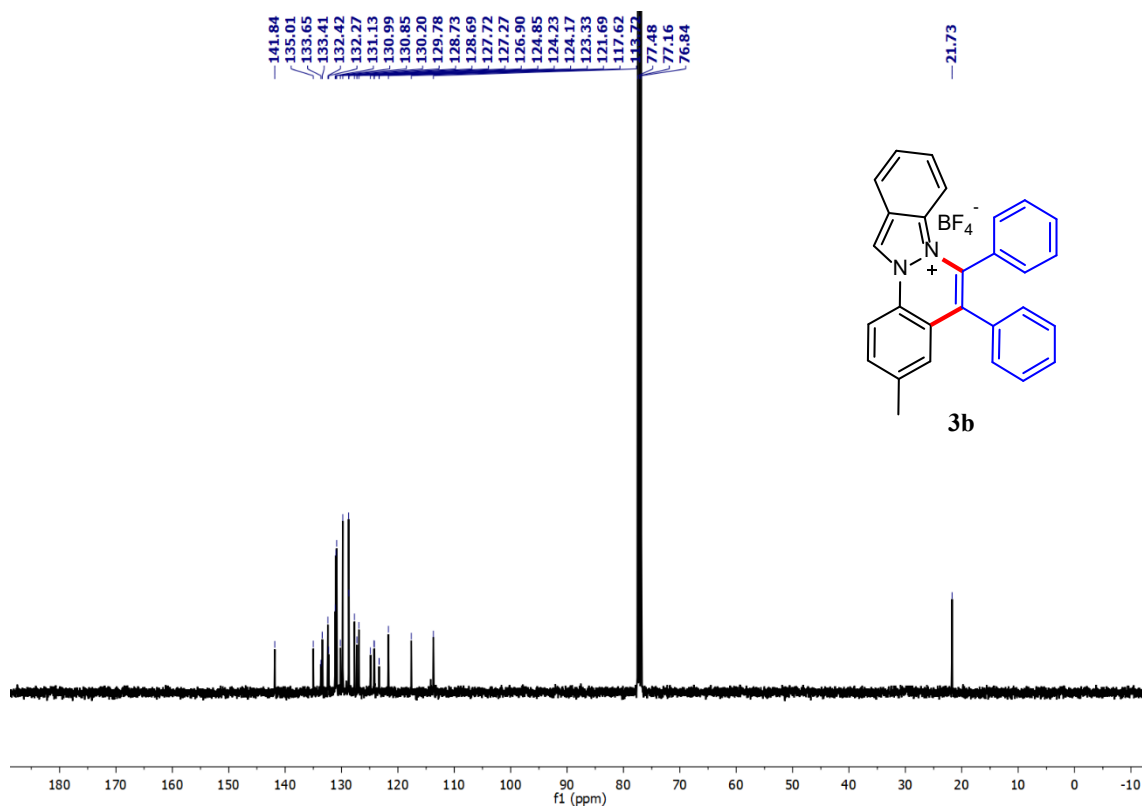

Figure S26:  $^{13}\text{C}$  NMR spectrum of compound **3b** in  $\text{CDCl}_3$

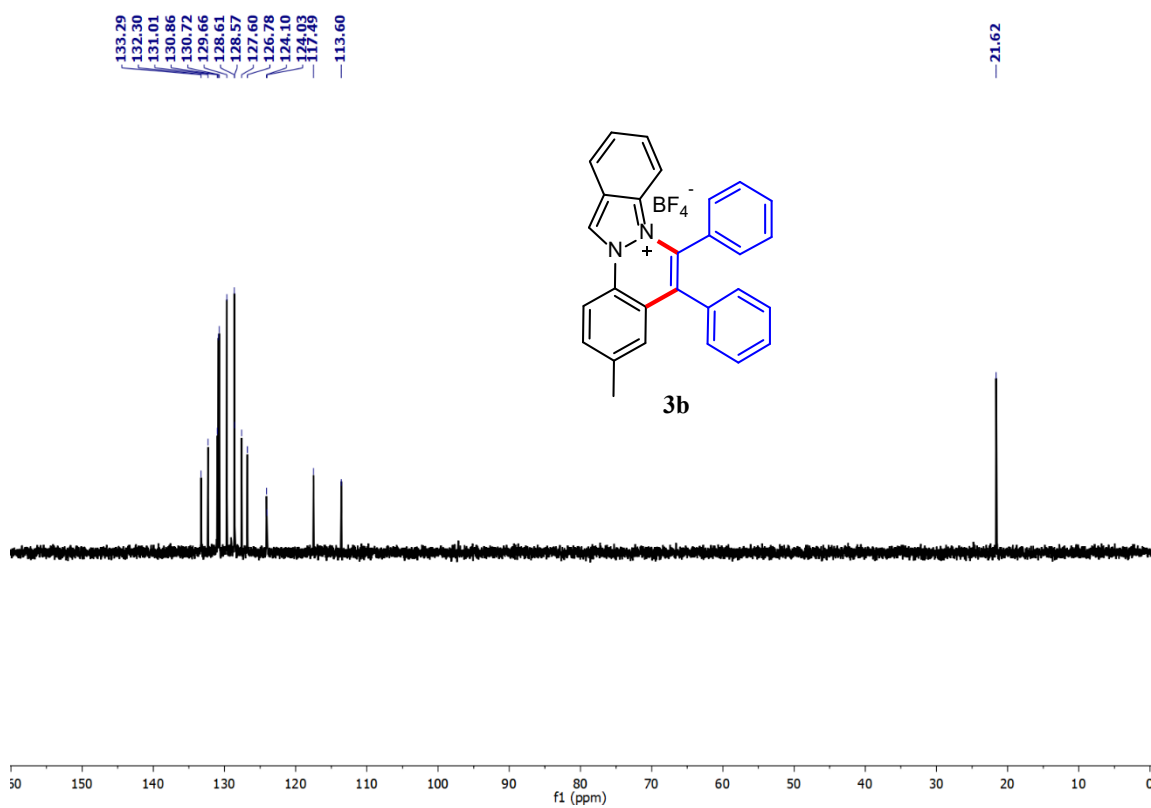

Figure S27: DEPT-135 NMR spectrum of compound **3b** in  $\text{CDCl}_3$

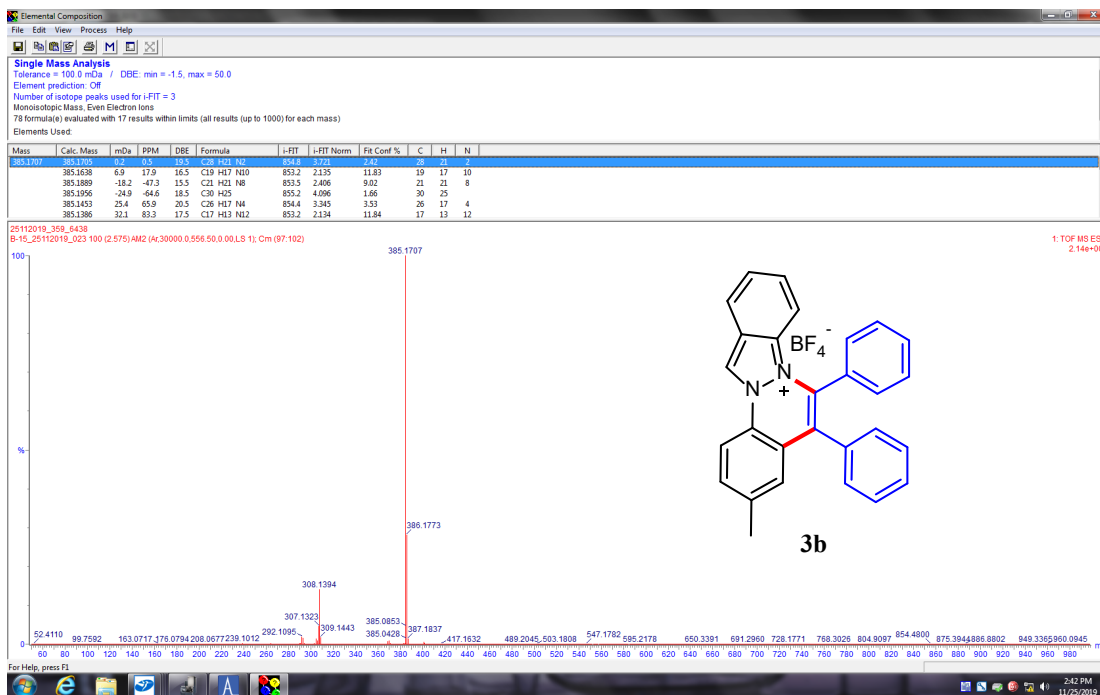

Figure S28: HRMS spectrum of compound **3b**

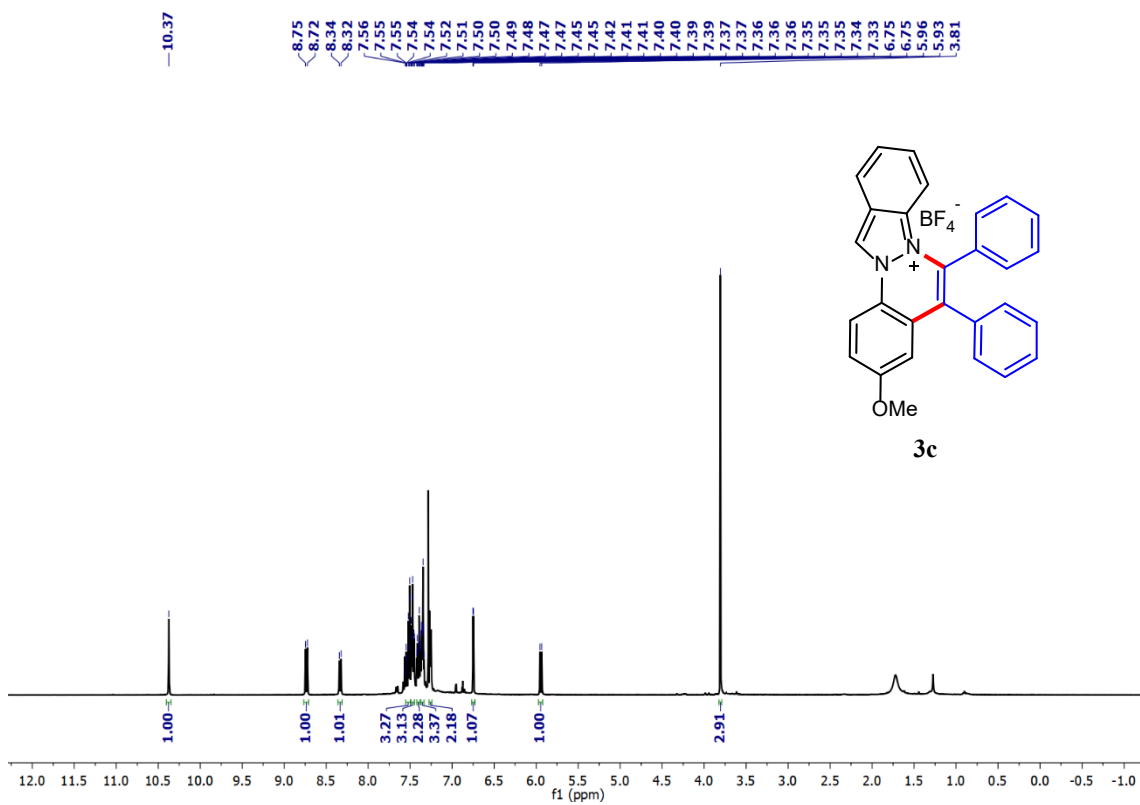

Figure S29: <sup>1</sup>H NMR spectrum of compound **3c** in CDCl<sub>3</sub>



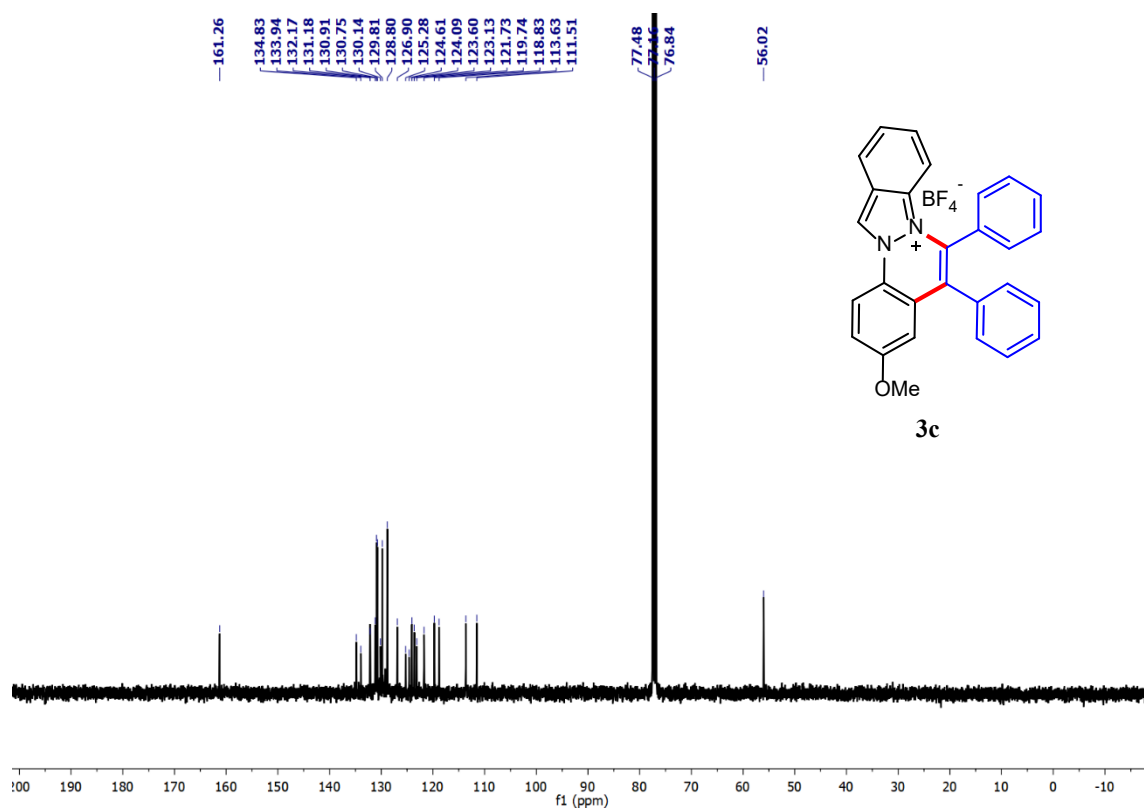

**Figure S30:**  $^{13}\text{C}$  NMR spectrum of compound **3c** in  $\text{CDCl}_3$

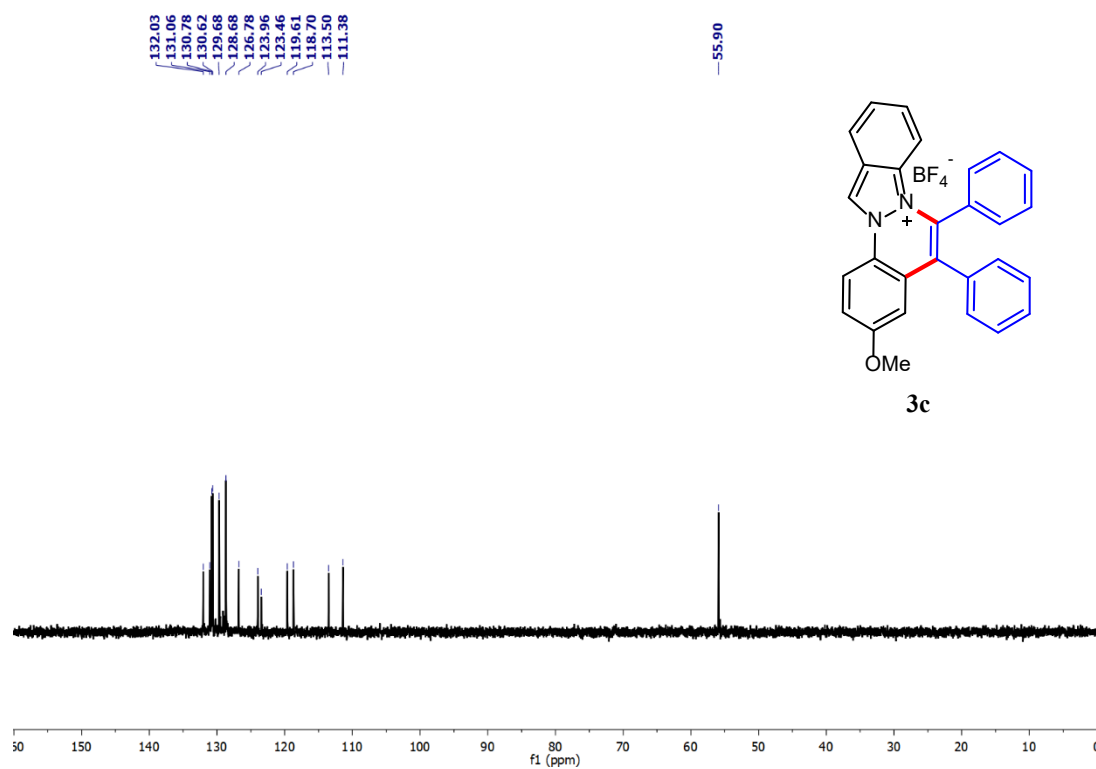

**Figure S31:** DEPT-135 NMR spectrum of compound **3c** in  $\text{CDCl}_3$

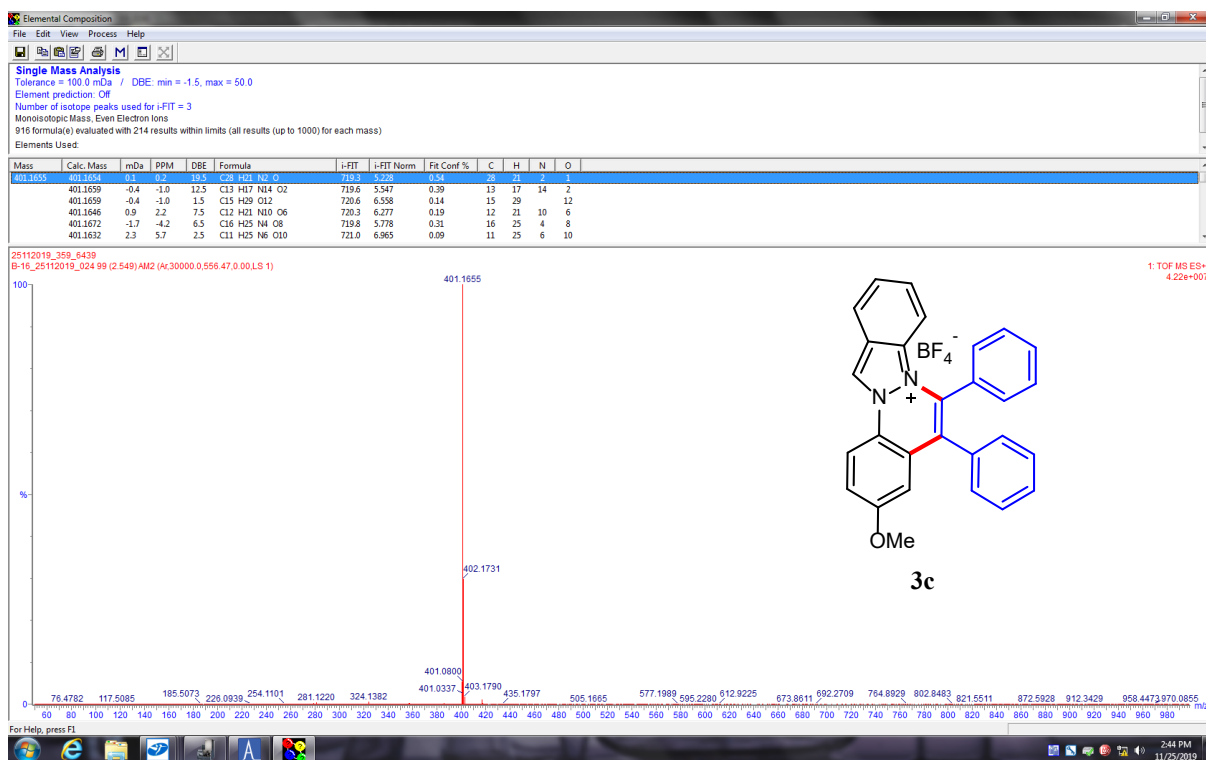

Figure S32: HRMS spectrum of compound **3c**

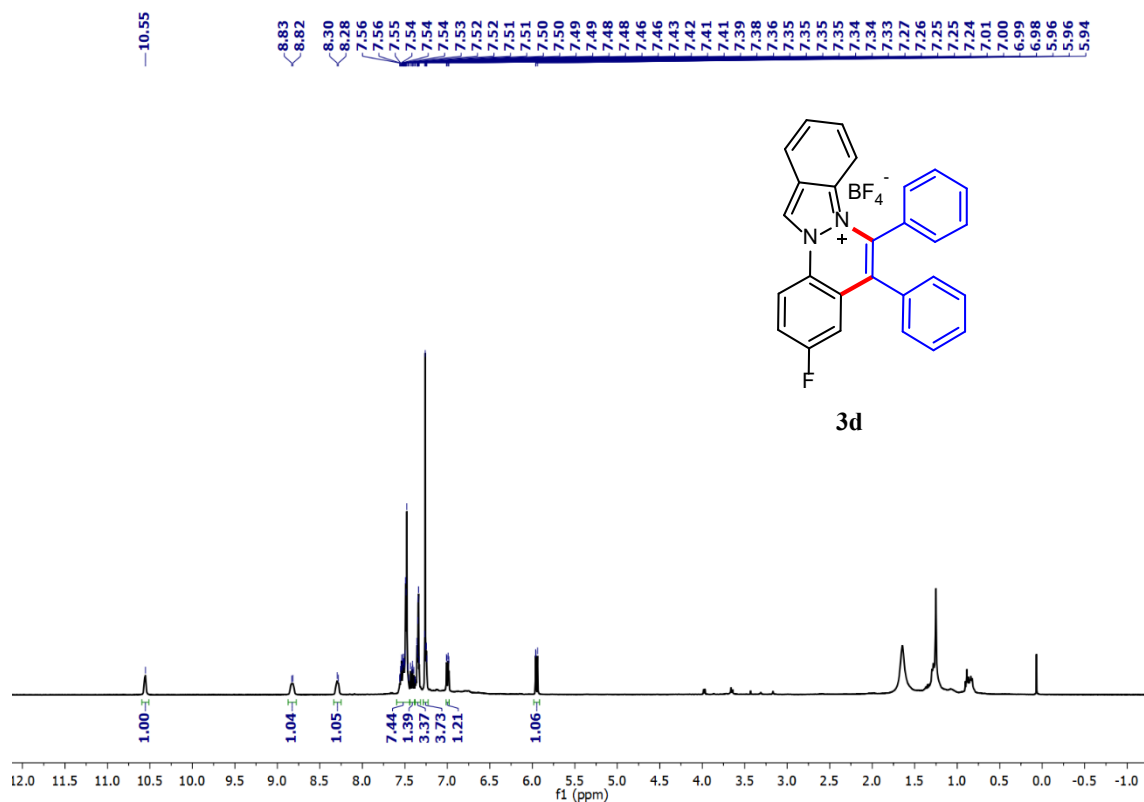

Figure S33:  $^1\text{H}$  NMR spectrum of compound **3d** in  $\text{CDCl}_3$

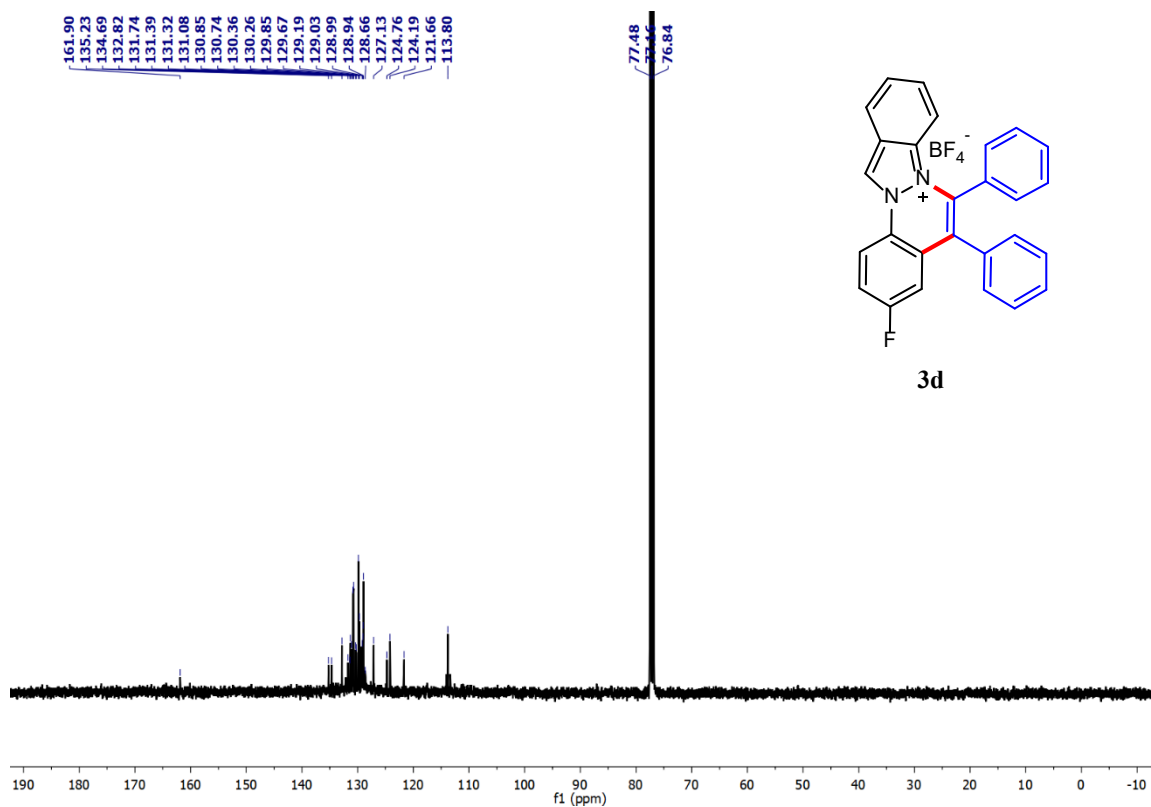

Figure S34:  $^{13}\text{C}$  NMR spectrum of compound **3d** in  $\text{CDCl}_3$

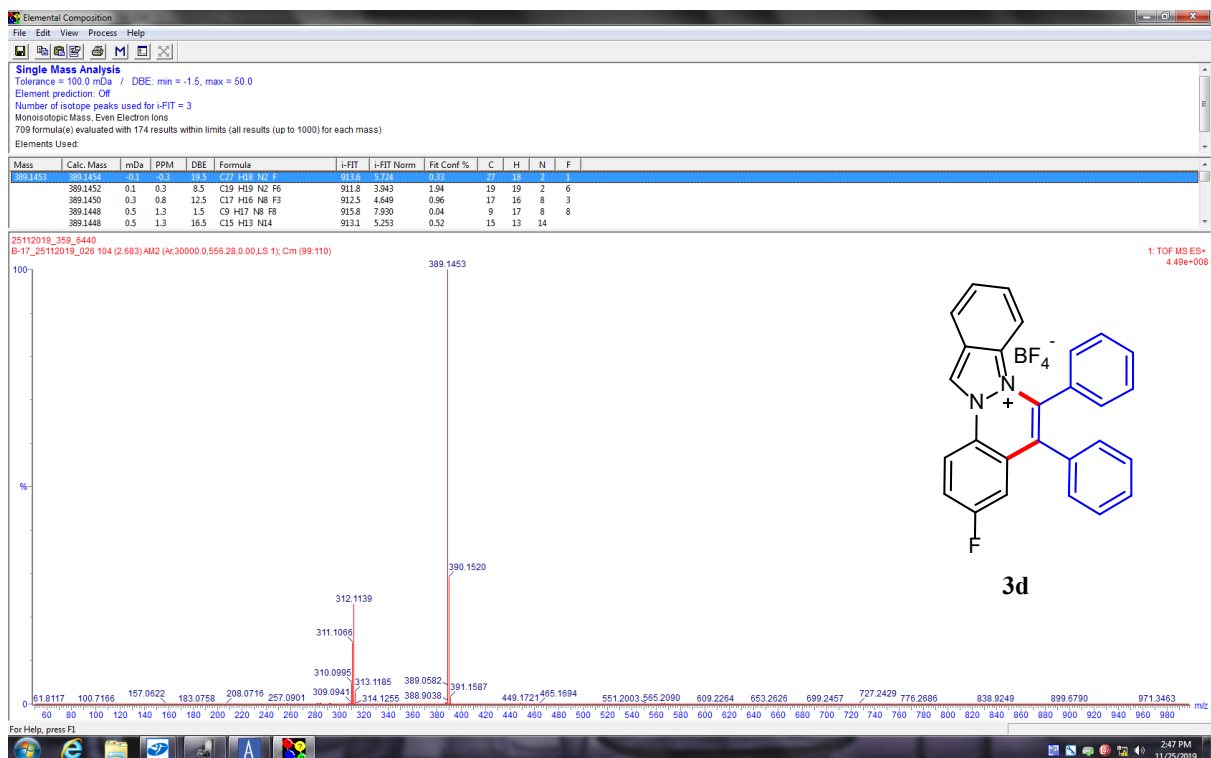

Figure S35: HRMS spectrum of compound **3d**

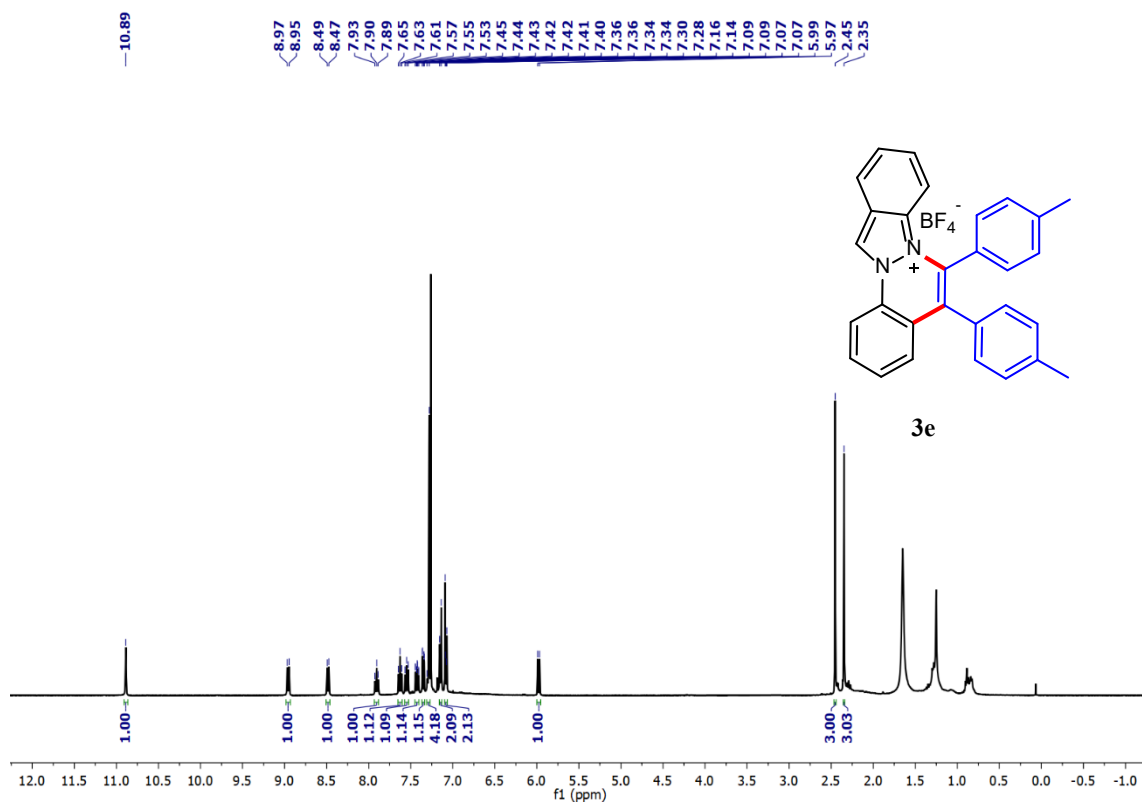

Figure S36:  $^1\text{H}$  NMR spectrum of compound **3e** in  $\text{CDCl}_3$

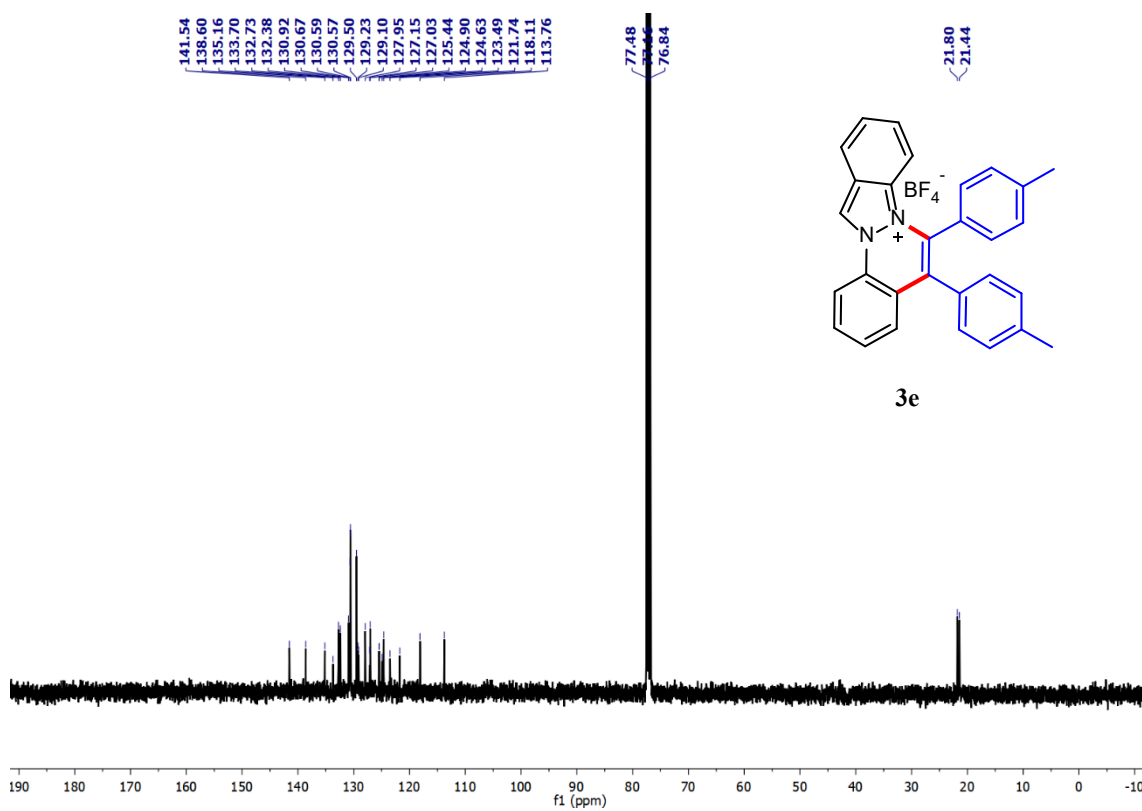

Figure S37:  $^{13}\text{C}$  NMR spectrum of compound **3e** in  $\text{CDCl}_3$

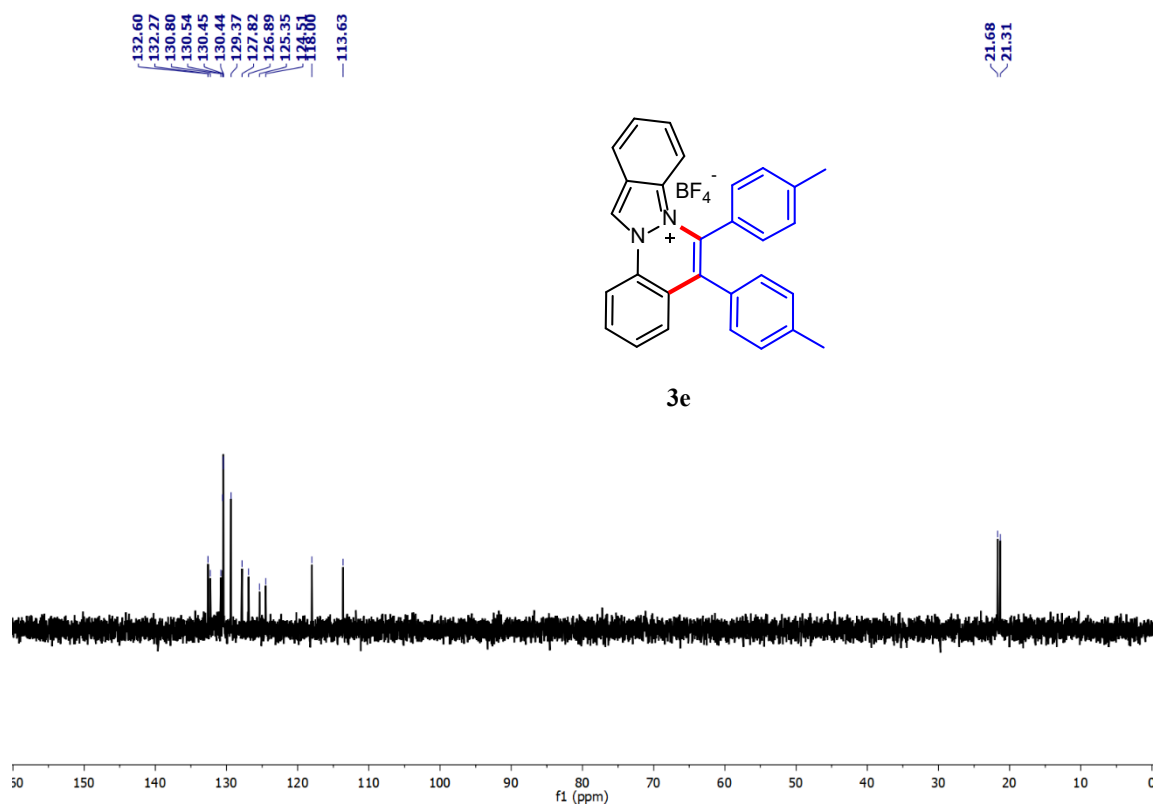

Figure S38: DEPT-135 NMR spectrum of compound **3e** in  $\text{CDCl}_3$

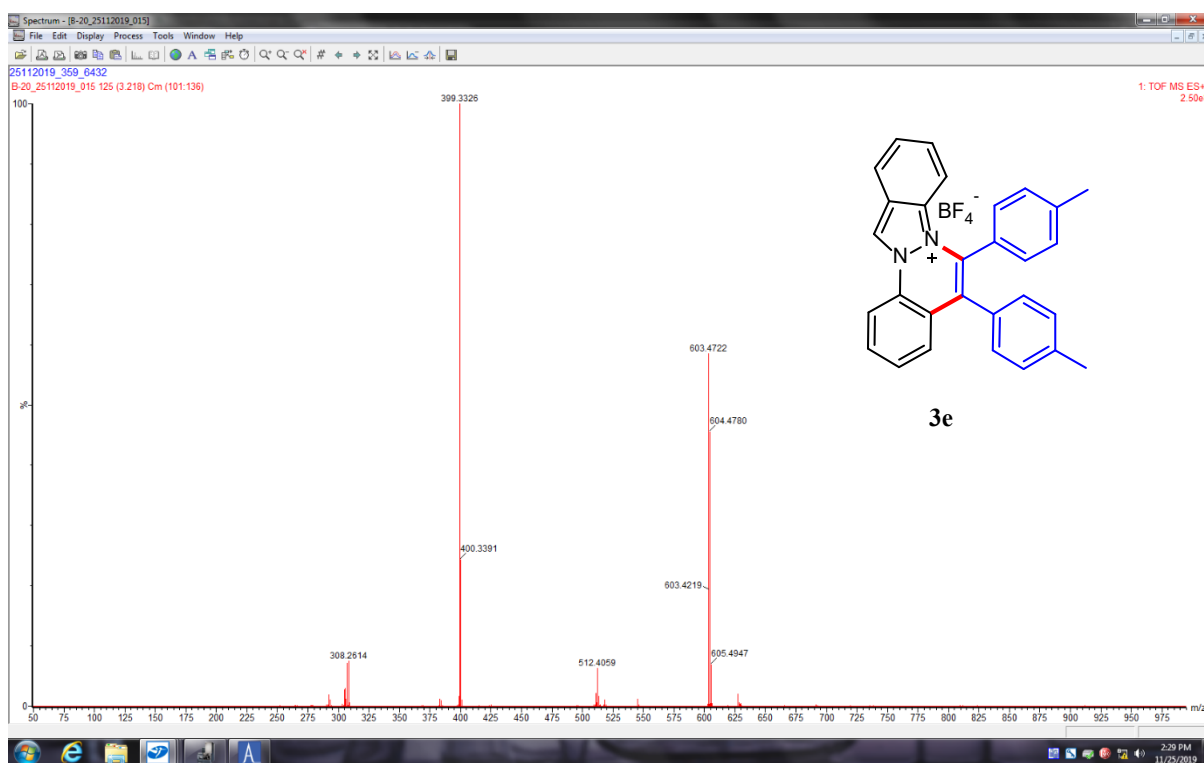

Figure S39: HRMS spectrum of compound **3e**

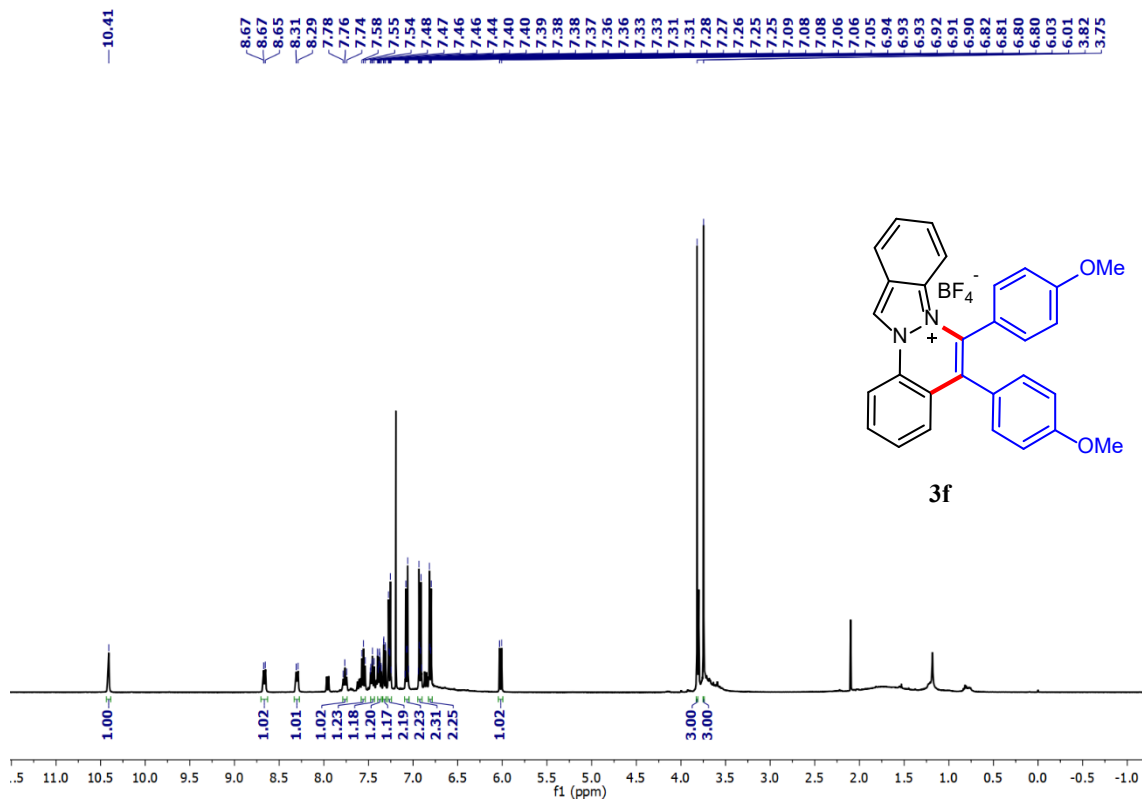

Figure S40:  $^1\text{H}$  NMR spectrum of compound **3f** in  $\text{CDCl}_3$

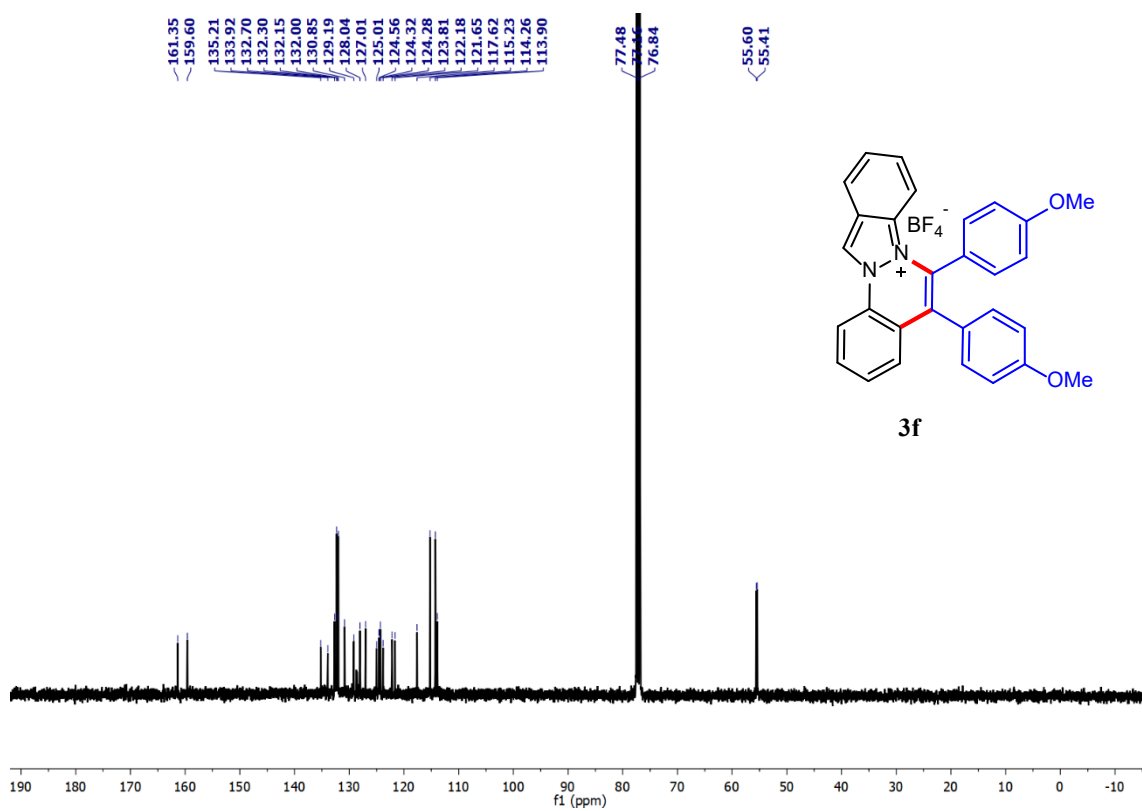

Figure S41:  $^{13}\text{C}$  NMR spectrum of compound **3f** in  $\text{CDCl}_3$

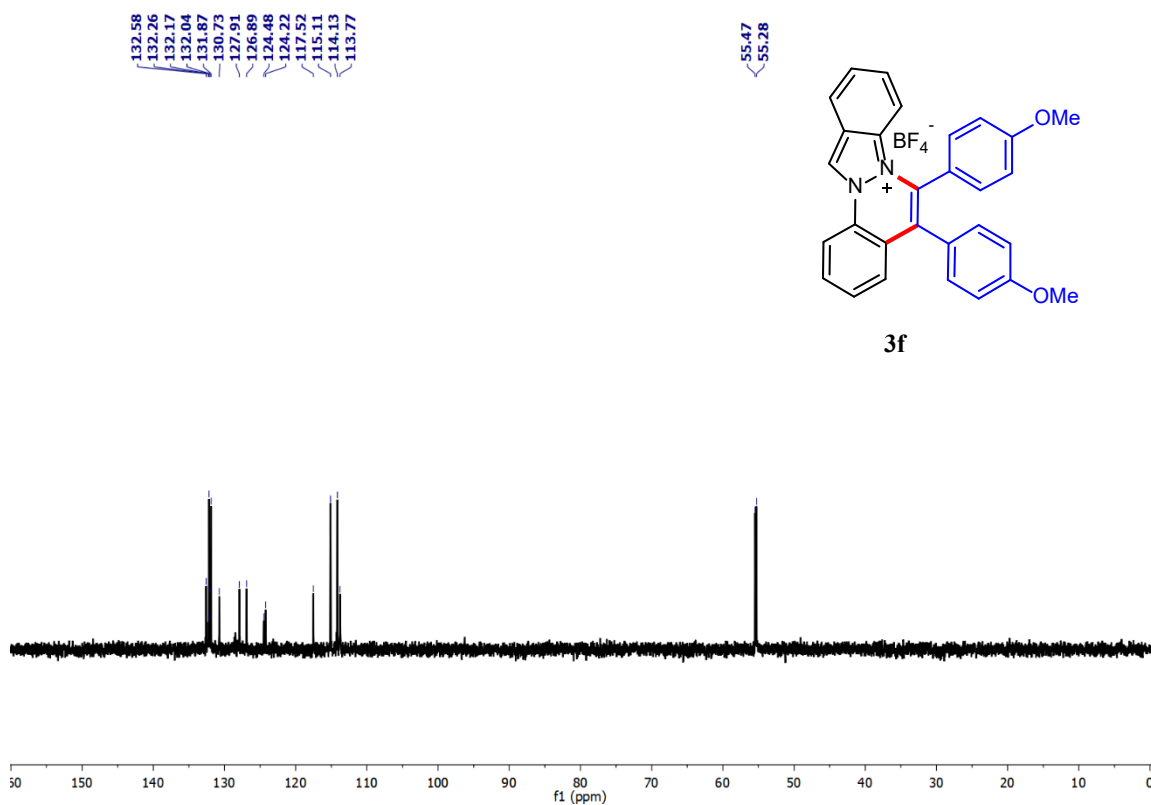

Figure S42: DEPT-135 NMR spectrum of compound **3f** in  $\text{CDCl}_3$

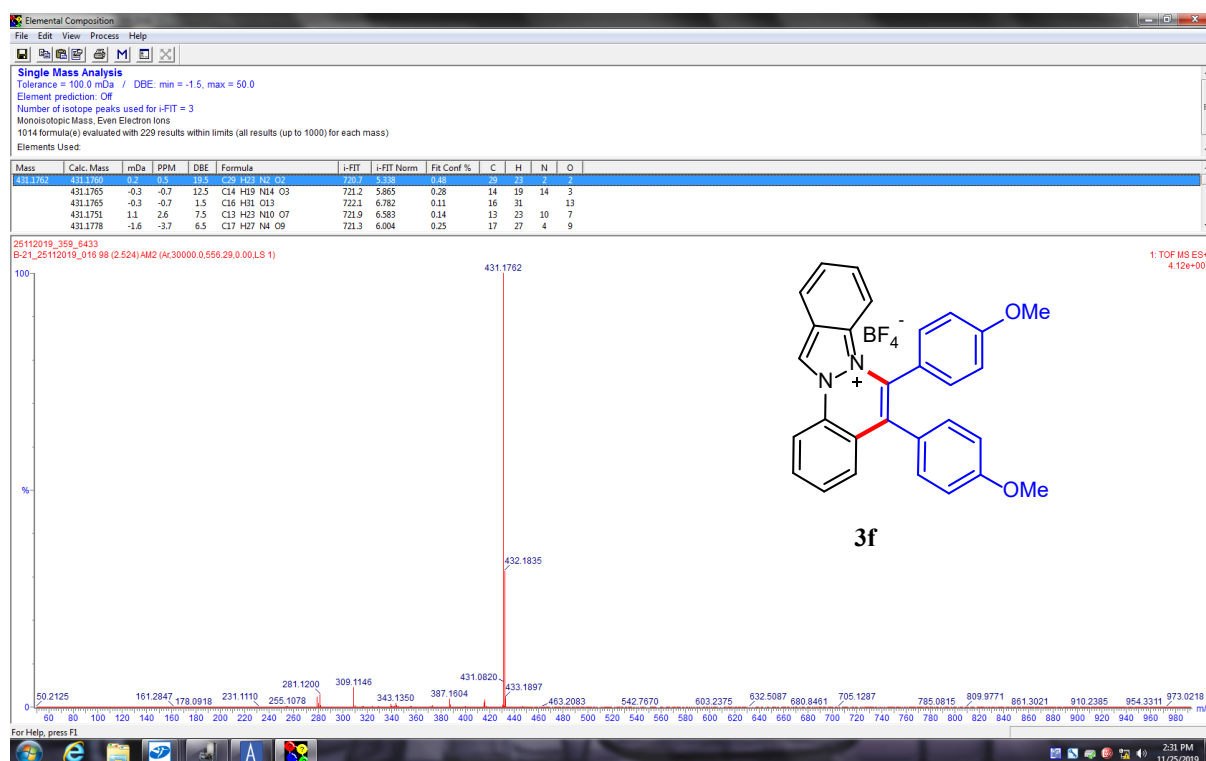

Figure S43: HRMS spectrum of compound **3f**

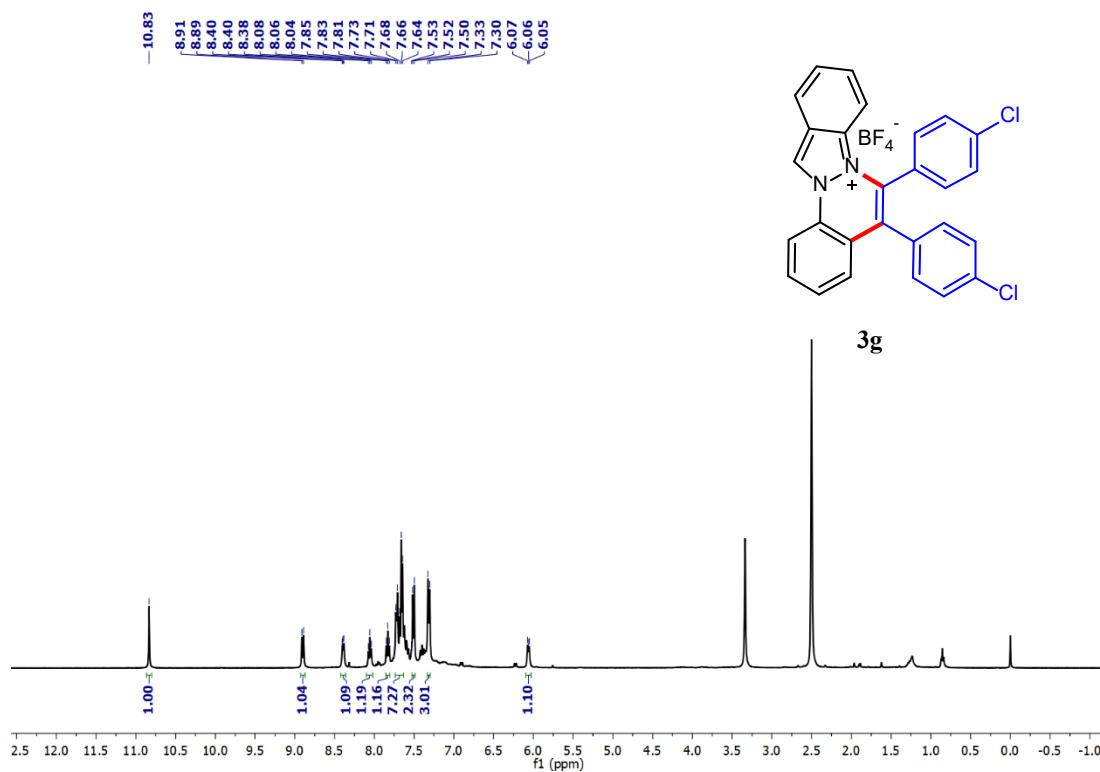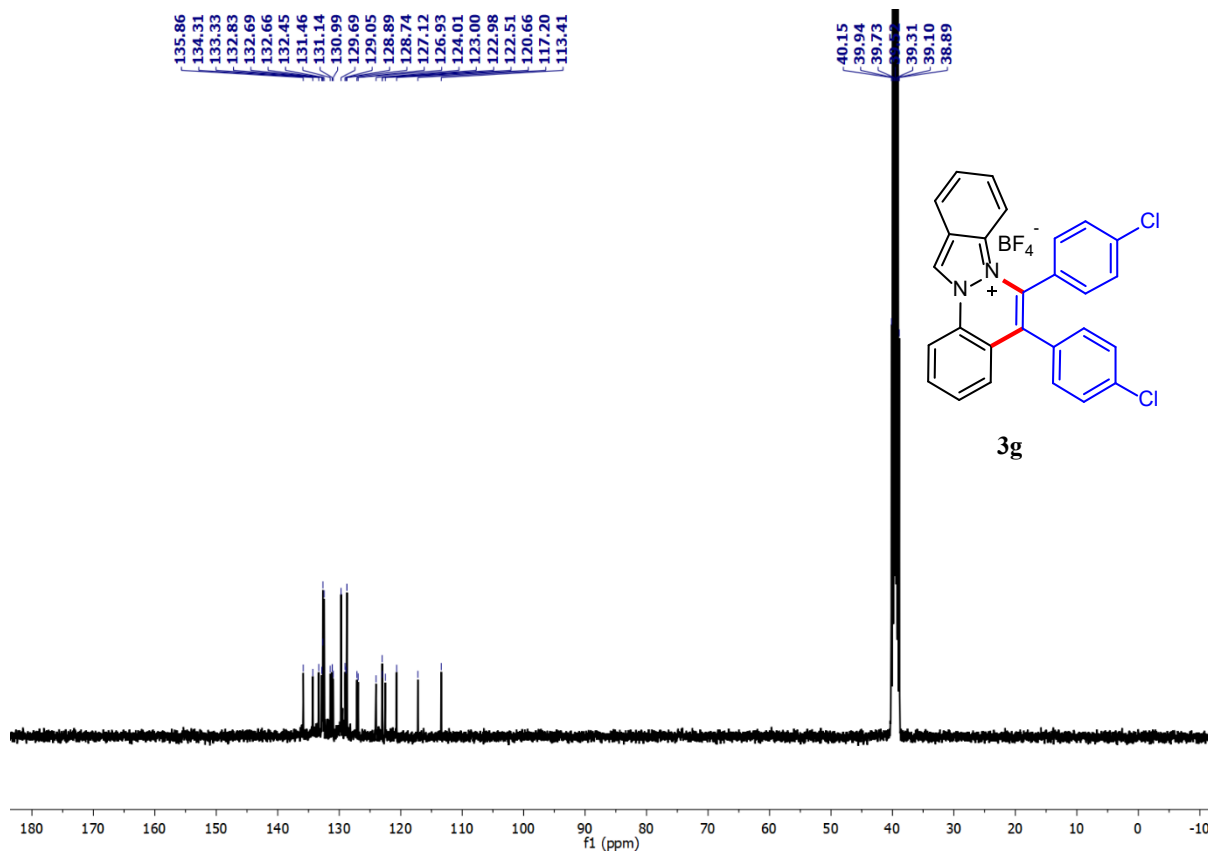



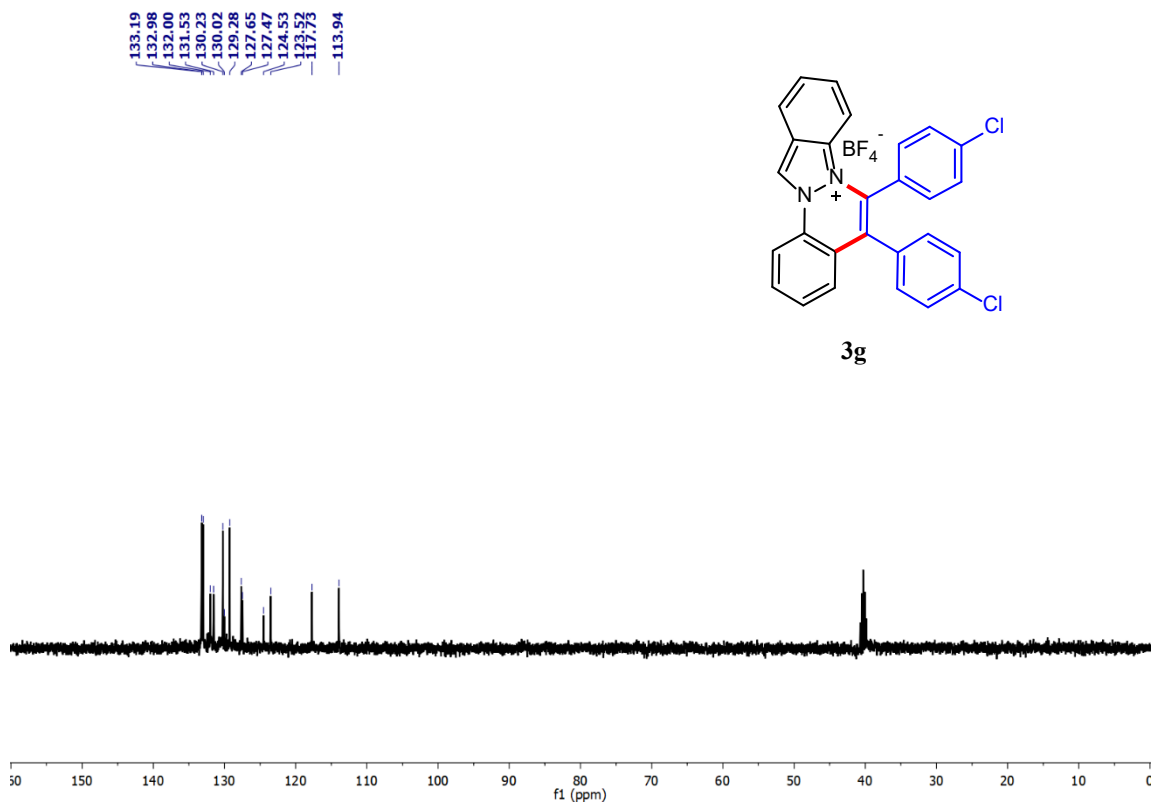

Figure S46: DEPT-135 NMR spectrum of compound **3g** in DMSO- $d_6$

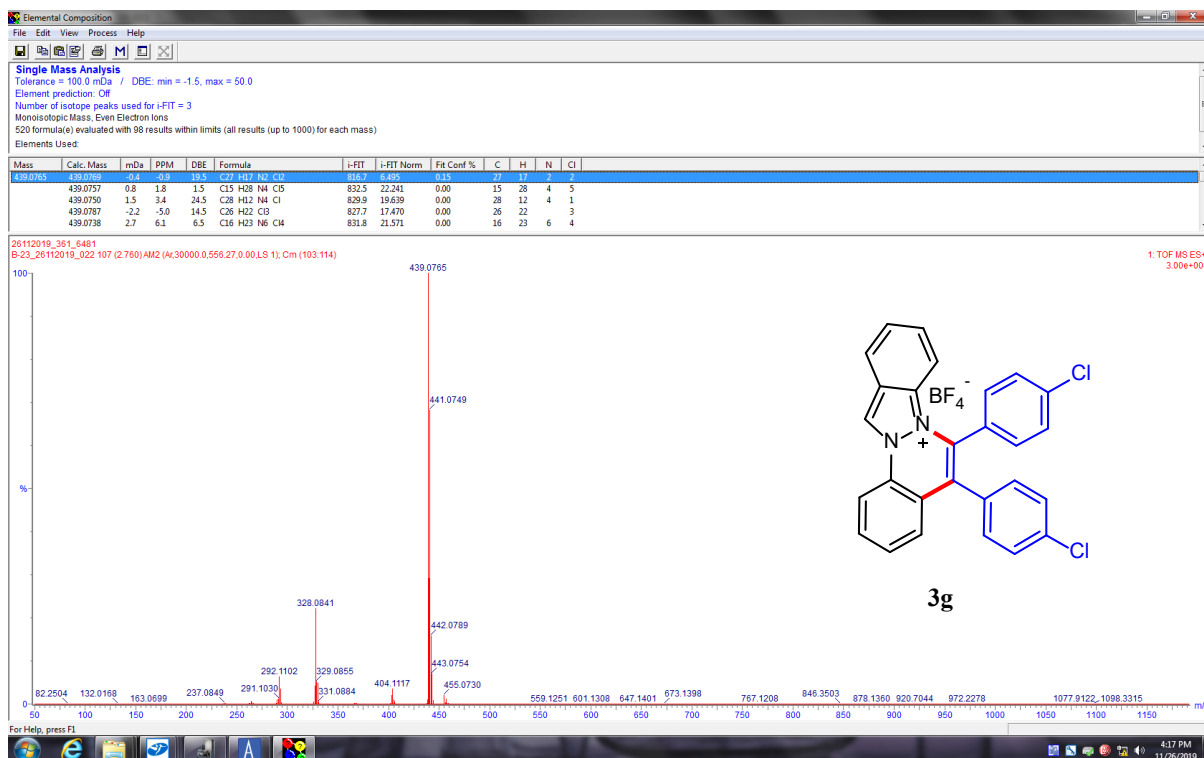

Figure S47: HRMS spectrum of compound **3g**

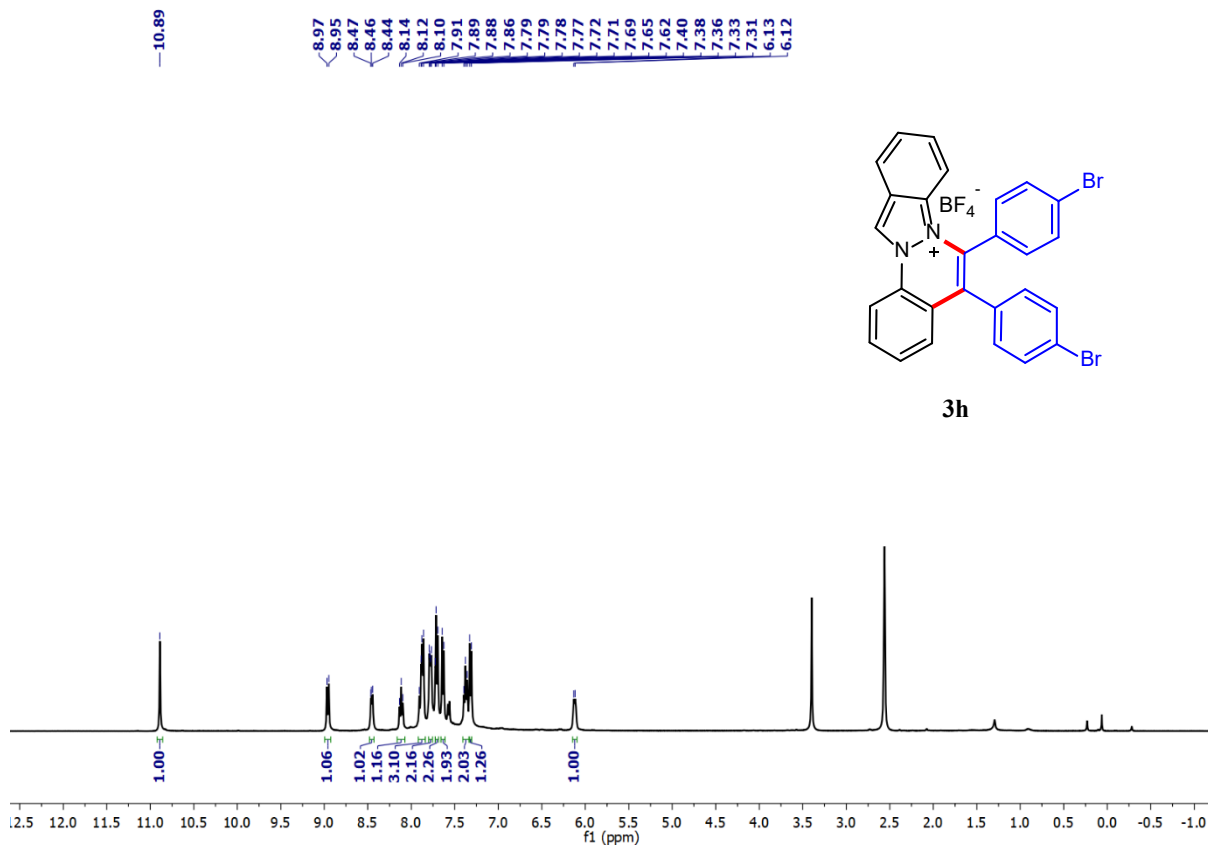

Figure S48: <sup>1</sup>H NMR spectrum of compound **3h** in DMSO-d<sub>6</sub>

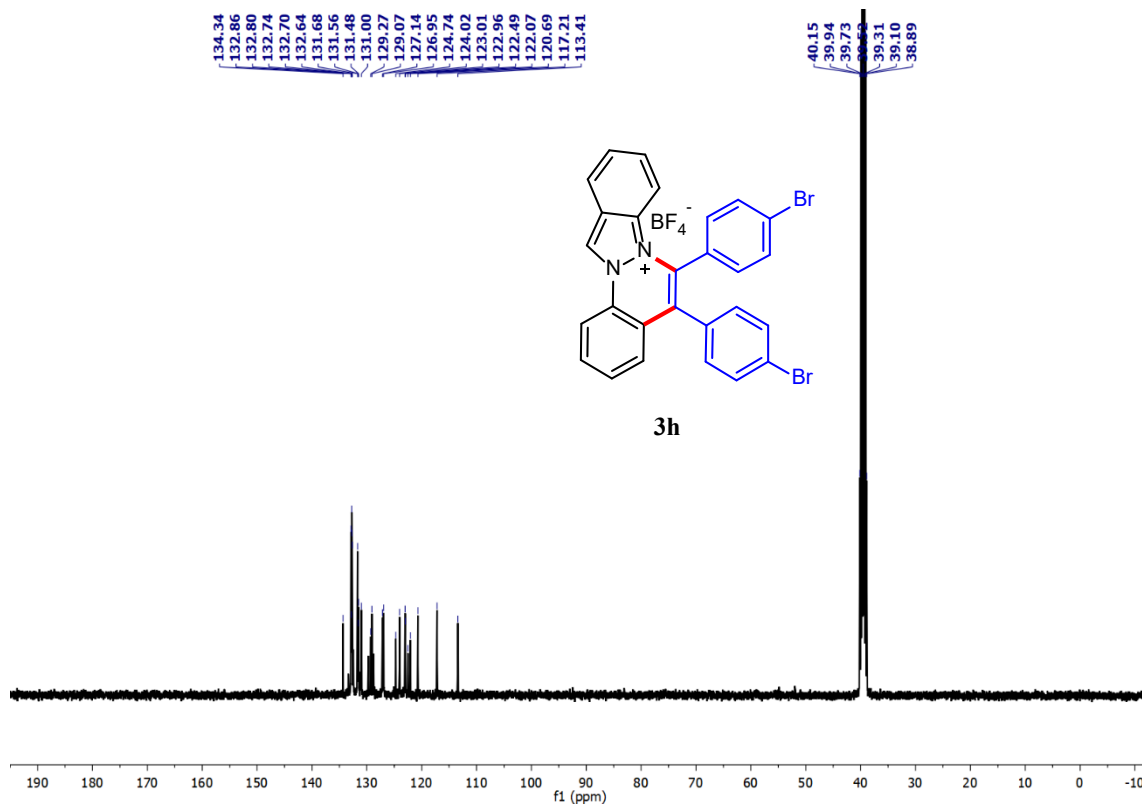

Figure S49: <sup>13</sup>C NMR spectrum of compound **3h** in DMSO-d<sub>6</sub>

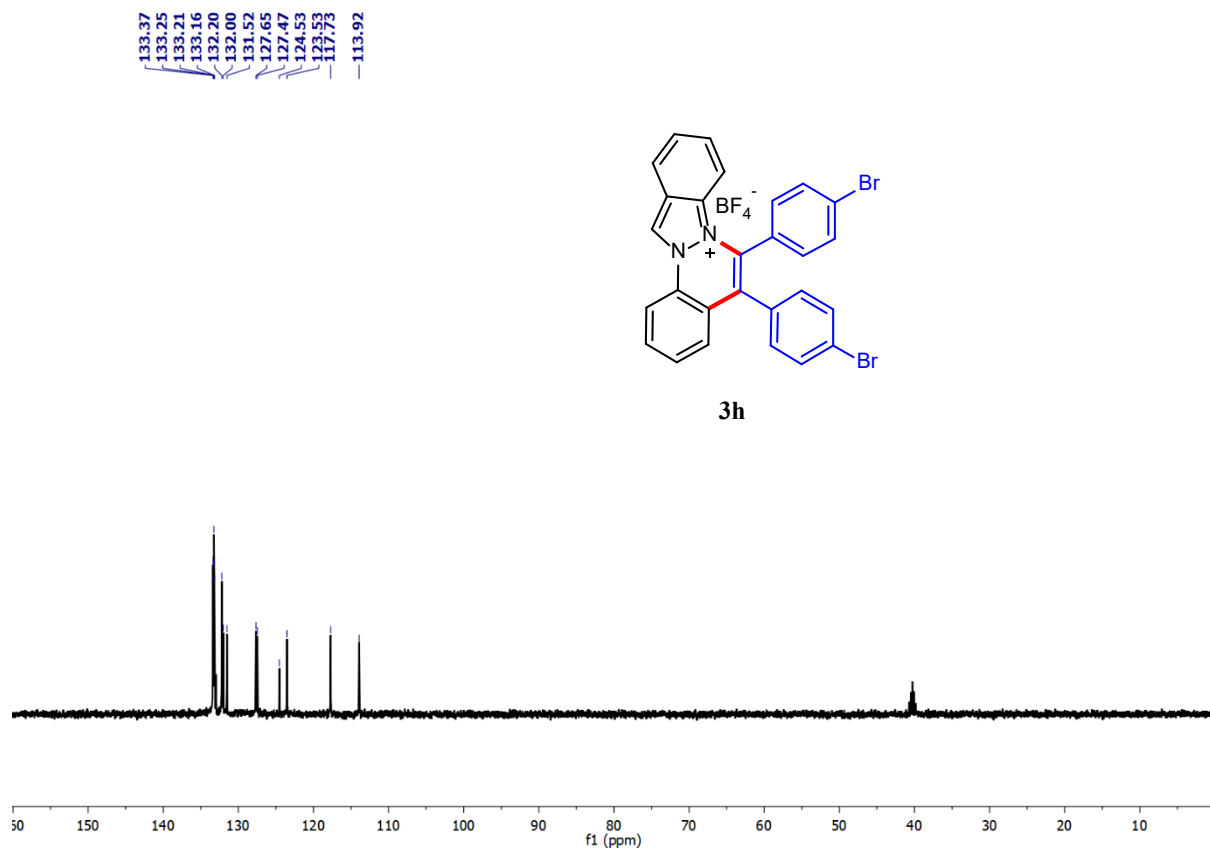

Figure S50: DEPT-135 NMR spectrum of compound **3h** in DMSO-*d*<sub>6</sub>

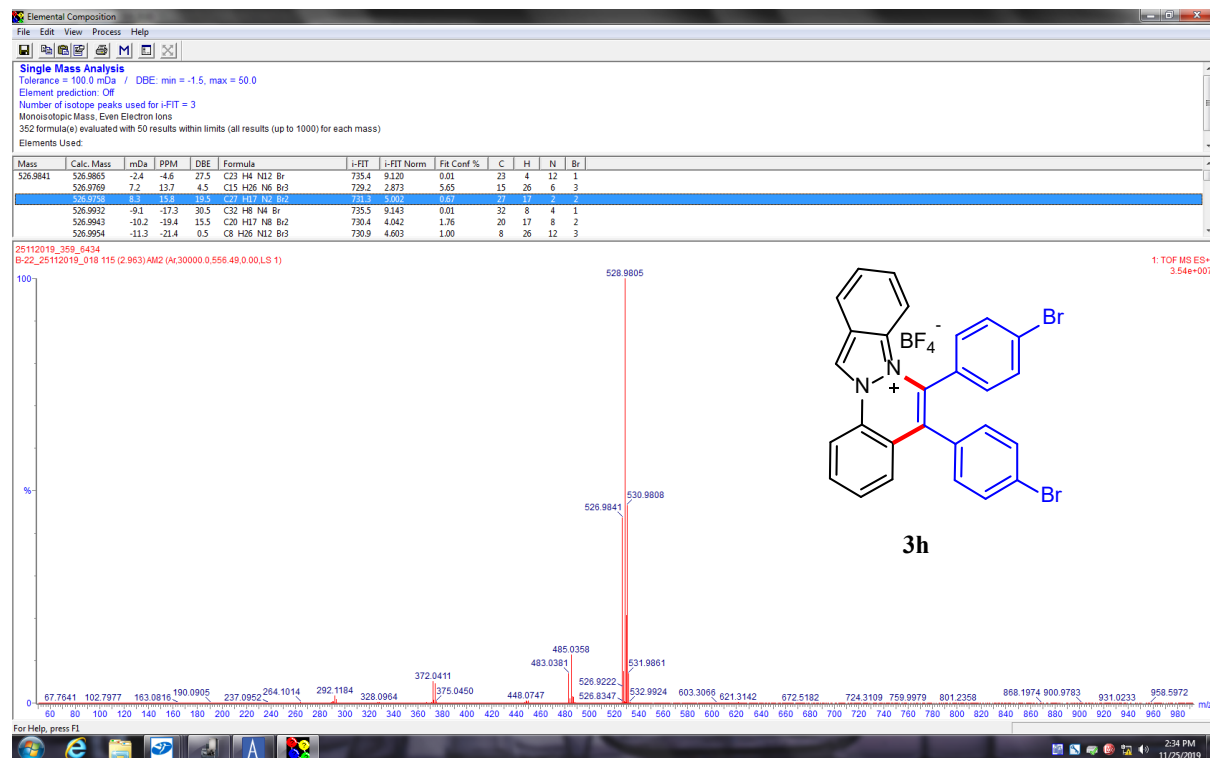

Figure S51: HRMS spectrum of compound **3h**

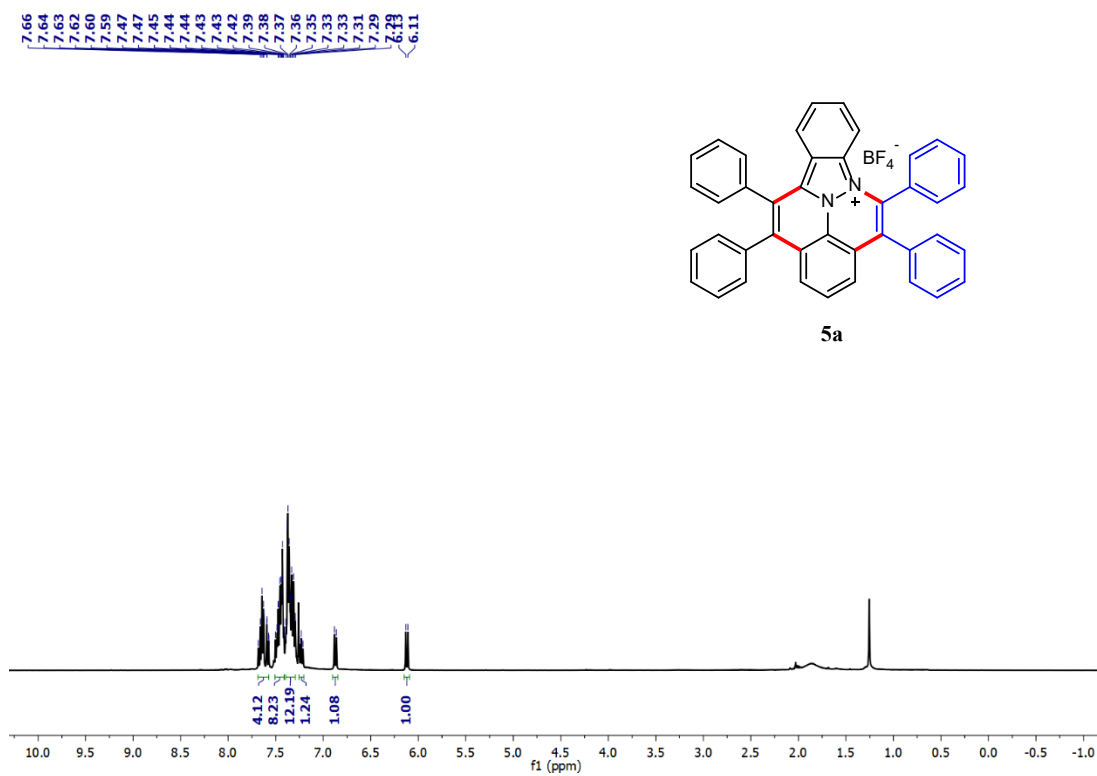

Figure S52:  $^1\text{H}$  NMR spectrum of compound **5a** in  $\text{CDCl}_3$

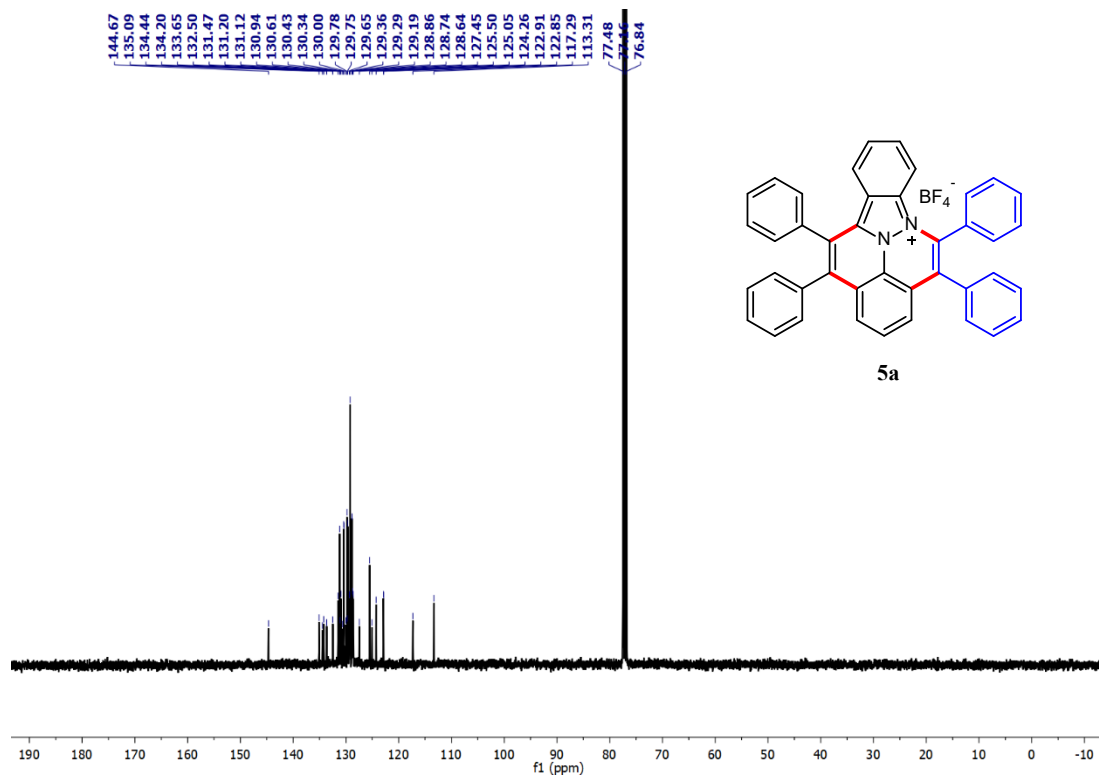

Figure S53:  $^{13}\text{C}$  NMR spectrum of compound **5a** in  $\text{CDCl}_3$

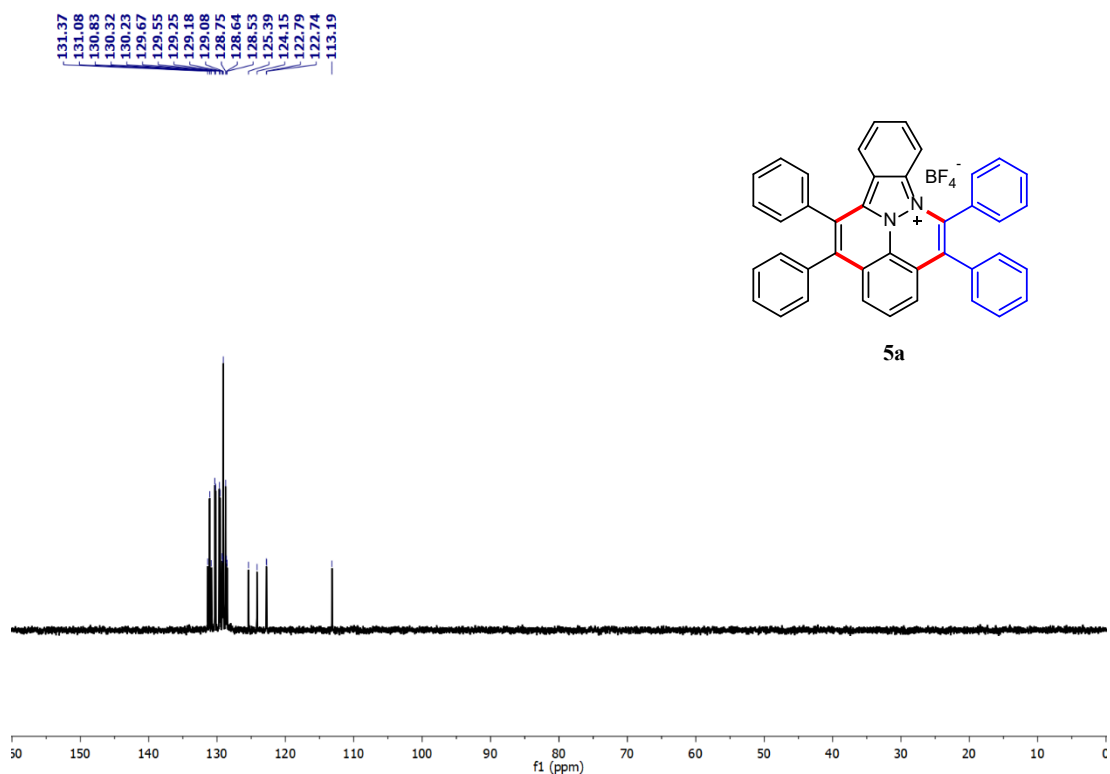

**Figure S54:** DEPT-135 NMR spectrum of compound **5a** in  $\text{CDCl}_3$

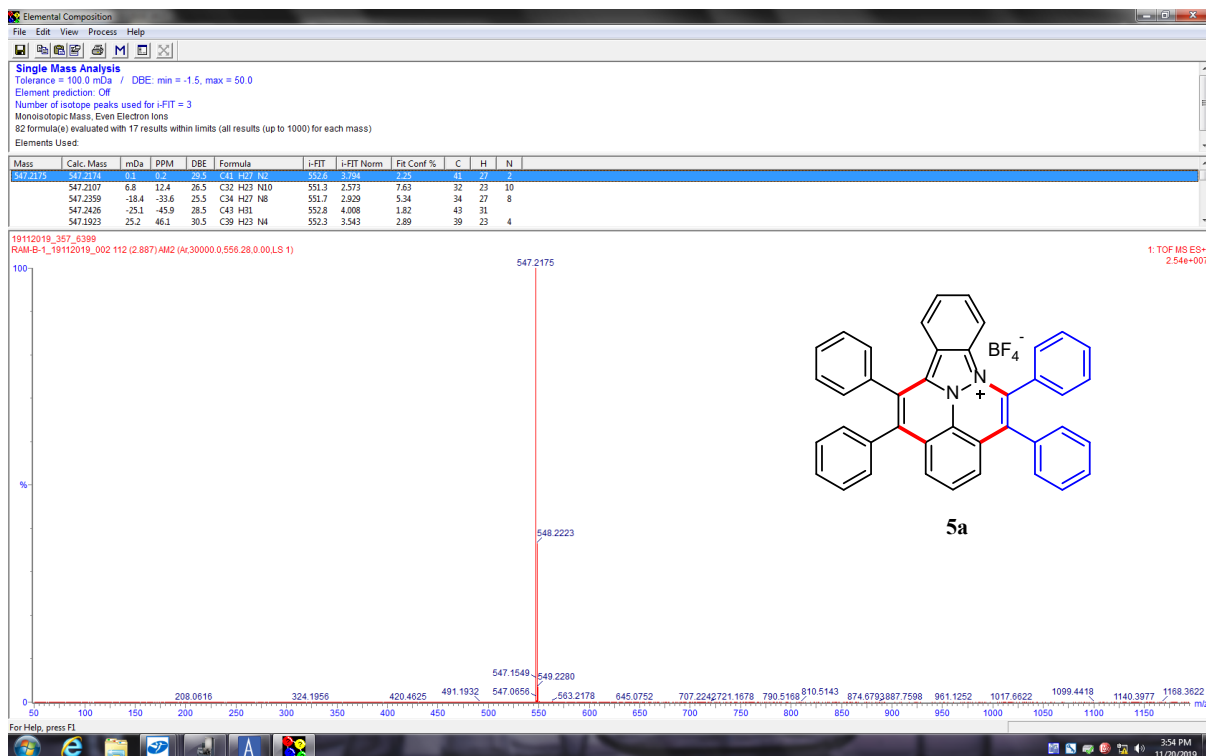

**Figure S55:** HRMS spectrum of compound **5a**

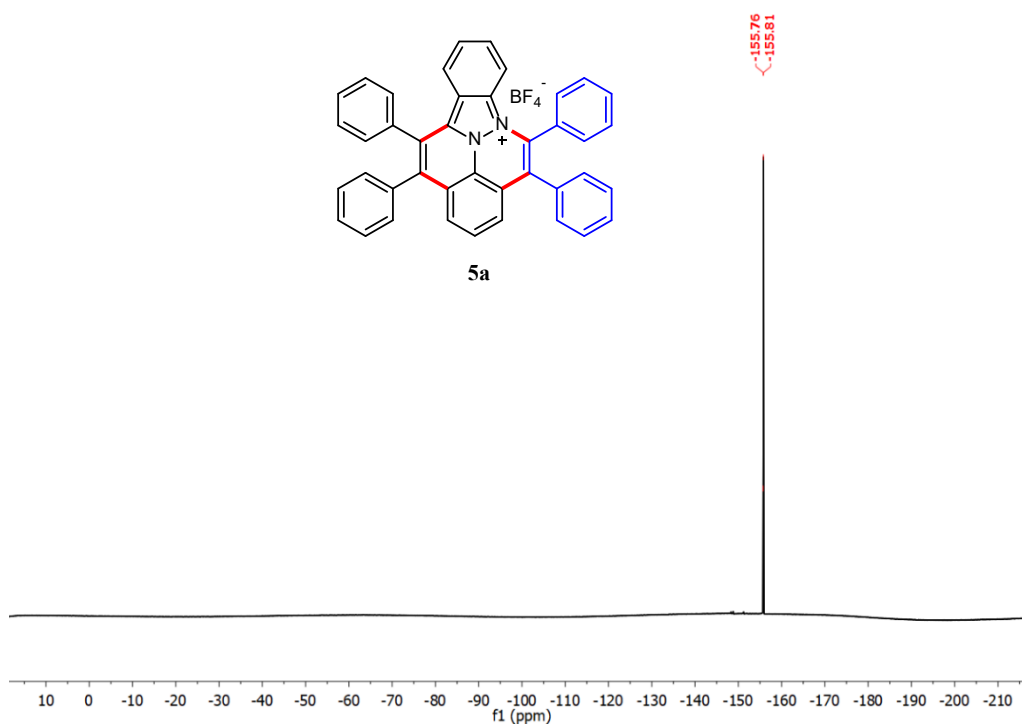

Figure S56: <sup>19</sup>F spectrum of compound 5a

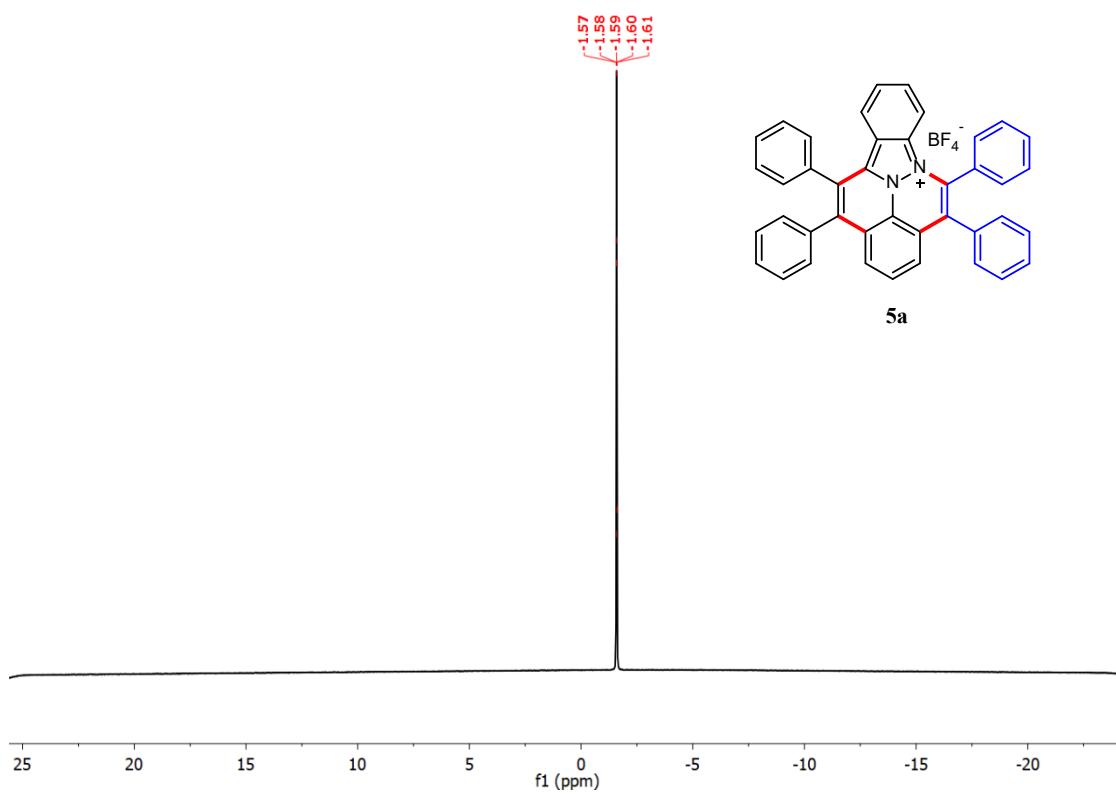

Figure S57: <sup>11</sup>B spectrum of compound 5a

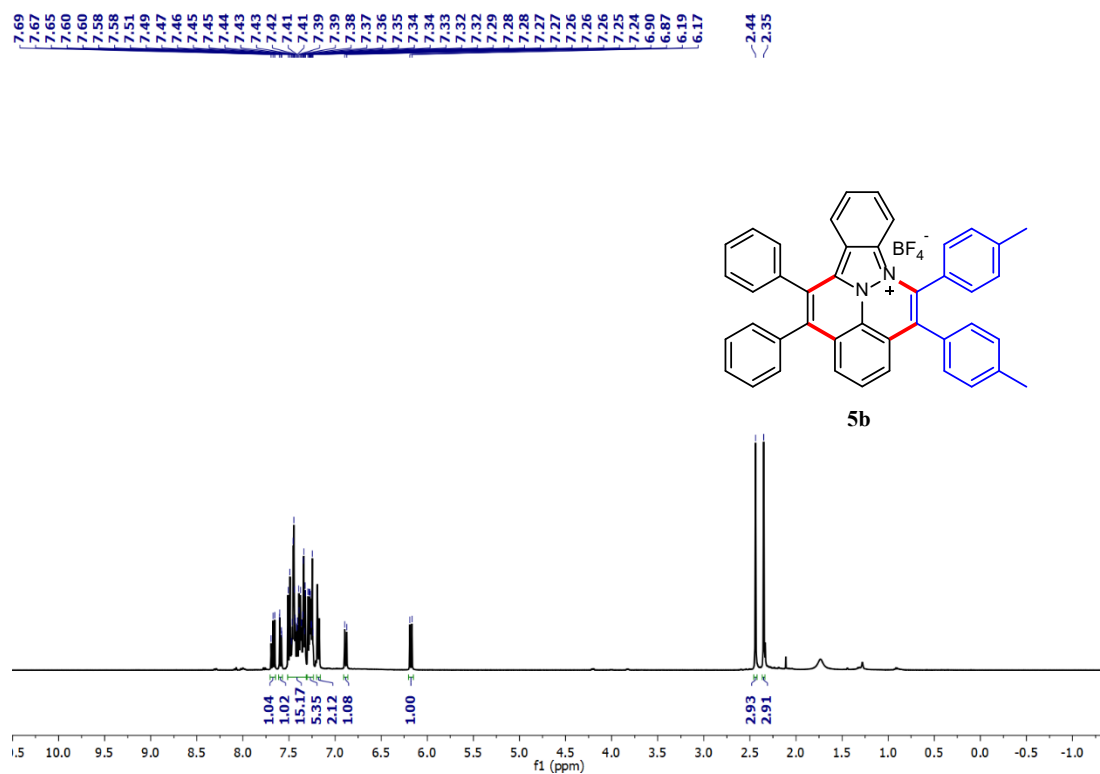

Figure S58:  $^1\text{H}$  NMR spectrum of compound **5b** in  $\text{CDCl}_3$

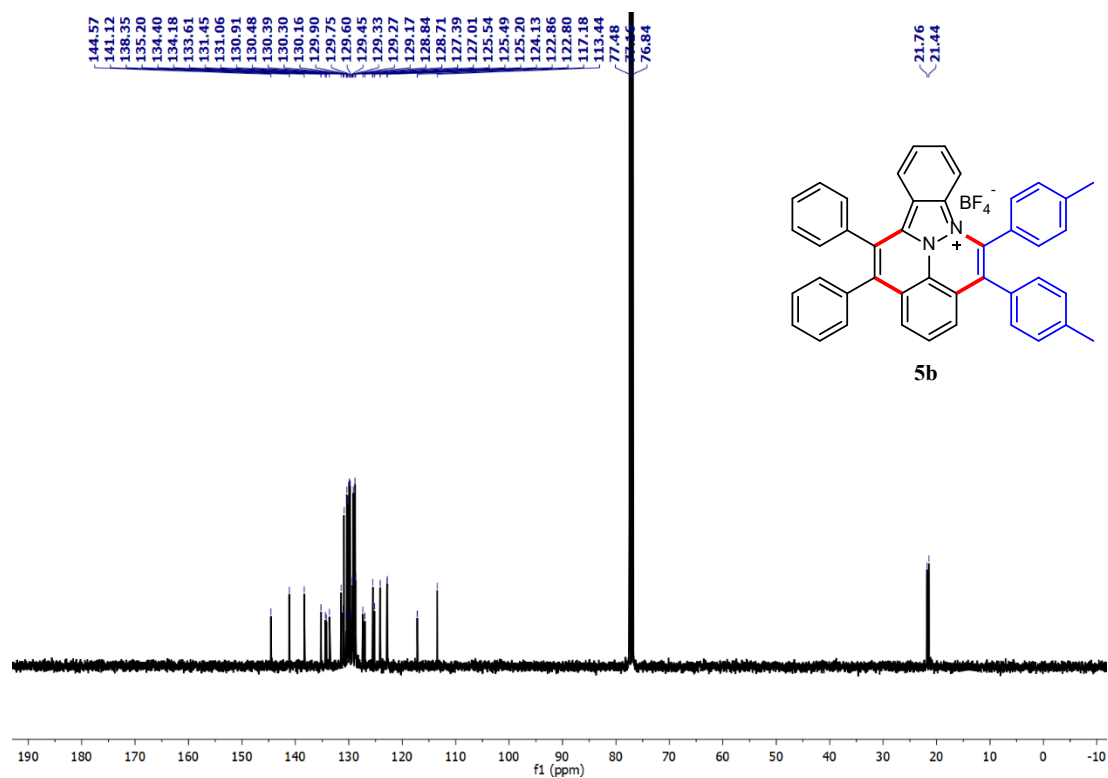

Figure S59:  $^{13}\text{C}$  NMR spectrum of compound **5b** in  $\text{CDCl}_3$

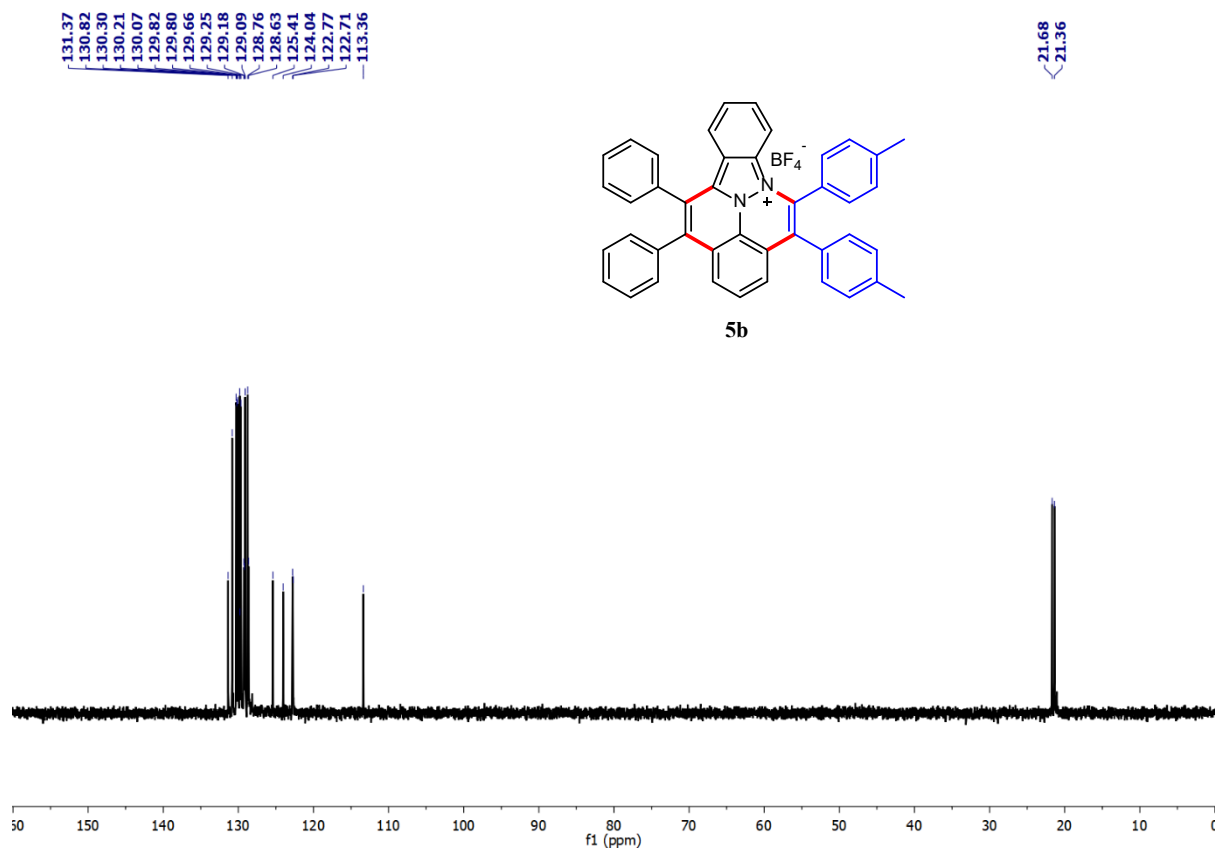

Figure S60: DEPT-135 NMR spectrum of compound **5b** in  $\text{CDCl}_3$

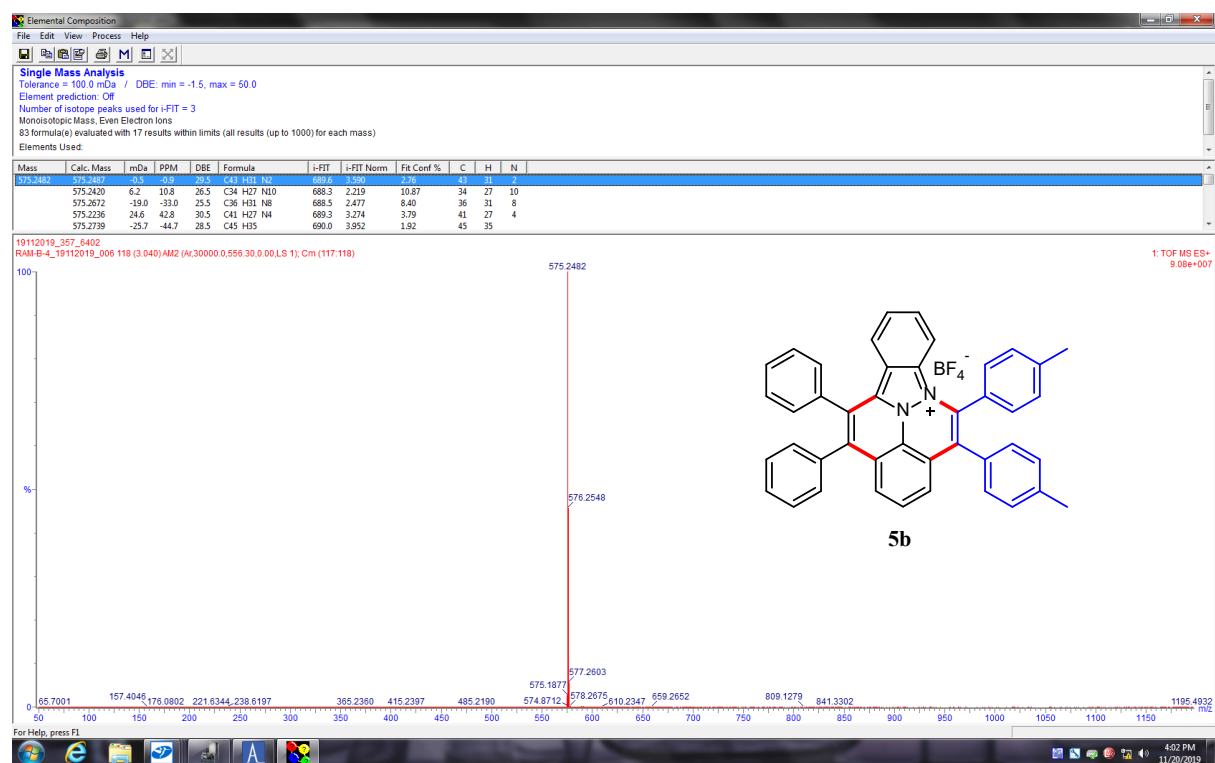

Figure S61: HRMS spectrum of compound **5b**



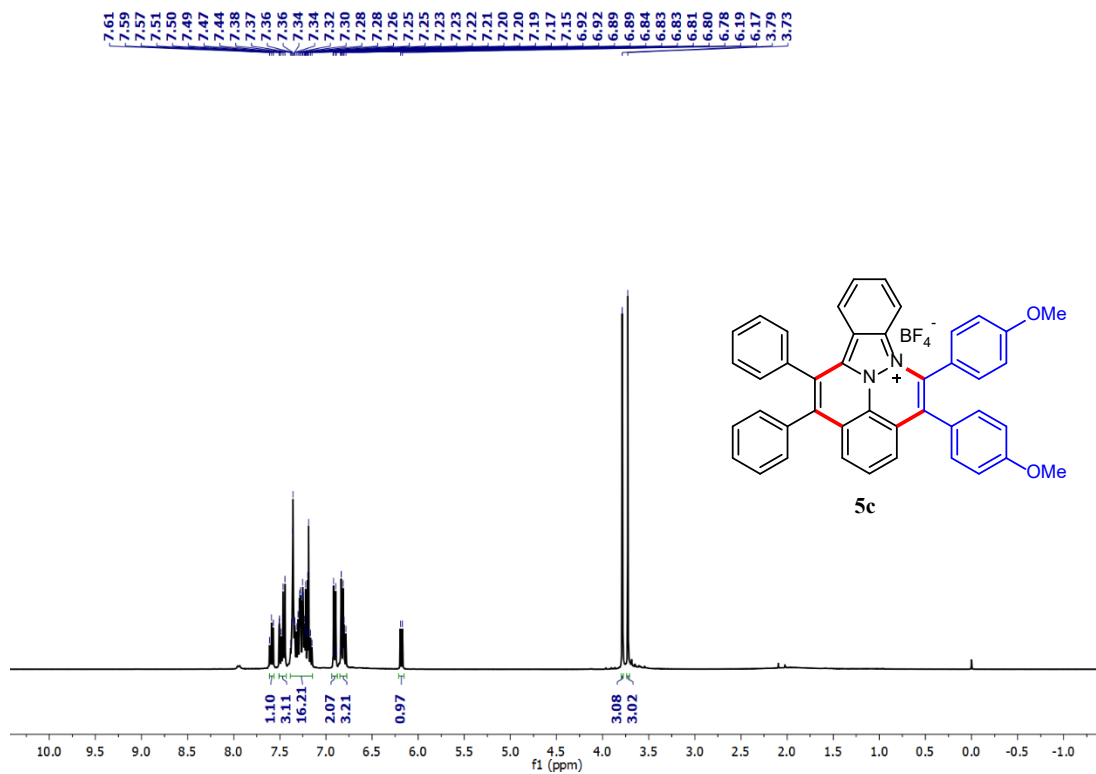

Figure S62: <sup>1</sup>H NMR spectrum of compound **5c** in CDCl<sub>3</sub>

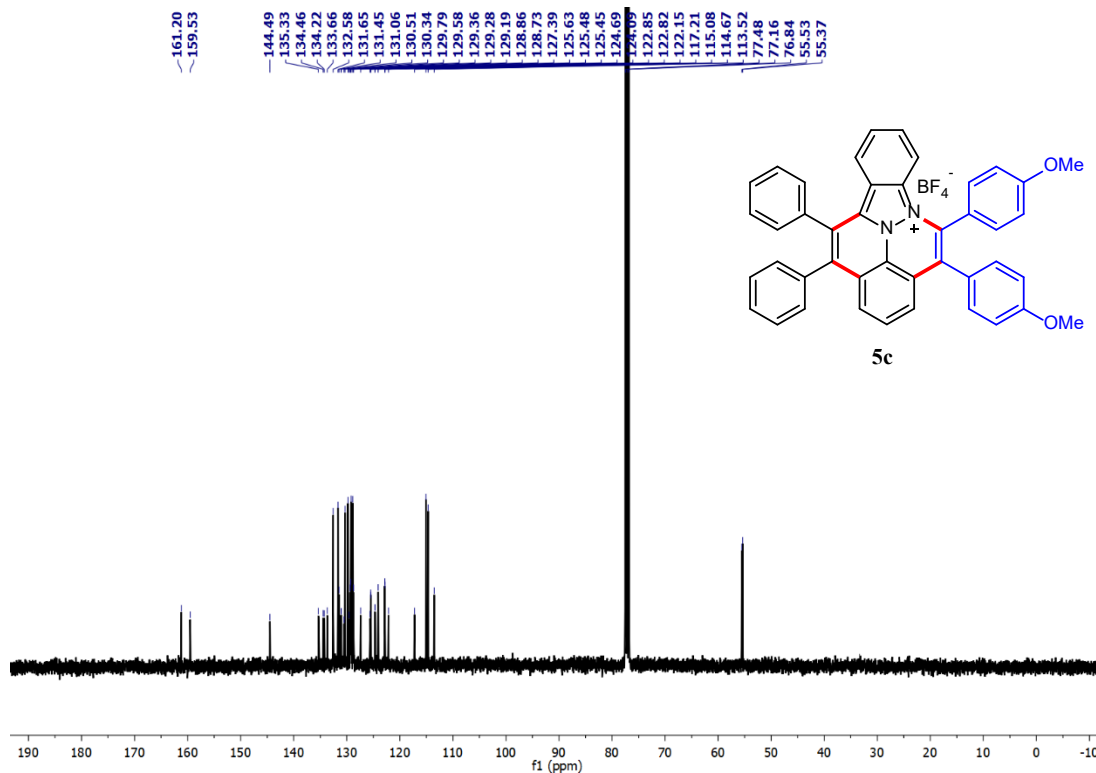

Figure S63: <sup>13</sup>C NMR spectrum of compound **5c** in CDCl<sub>3</sub>

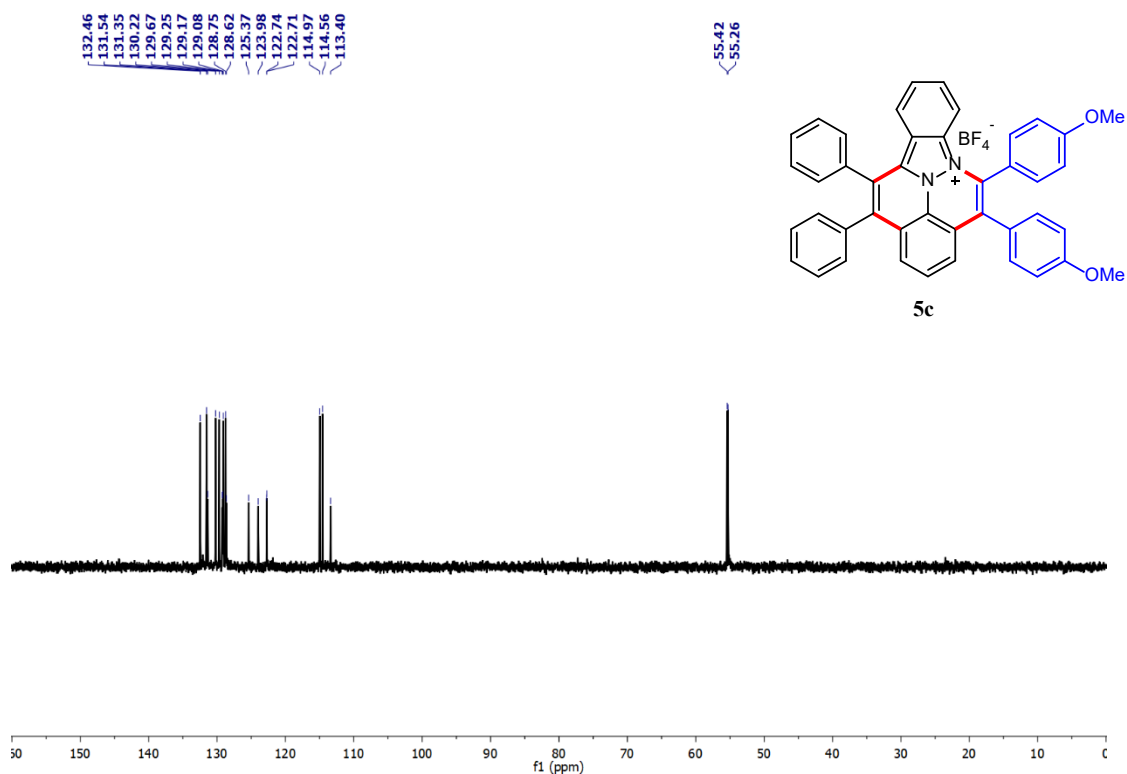

Figure S64: DEPT-135 NMR spectrum of compound **5c** in  $\text{CDCl}_3$

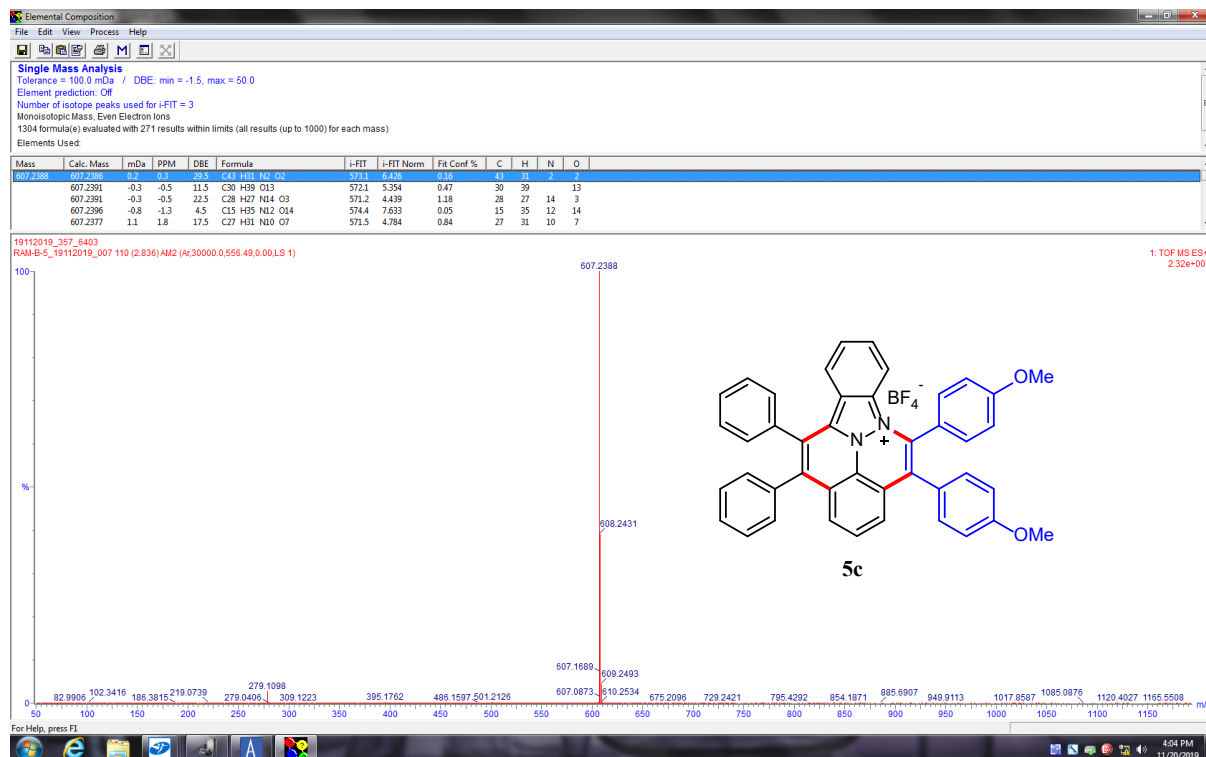

Figure S65: HRMS spectrum of compound **5c**

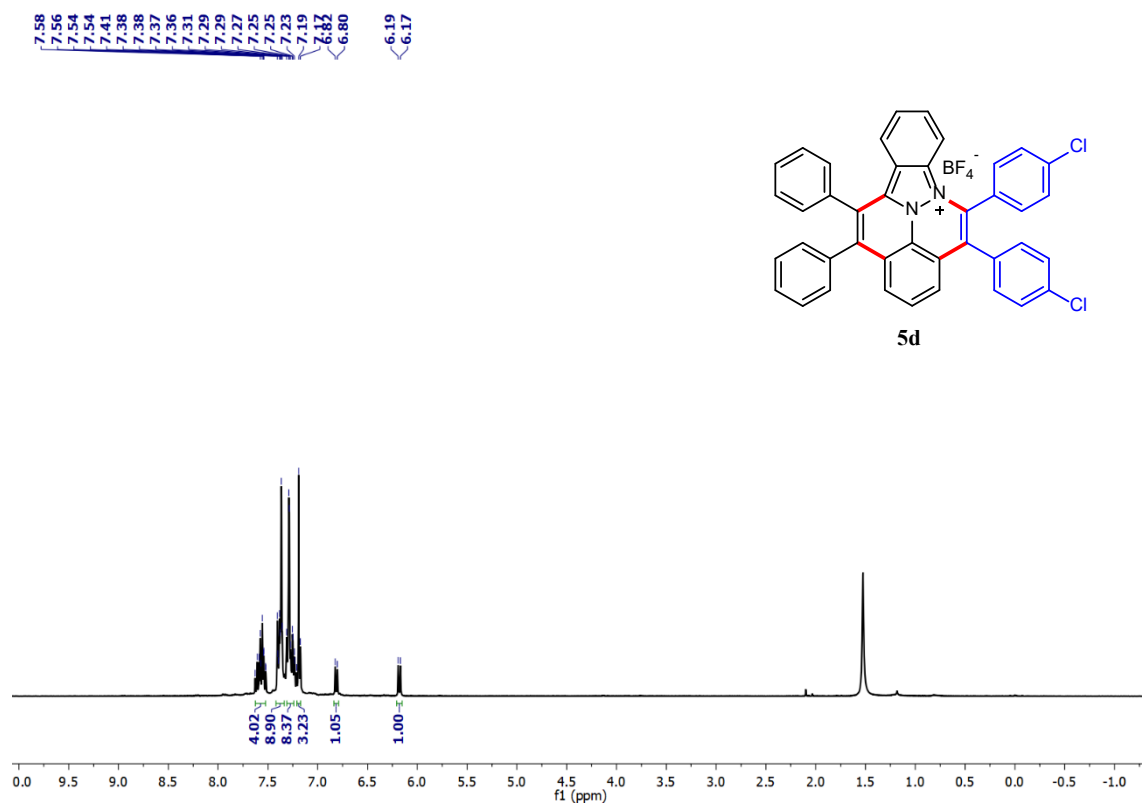

**Figure S66:**  $^1\text{H}$  NMR spectrum of compound **5d** in  $\text{CDCl}_3$

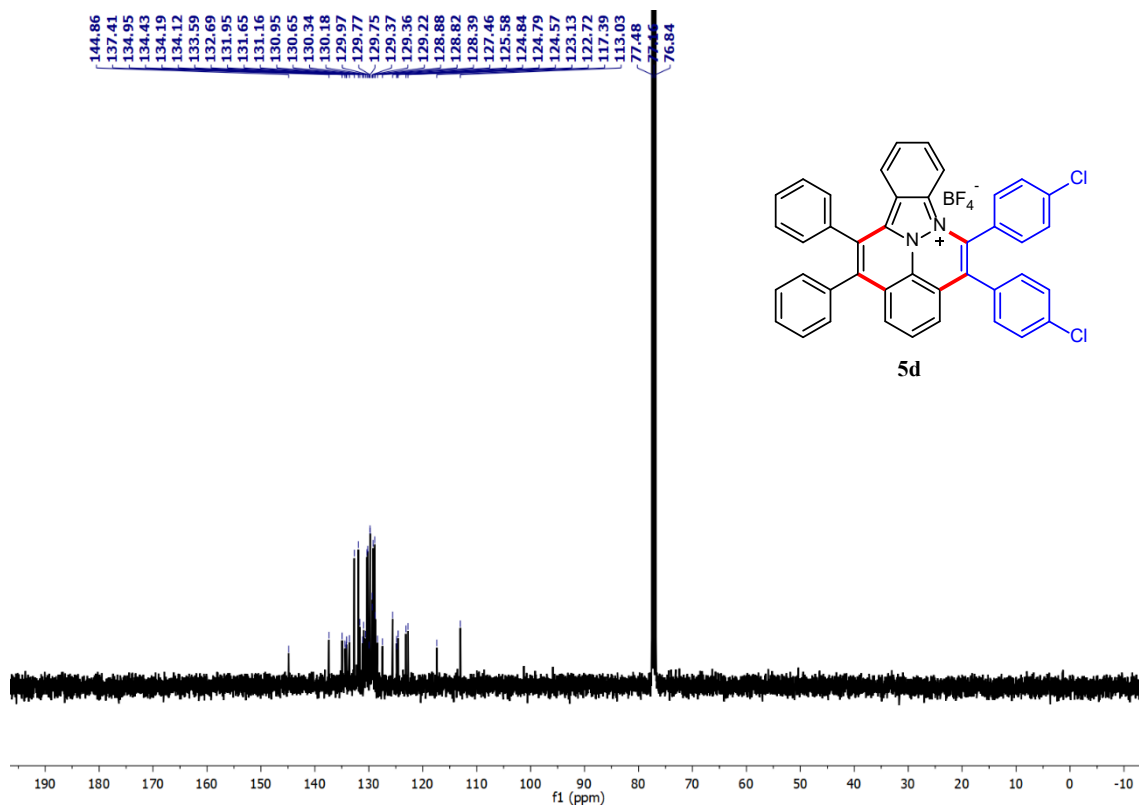

**Figure S67:**  $^{13}\text{C}$  NMR spectrum of compound **5d** in  $\text{CDCl}_3$

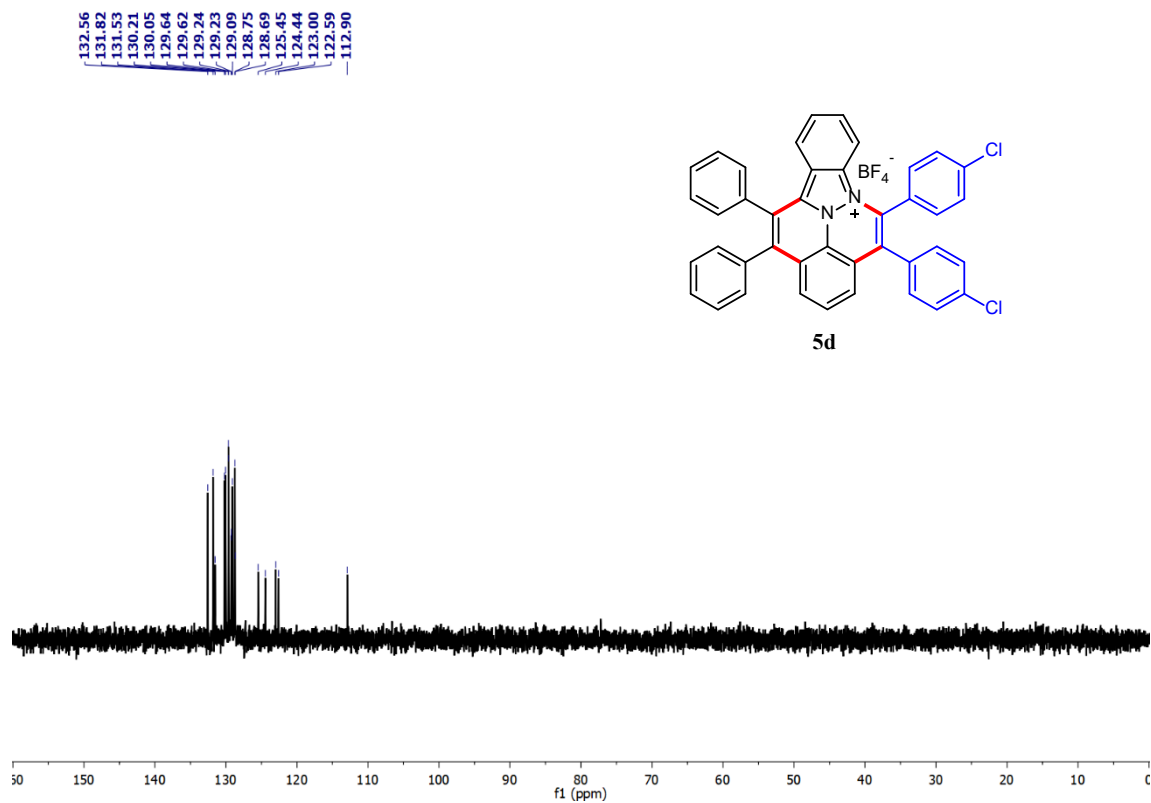

**Figure S68:** DEPT-135 NMR spectrum of compound **5d** in  $\text{CDCl}_3$

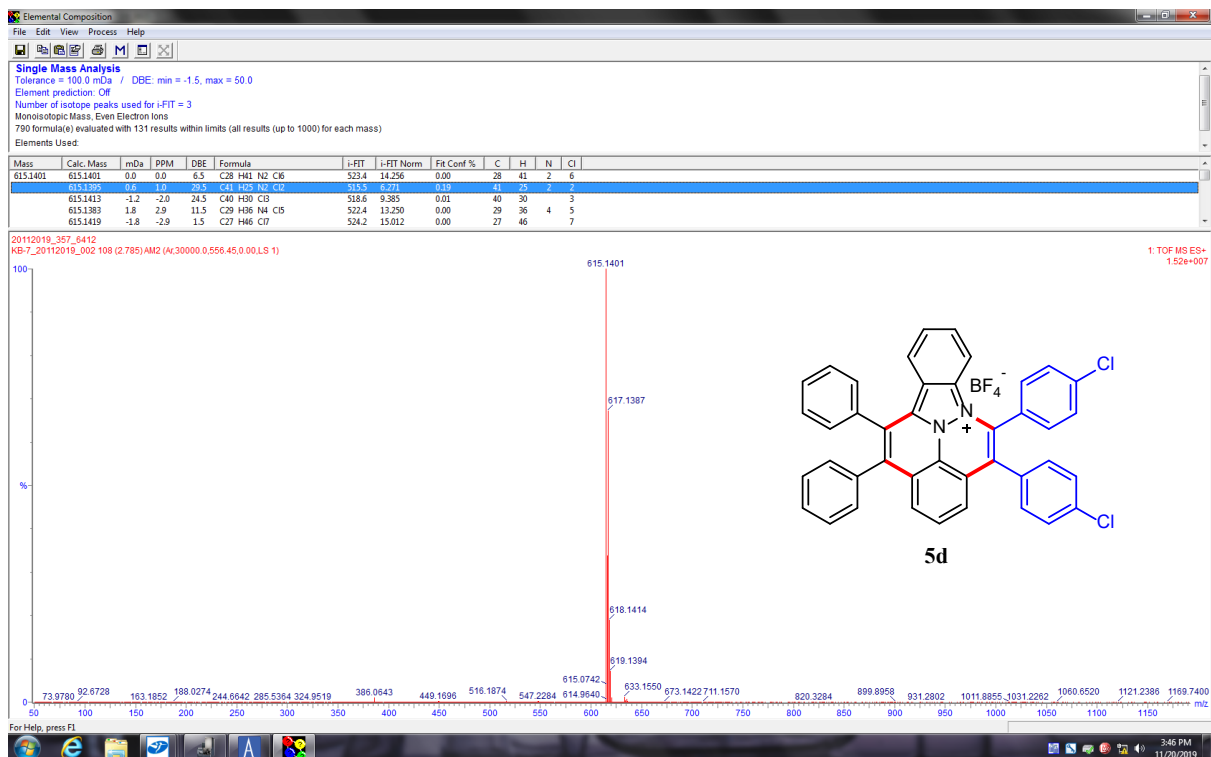

**Figure S69:** HRMS spectrum of compound **5d**

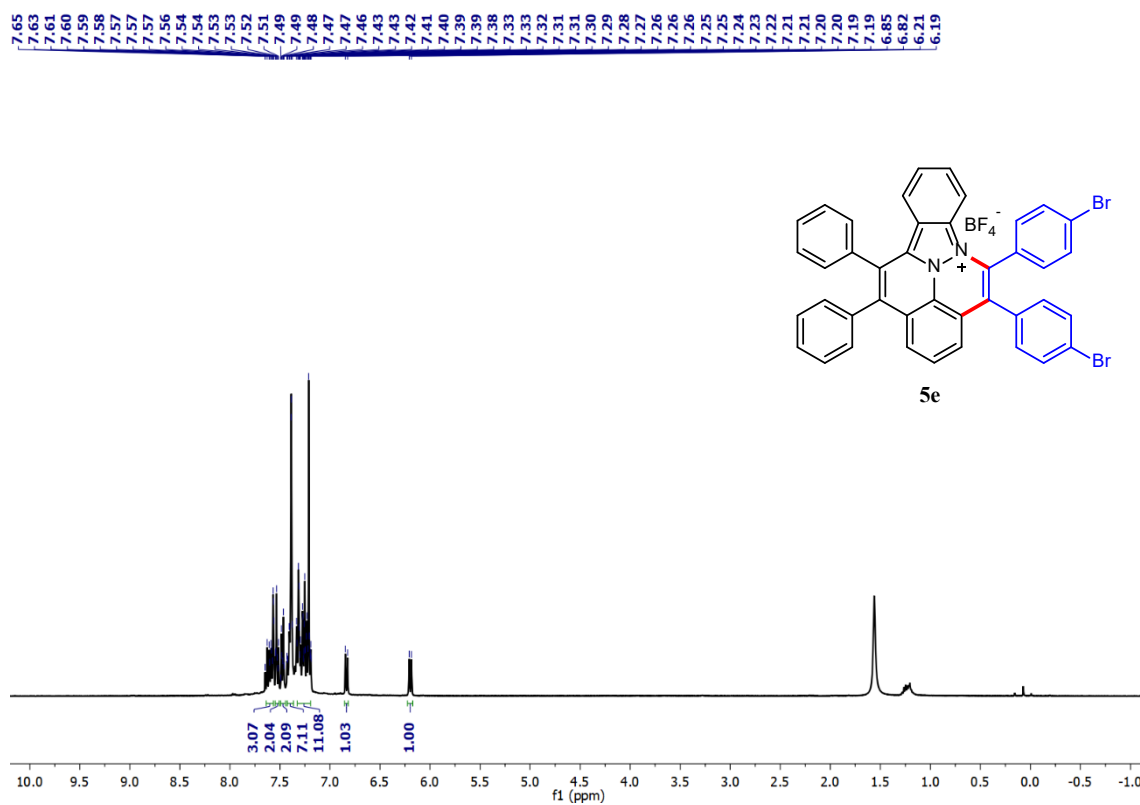

Figure S70:  $^1\text{H}$  NMR spectrum of compound **5e** in  $\text{CDCl}_3$

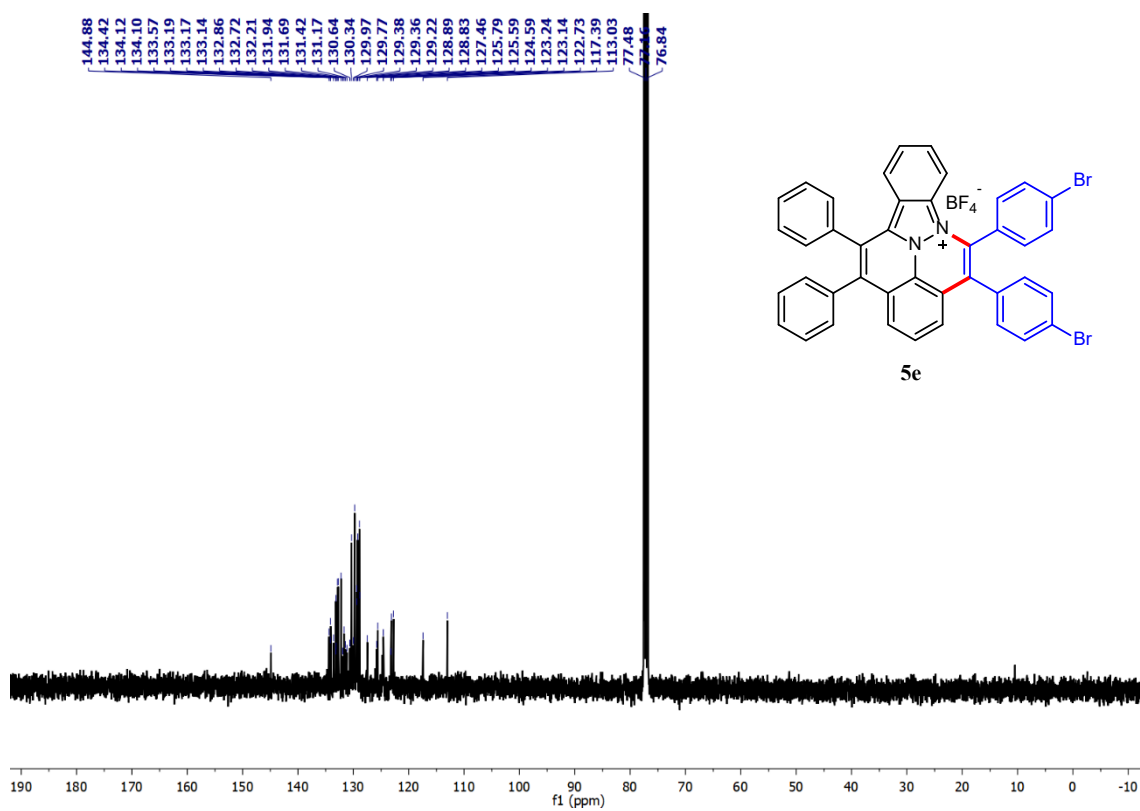

Figure S71:  $^{13}\text{C}$  NMR spectrum of compound **5e** in  $\text{CDCl}_3$

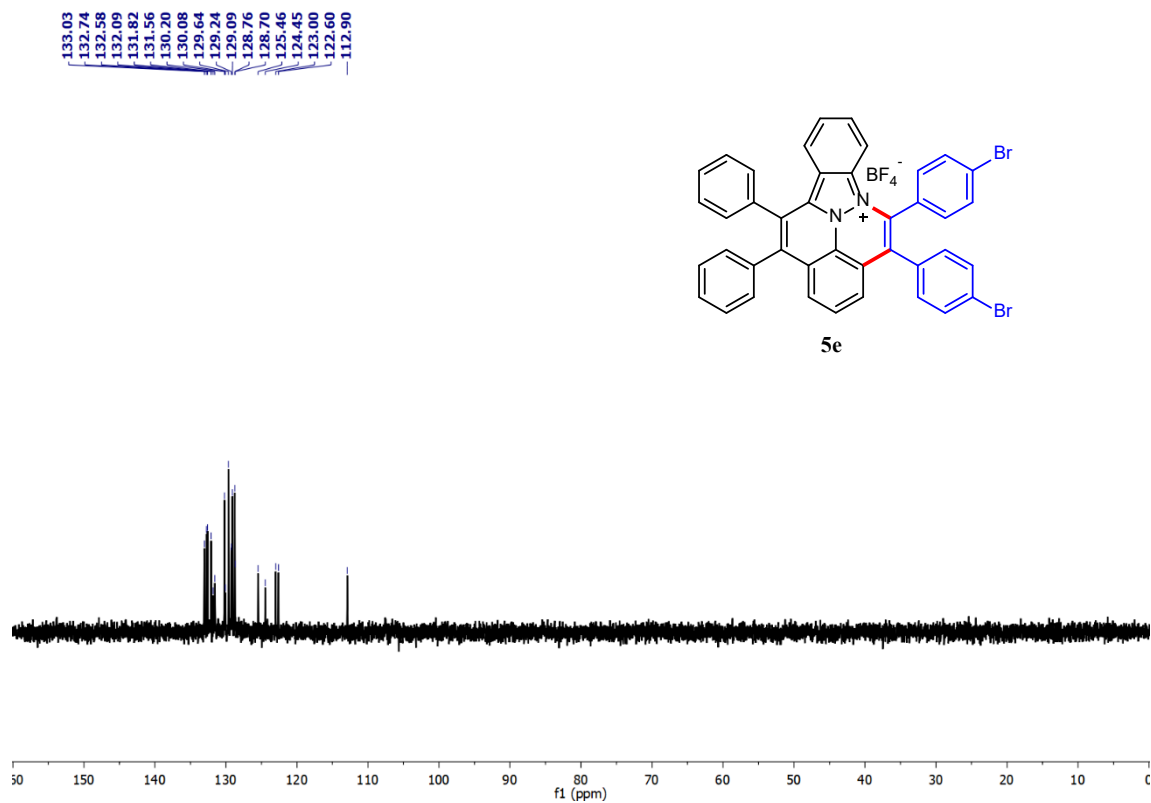

Figure S72: DEPT-135 NMR spectrum of compound **5e** in  $\text{CDCl}_3$

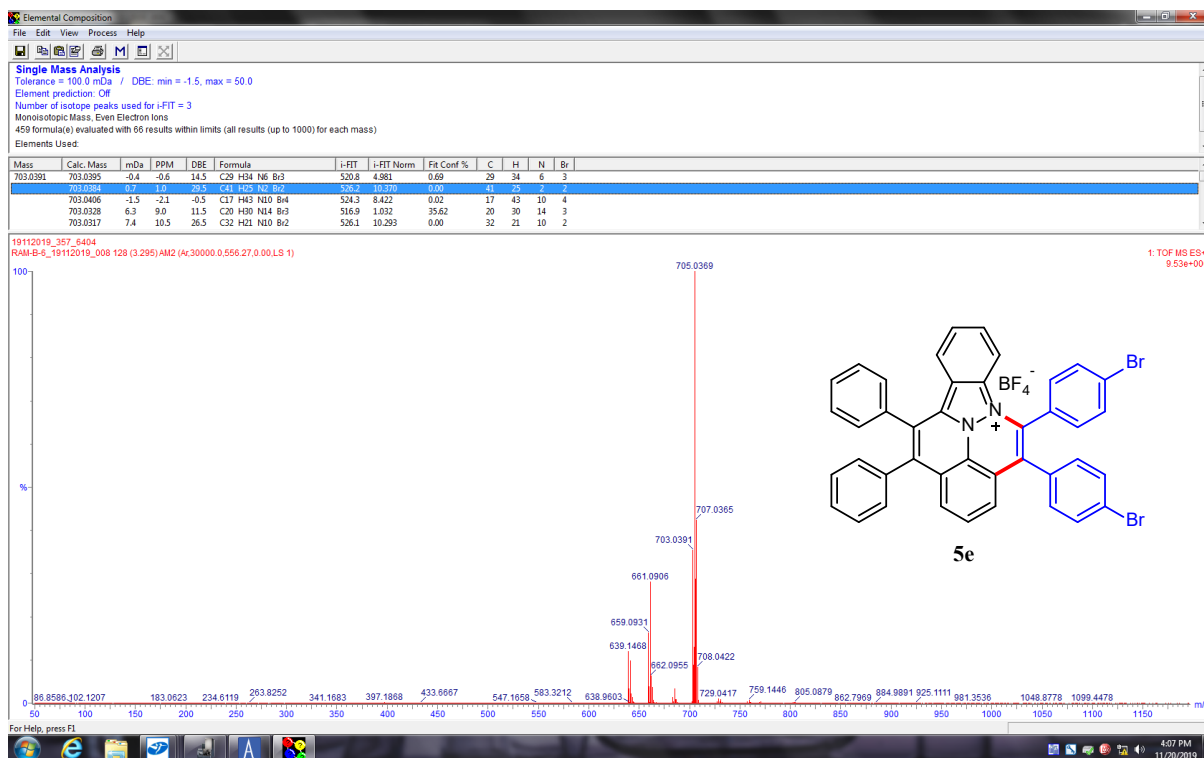

Figure S73: HRMS spectrum of compound **5e**

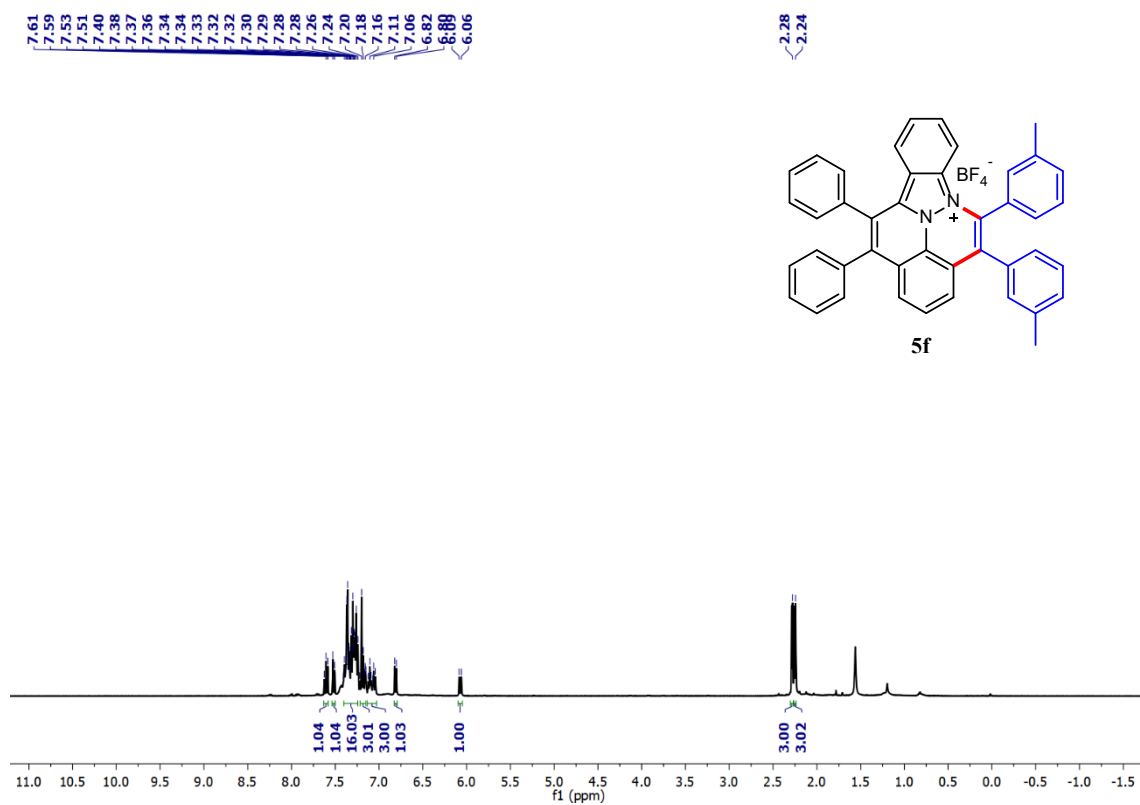

Figure S74:  $^1\text{H}$  NMR spectrum of compound **5f** in  $\text{CDCl}_3$

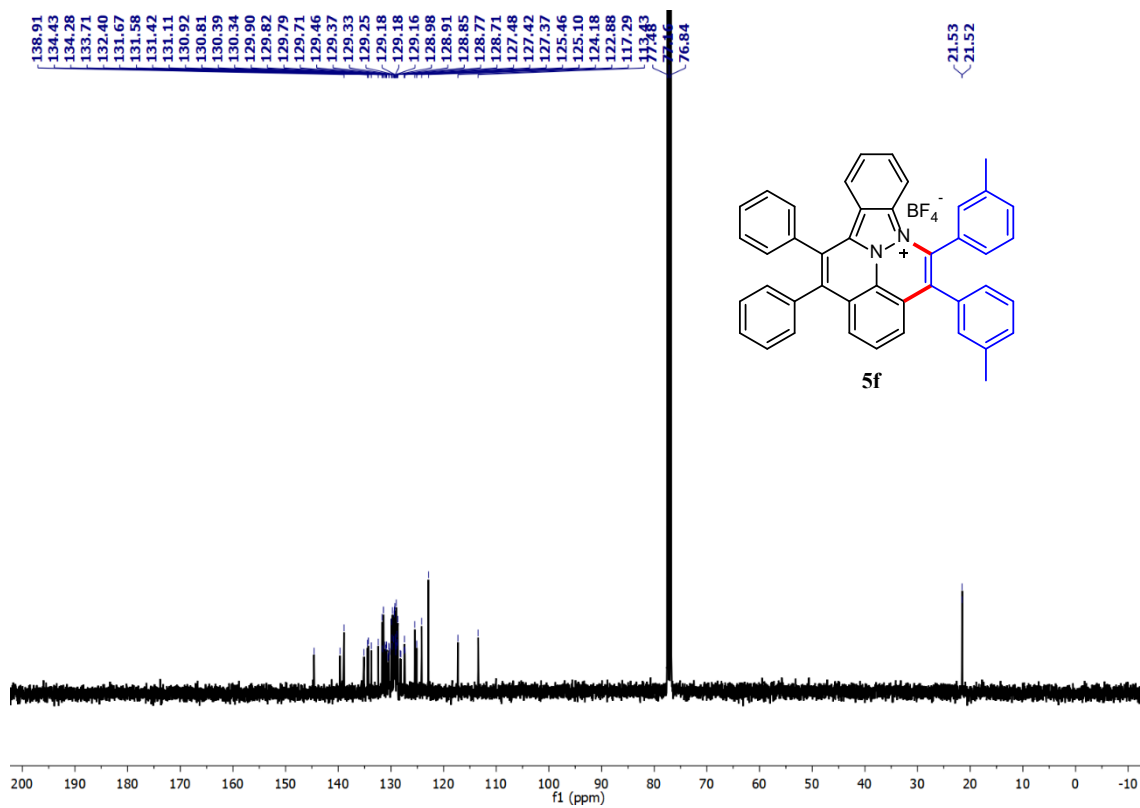

Figure S74:  $^{13}\text{C}$  NMR spectrum of compound **5f** in  $\text{CDCl}_3$

131.56  
131.45  
131.31  
130.79  
130.69  
130.37  
130.27  
130.22  
130.12  
129.78  
129.70  
129.67  
129.59  
129.55  
129.52  
129.26  
129.22  
129.14  
129.12  
129.07  
129.05  
128.99  
128.87  
128.80  
128.73  
128.66  
128.59  
128.10  
127.98  
127.30  
127.25  
125.35  
124.06  
122.76  
113.31

21.42  
21.40

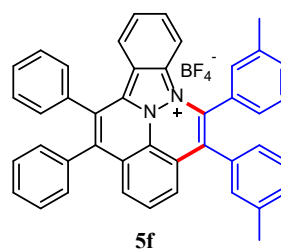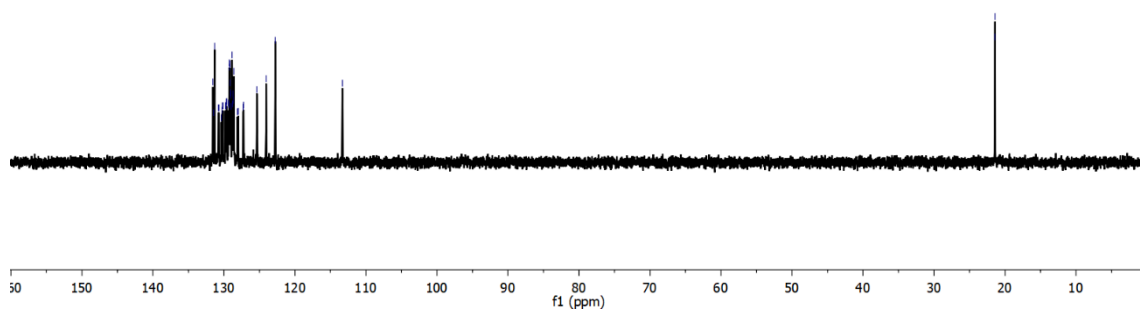

Figure S75: DEPT-135 NMR spectrum of compound **5f** in CDCl<sub>3</sub>

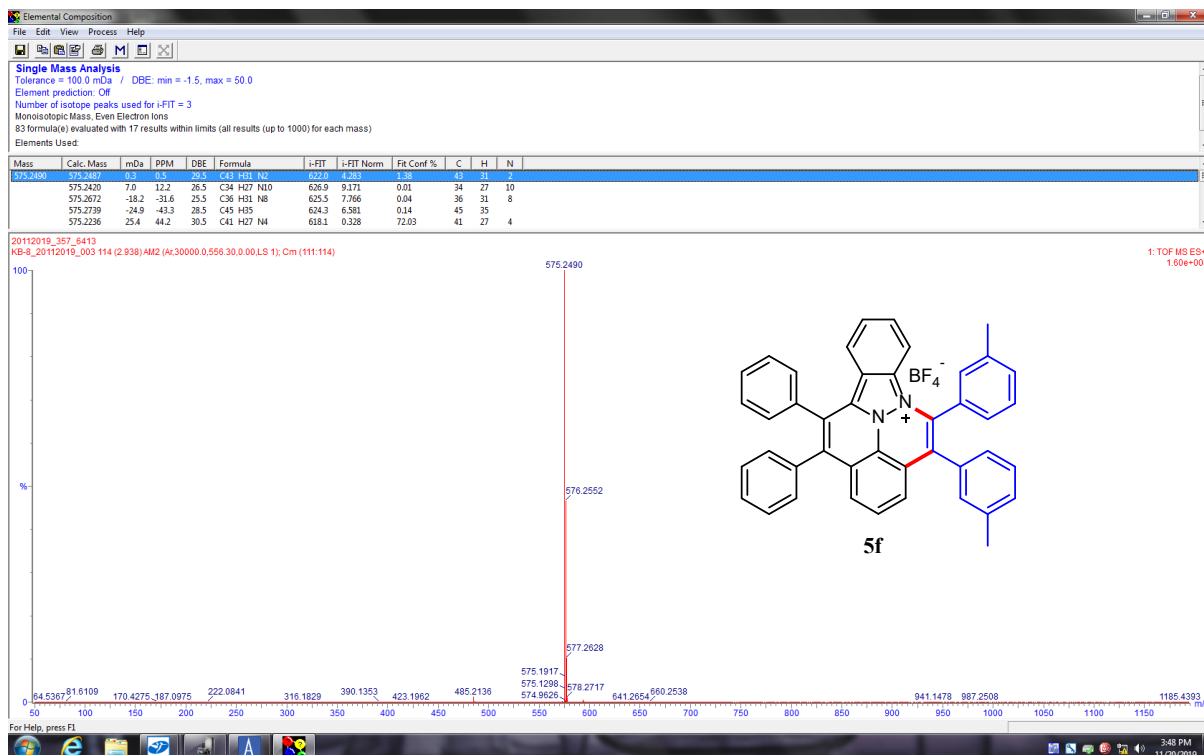

Figure S76: HRMS spectrum of compound **5f**





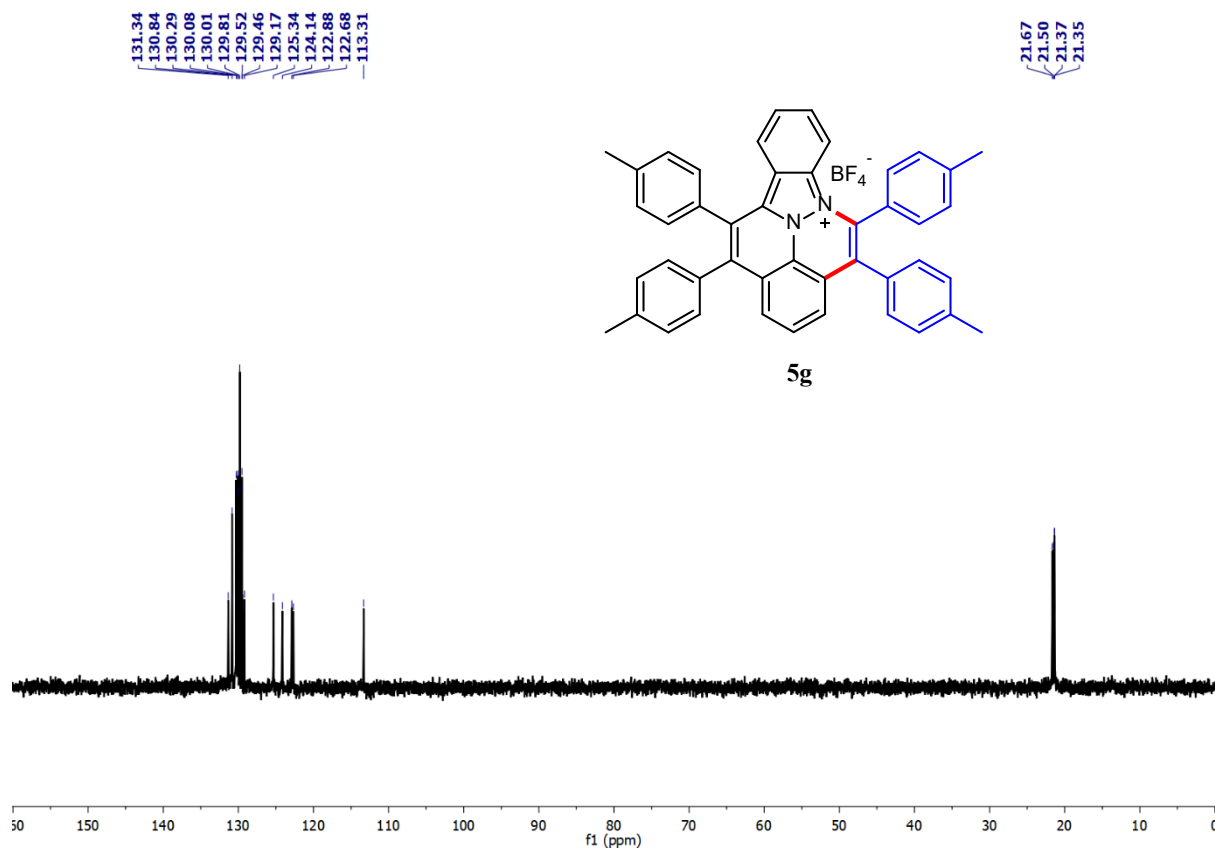

Figure S79: DEPT-135 NMR spectrum of compound **5g** in  $\text{CDCl}_3$

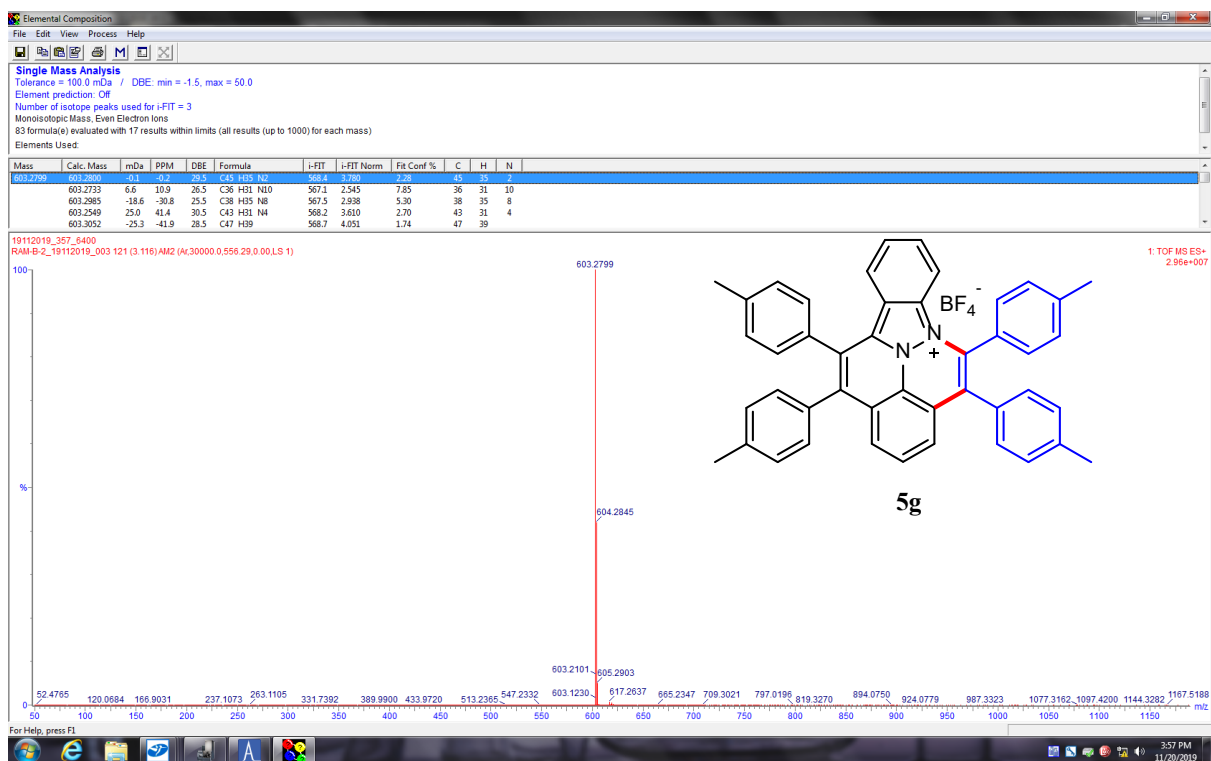

Figure S80: HRMS spectrum of compound **5g**

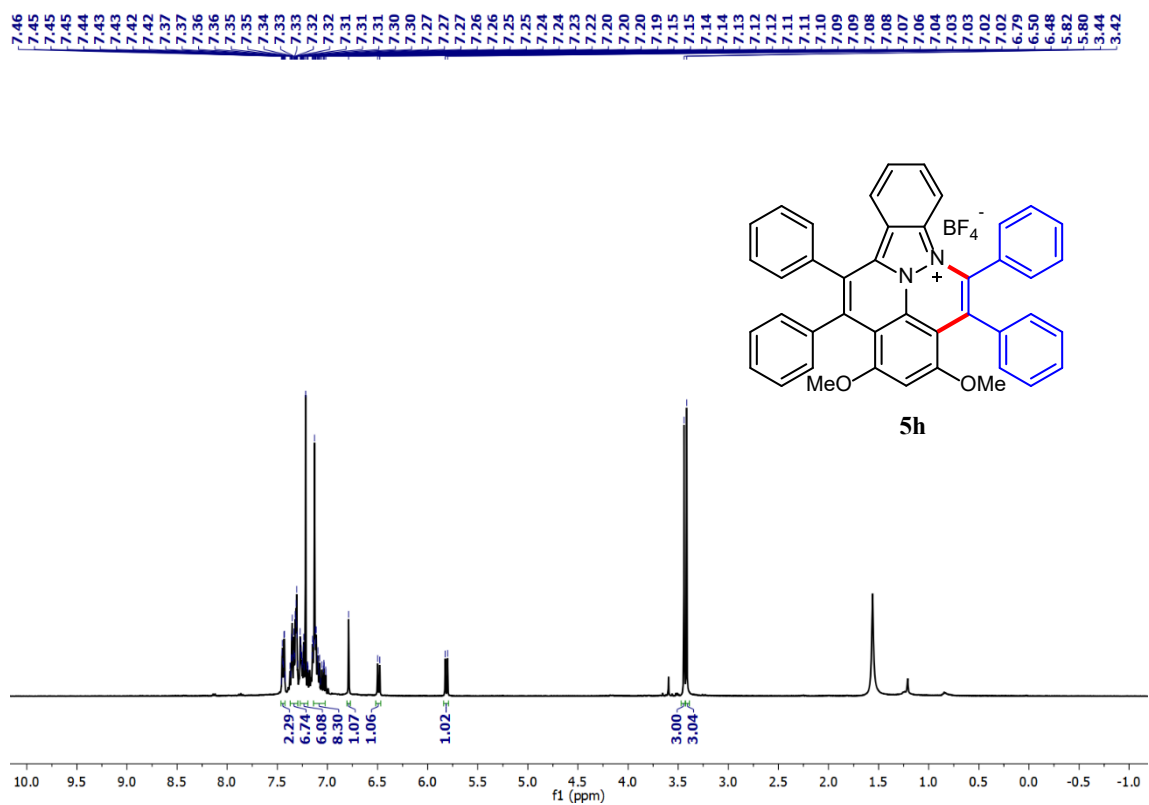

Figure S81:  $^1\text{H}$  NMR spectrum of compound **5h** in  $\text{CDCl}_3$

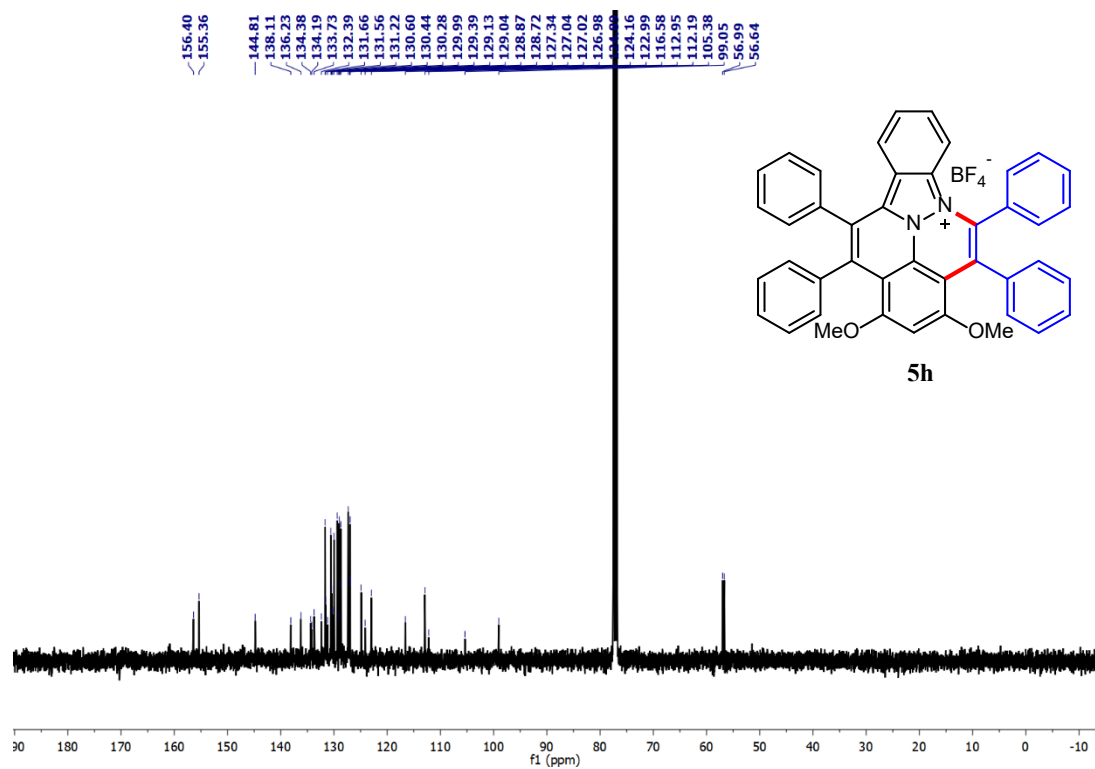

Figure S82:  $^{13}\text{C}$  NMR spectrum of compound **5h** in  $\text{CDCl}_3$

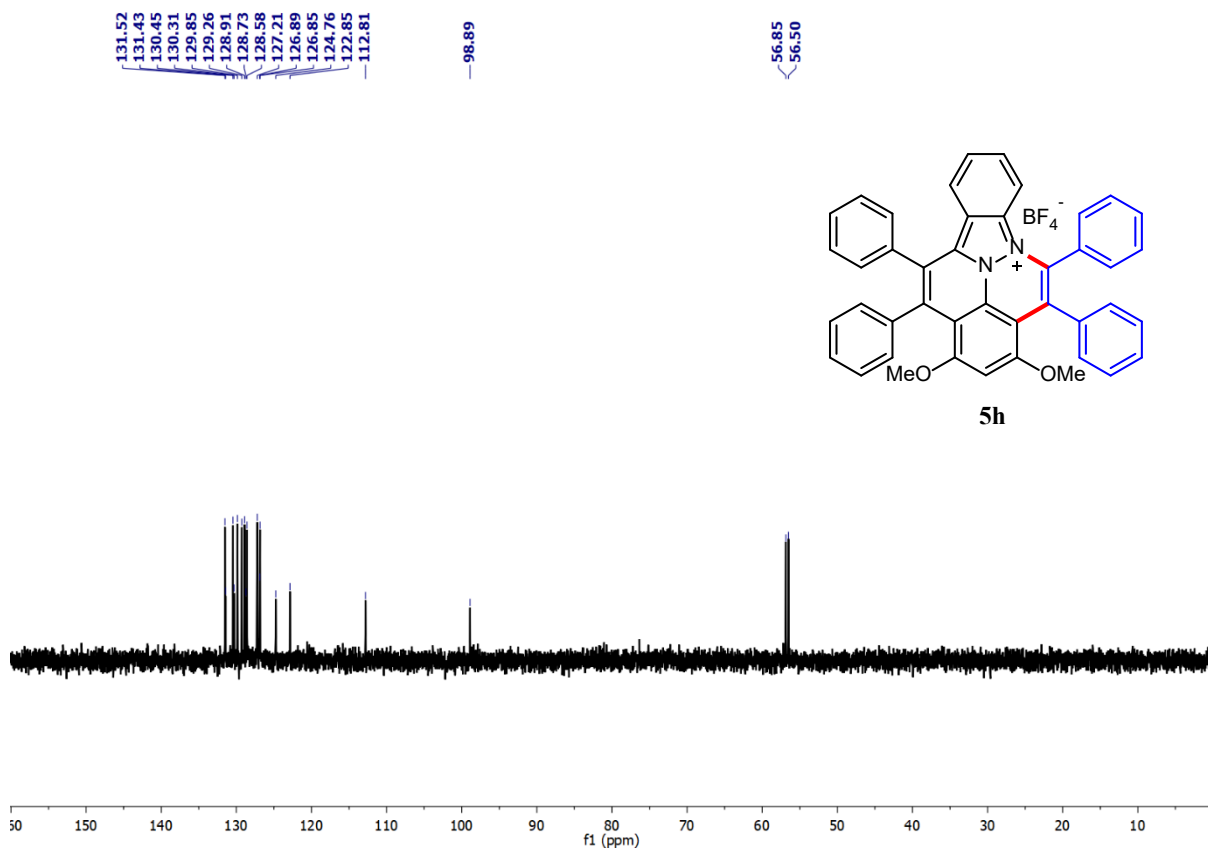

Figure S83: DEPT-135 NMR spectrum of compound **5h** in  $\text{CDCl}_3$

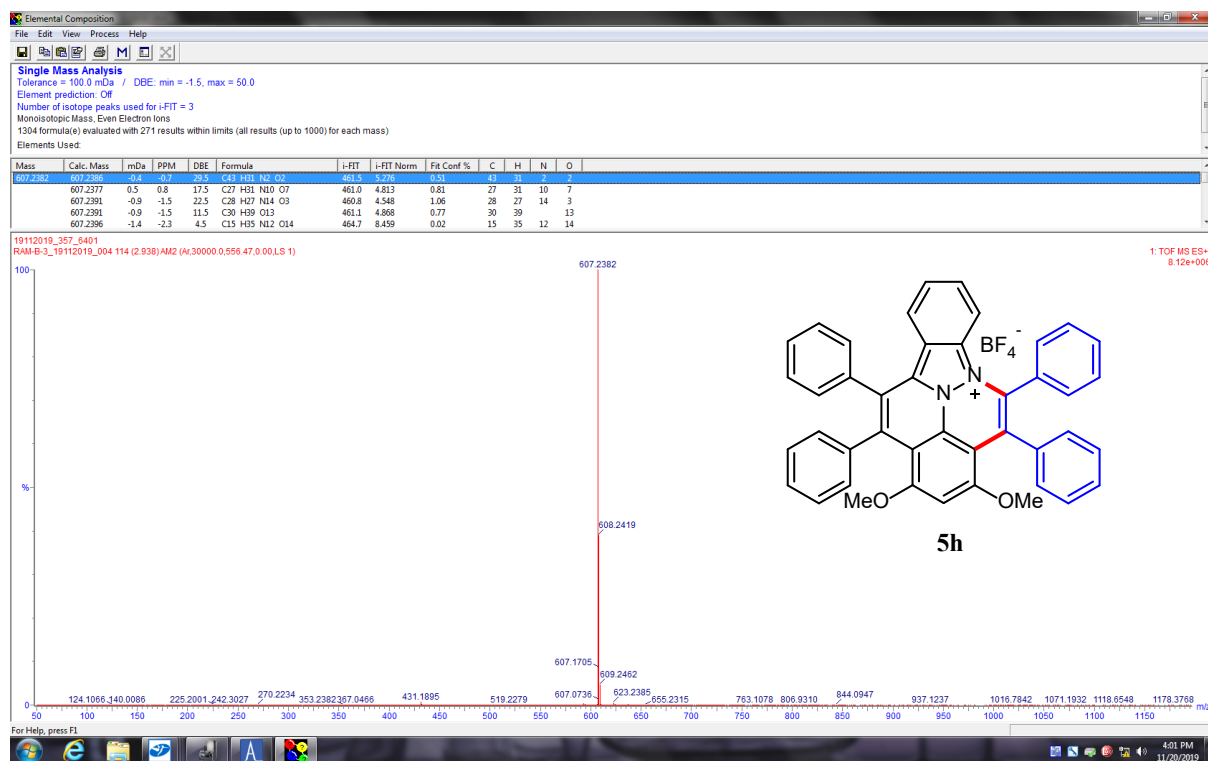

Figure S84: HRMS spectrum of compound **5h**

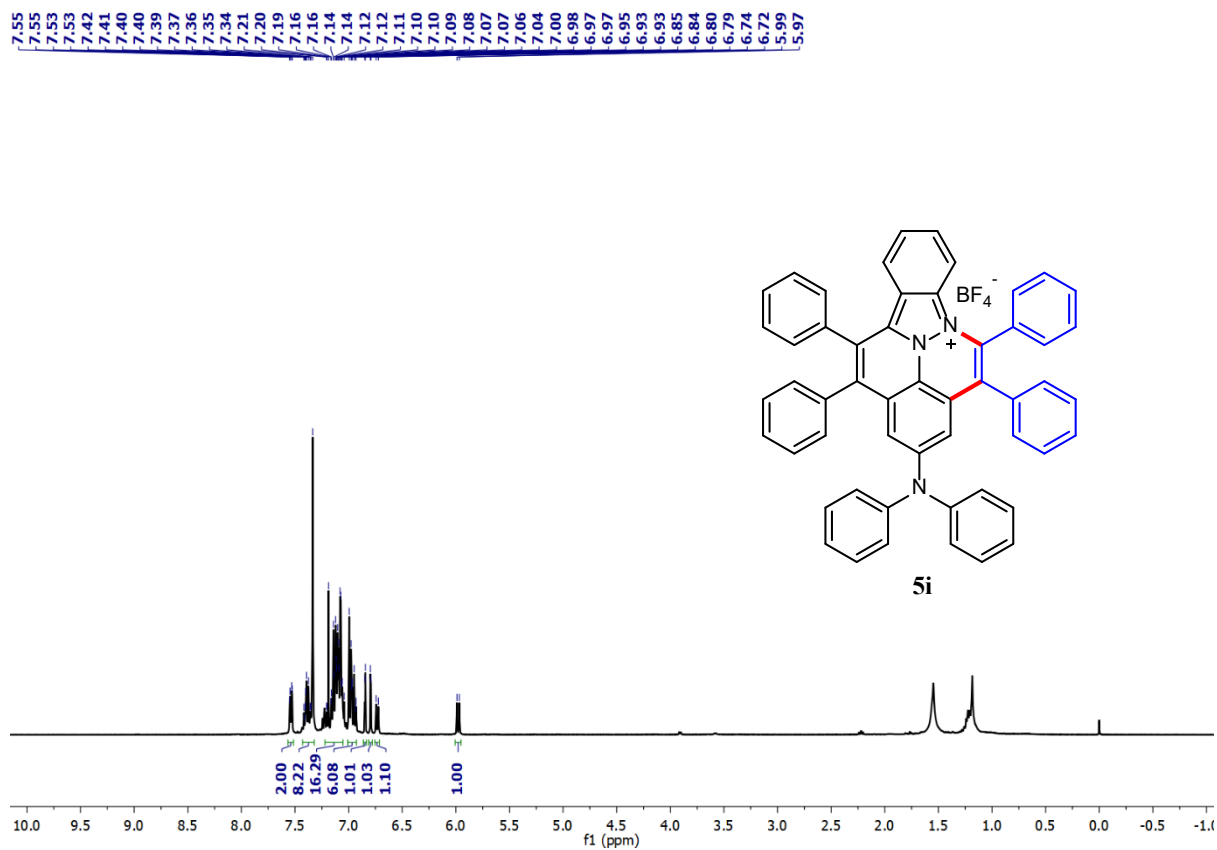

Figure S85:  $^1\text{H}$  NMR spectrum of compound **5i** in  $\text{CDCl}_3$

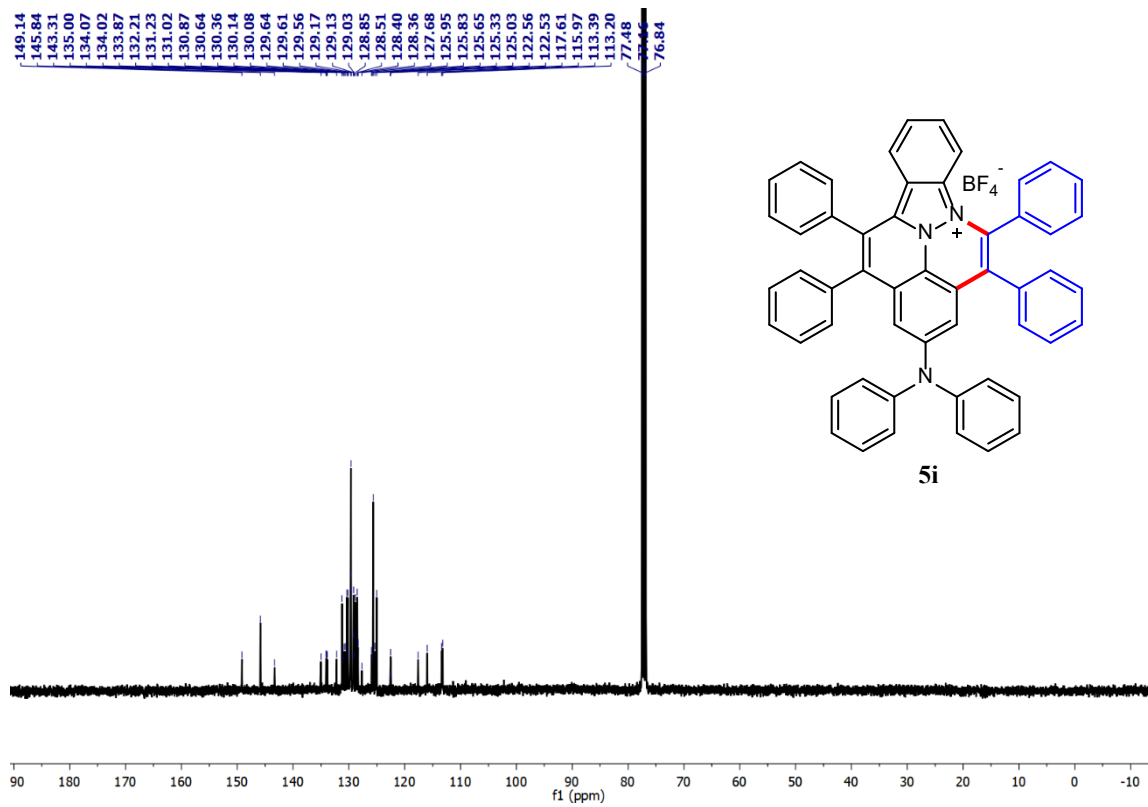

Figure S86:  $^{13}\text{C}$  NMR spectrum of compound **5i** in  $\text{CDCl}_3$

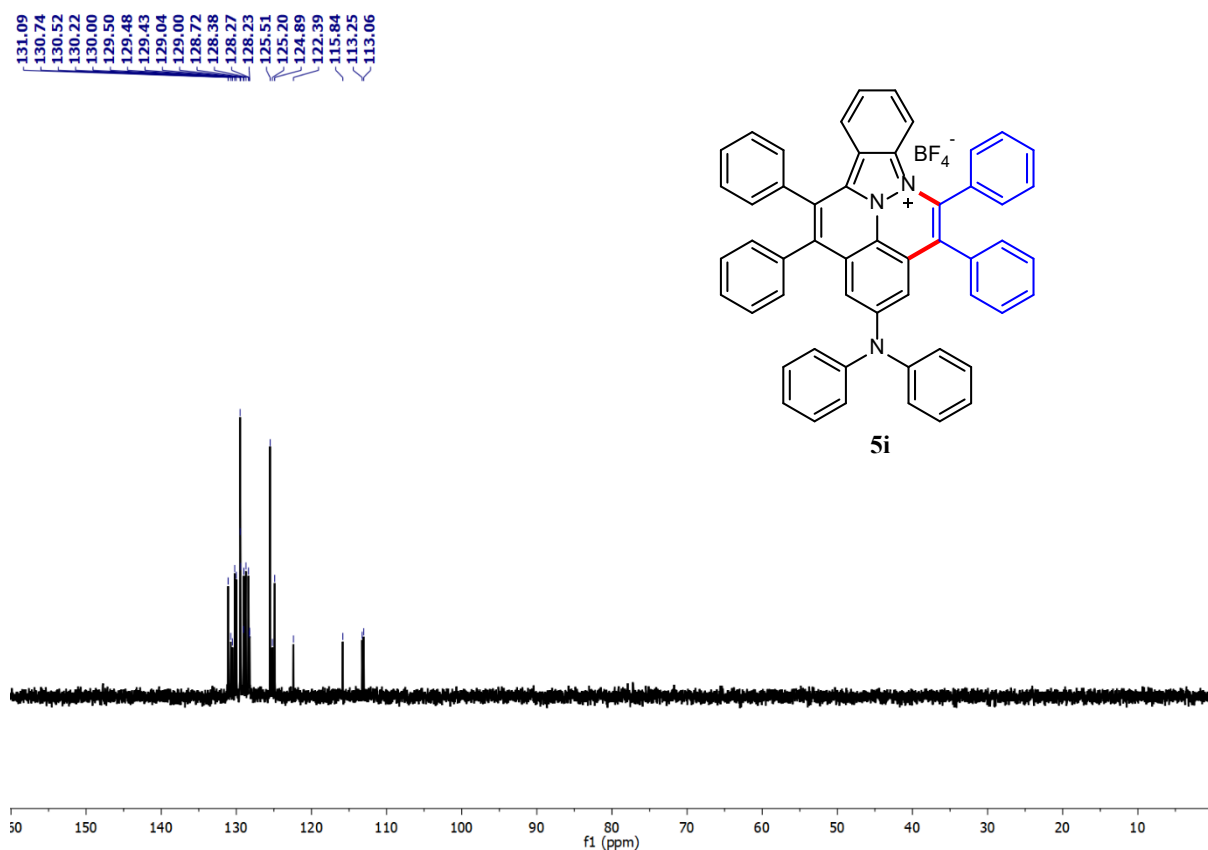

Figure S87: DEPT-135 NMR spectrum of compound **5i** in CDCl<sub>3</sub>

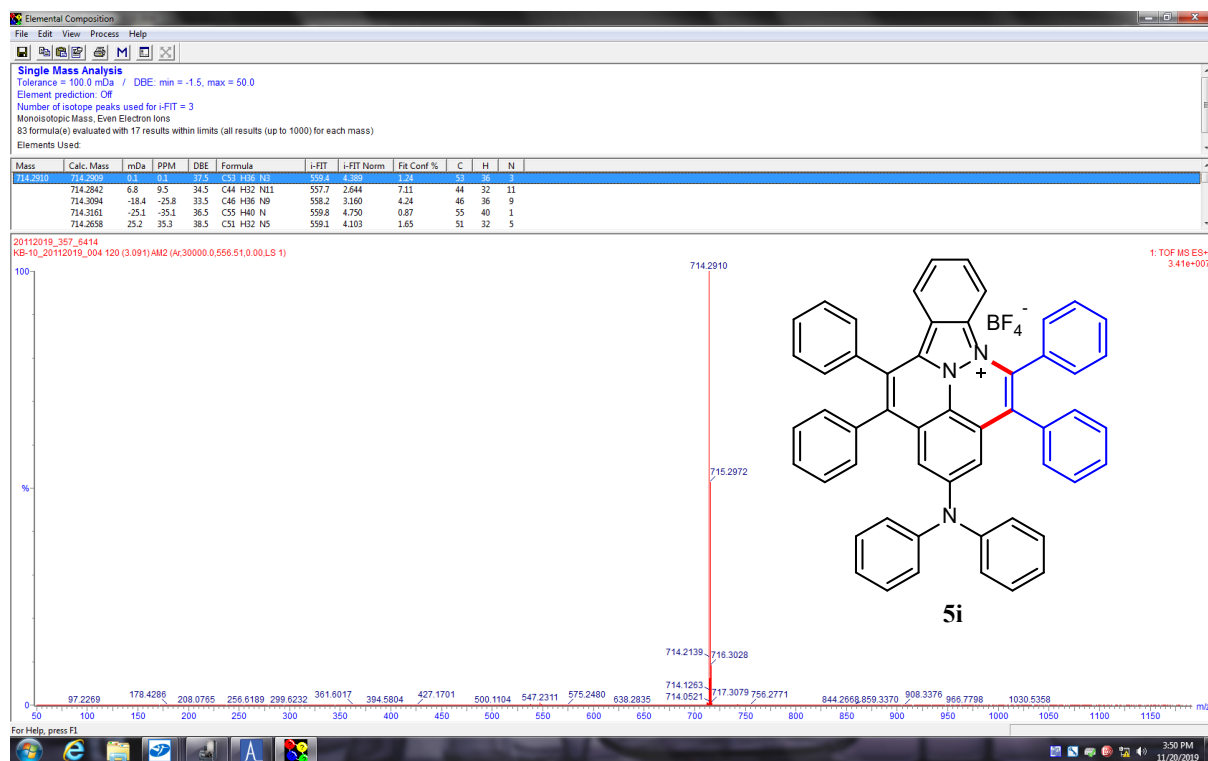

Figure S88: HRMS spectrum of compound **5i**

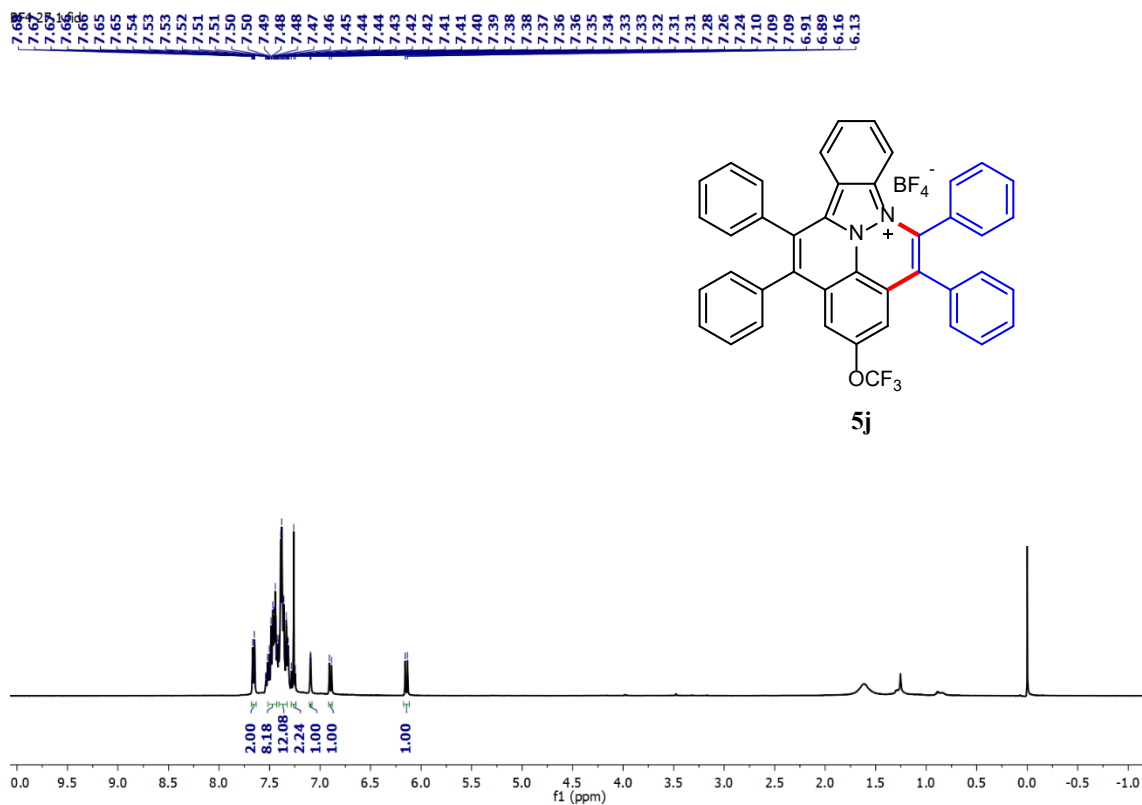

Figure S89:  $^1\text{H}$  NMR spectrum of compound **5j** in  $\text{CDCl}_3$

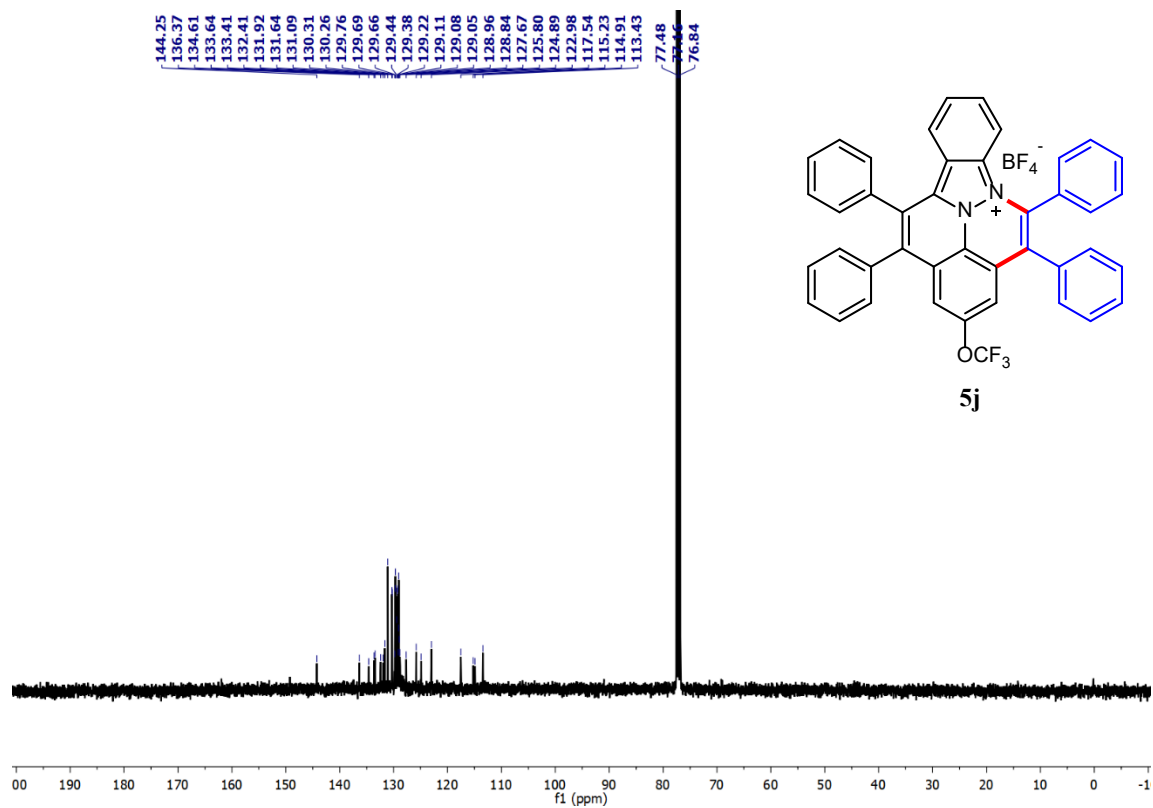

Figure S90:  $^{13}\text{C}$  NMR spectrum of compound **5j** in  $\text{CDCl}_3$

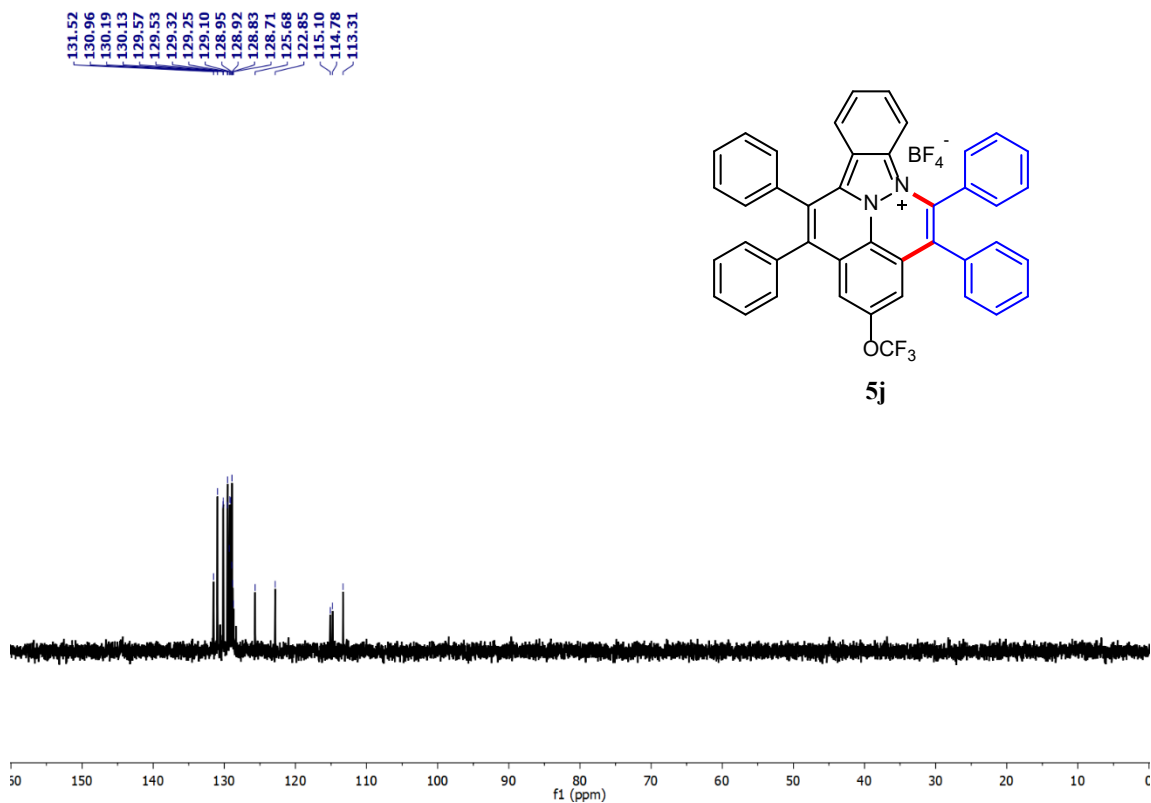

Figure S91: DEPT-135 NMR spectrum of compound **5j** in  $\text{CDCl}_3$

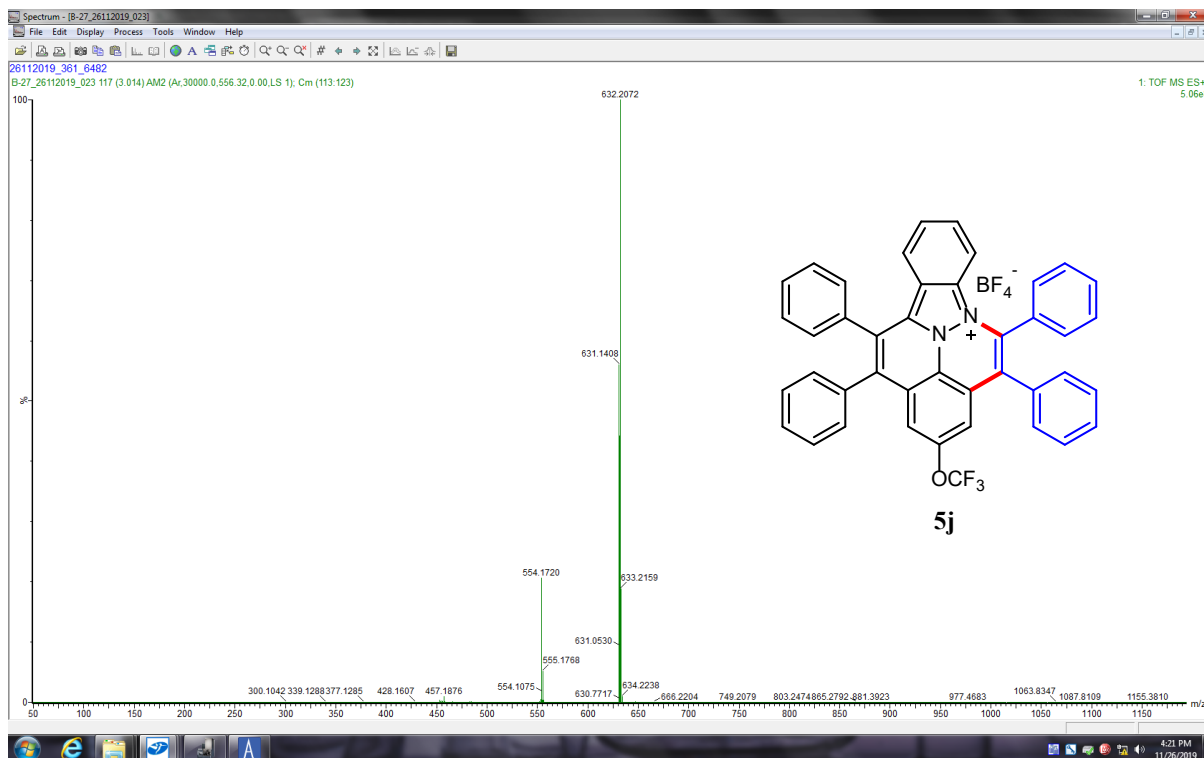

Figure S92: HRMS spectrum of compound **5j**



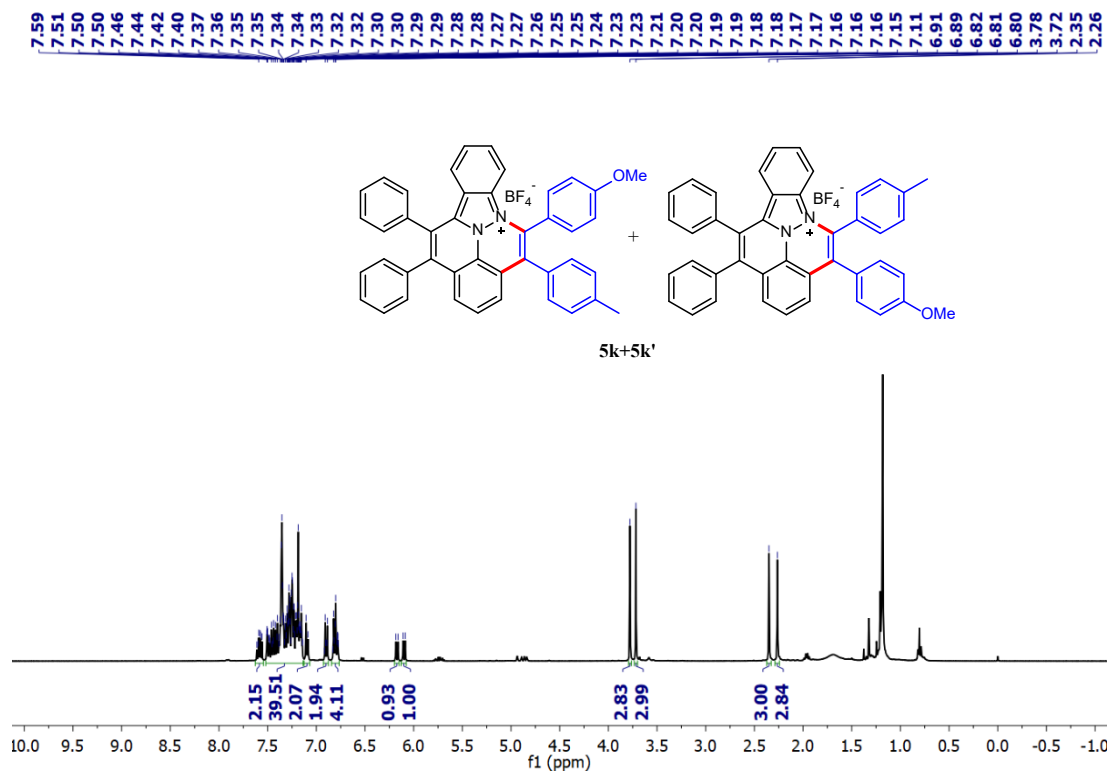

Figure S93:  $^1\text{H}$  NMR spectrum of compound **5k** in  $\text{CDCl}_3$

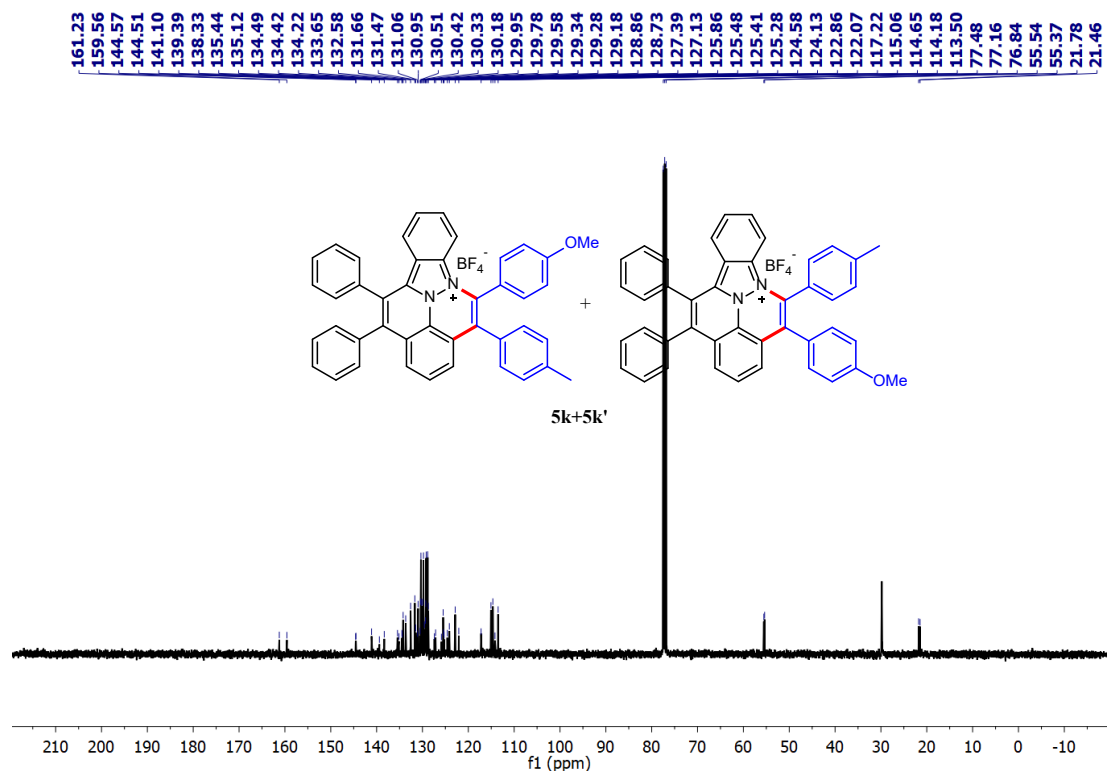

Figure S94:  $^{13}\text{C}$  NMR spectrum of compound **5k** in  $\text{CDCl}_3$

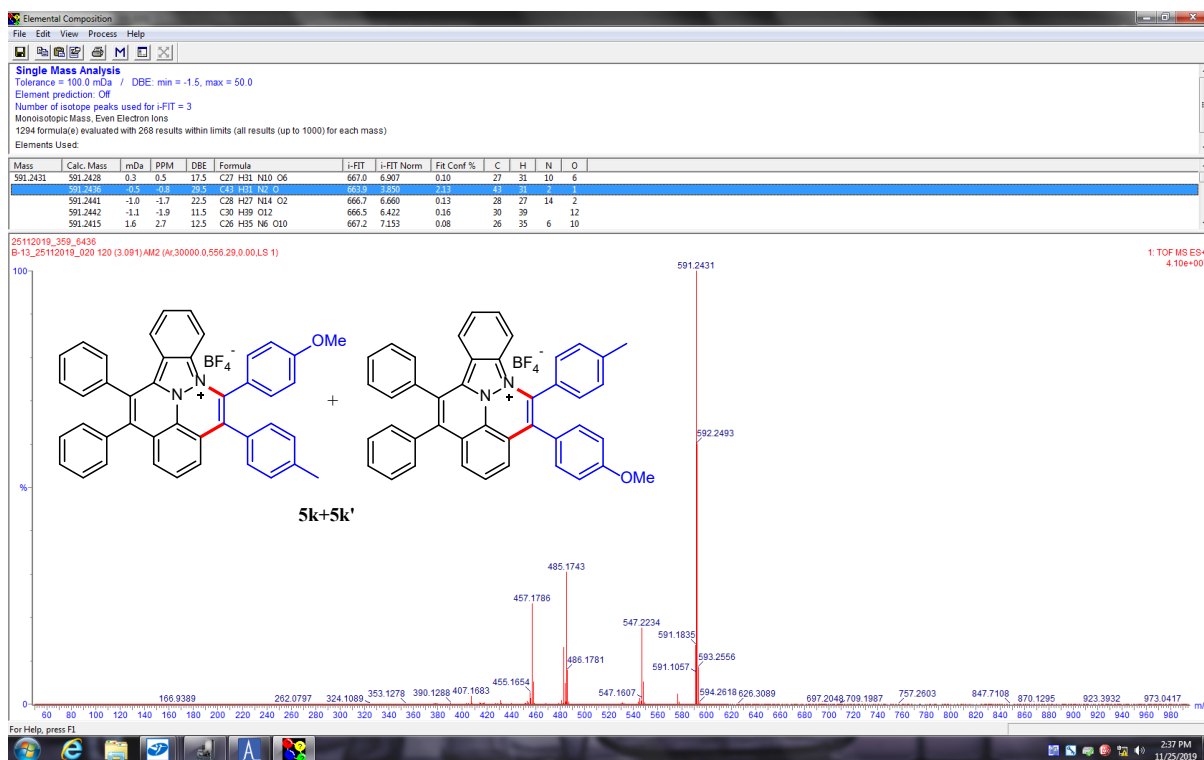

Figure S95: HRMS spectrum of compound 5k+5k'

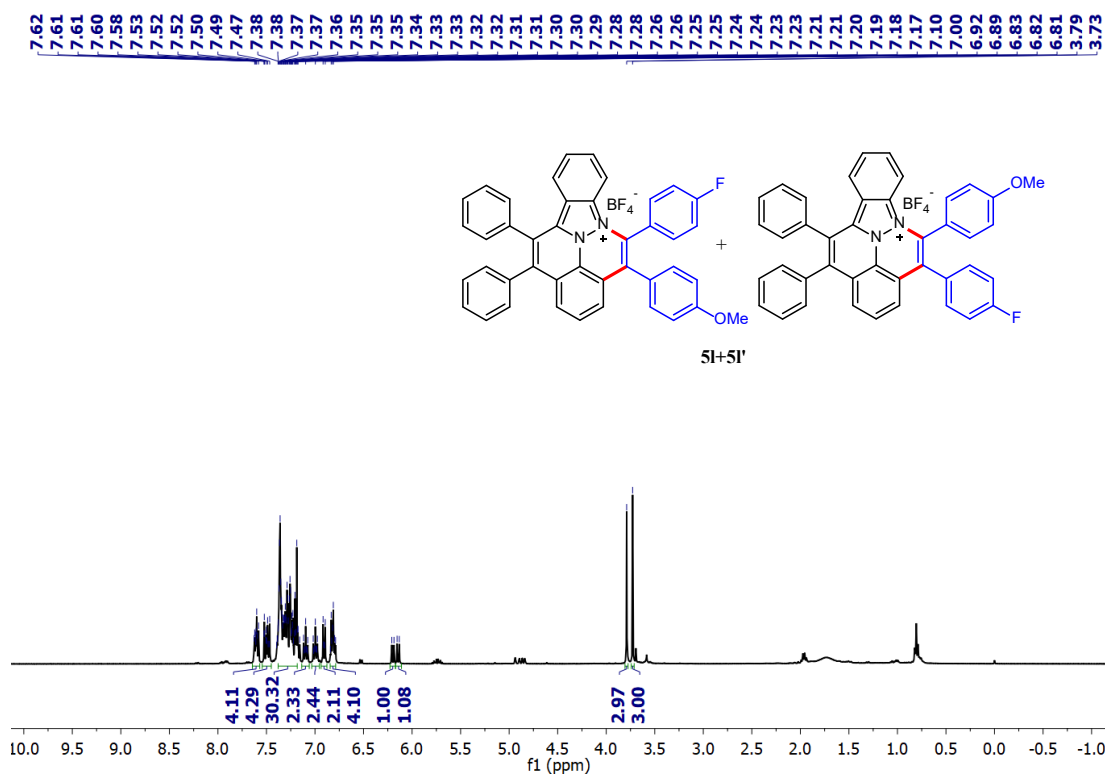

Figure S96: <sup>1</sup>H NMR spectrum of compound 5l in CDCl<sub>3</sub>

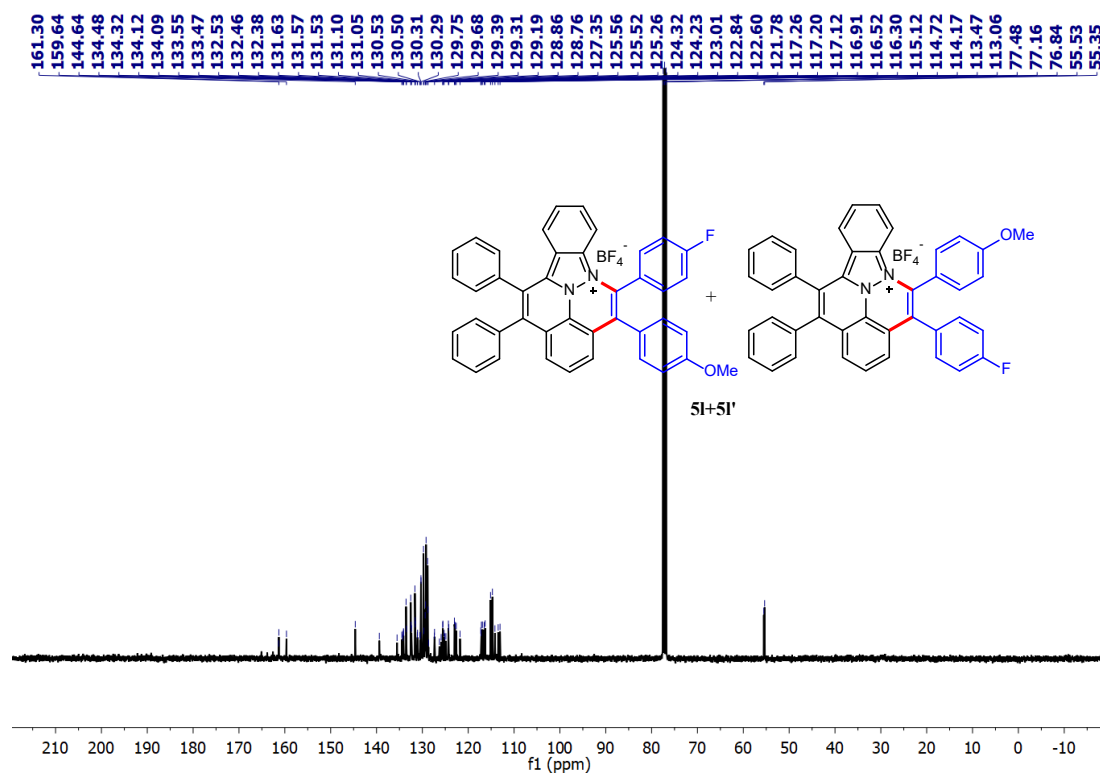

Figure S97:  $^{13}\text{C}$  NMR spectrum of compound **5I** in  $\text{CDCl}_3$

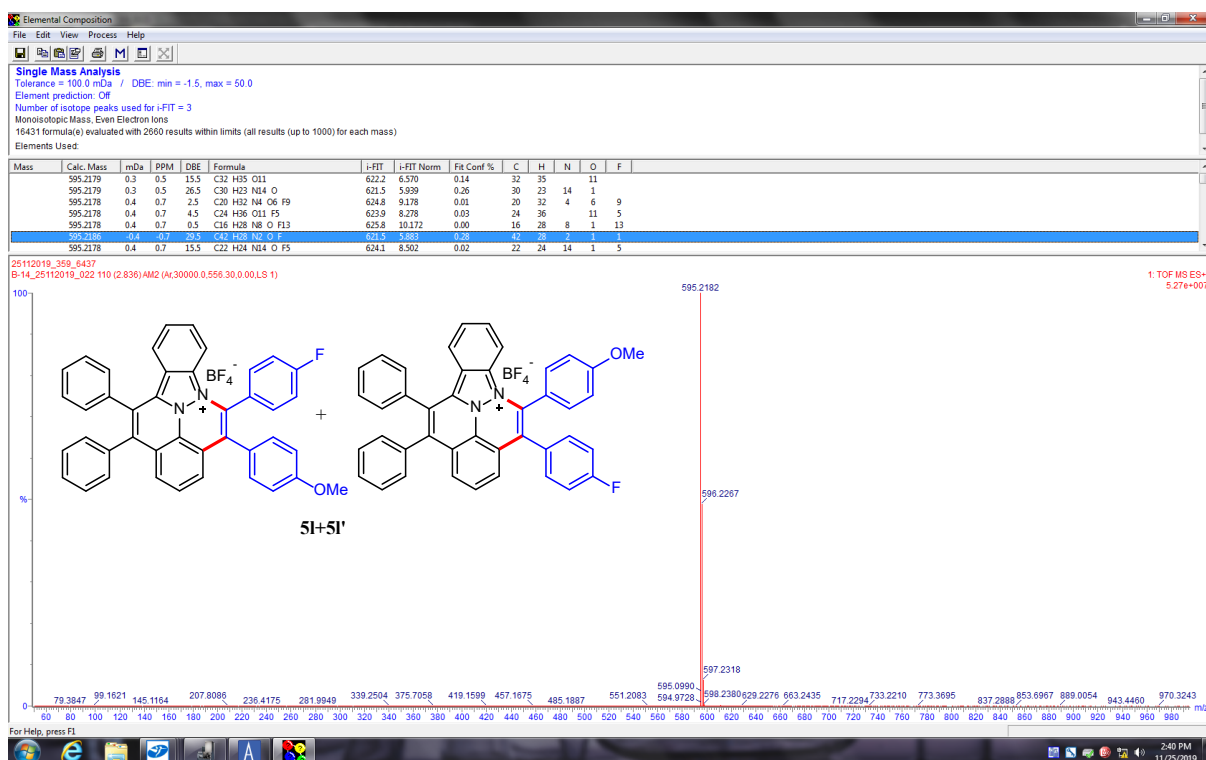

Figure S98: HRMS spectrum of compound **5I+5I'**

## 5. DFT Calculations

**Table 2. Data of DFT studies<sup>1</sup>**

| Method<br>Compound | B3LYP/6-311G* |           |          |
|--------------------|---------------|-----------|----------|
|                    | LUMO (eV)     | HOMO (eV) | Gap (eV) |
| 3a                 | -5.6346       | -9.2603   | 3.6257   |
| 3b                 | -5.6934       | -9.1038   | 3.4104   |
| 3c                 | -5.6850       | -9.0847   | 3.3997   |
| 3d                 | -5.7168       | -9.3781   | 3.6613   |
| 3e                 | -5.7206       | -9.0012   | 3.2806   |
| 3f                 | -5.8308       | -9.1160   | 3.2852   |
| 3g                 | -5.7962       | -9.3231   | 3.5269   |
| 3h                 | -5.7775       | -9.1544   | 3.3769   |
| 5a                 | -5.1511       | -8.5408   | 3.3897   |
| 5b                 | -5.1040       | -8.4167   | 3.3127   |
| 5c                 | -5.0251       | -8.1794   | 3.1543   |
| 5d                 | -5.3217       | -8.6695   | 3.3478   |
| 5e                 | -5.3013       | -8.6377   | 3.3364   |
| 5f                 | -5.0958       | -8.4758   | 3.38     |
| 5g                 | -5.0039       | -8.3479   | 3.344    |
| 5h                 | -5.0814       | -8.1149   | 3.0335   |
| 5i                 | -4.605        | -7.466    | 2.86     |
| 5j                 | -5.31873      | -8.6741   | 3.3553   |
| 5k                 | -5.0436       | -8.3190   | 3.2754   |
| 5k'                | -5.12689      | -8.48288  | 3.3559   |
| 5l                 | -5.2531       | -8.5745   | 3.3214   |
| 5l'                | -5.2466       | -8.5773   | 3.3307   |

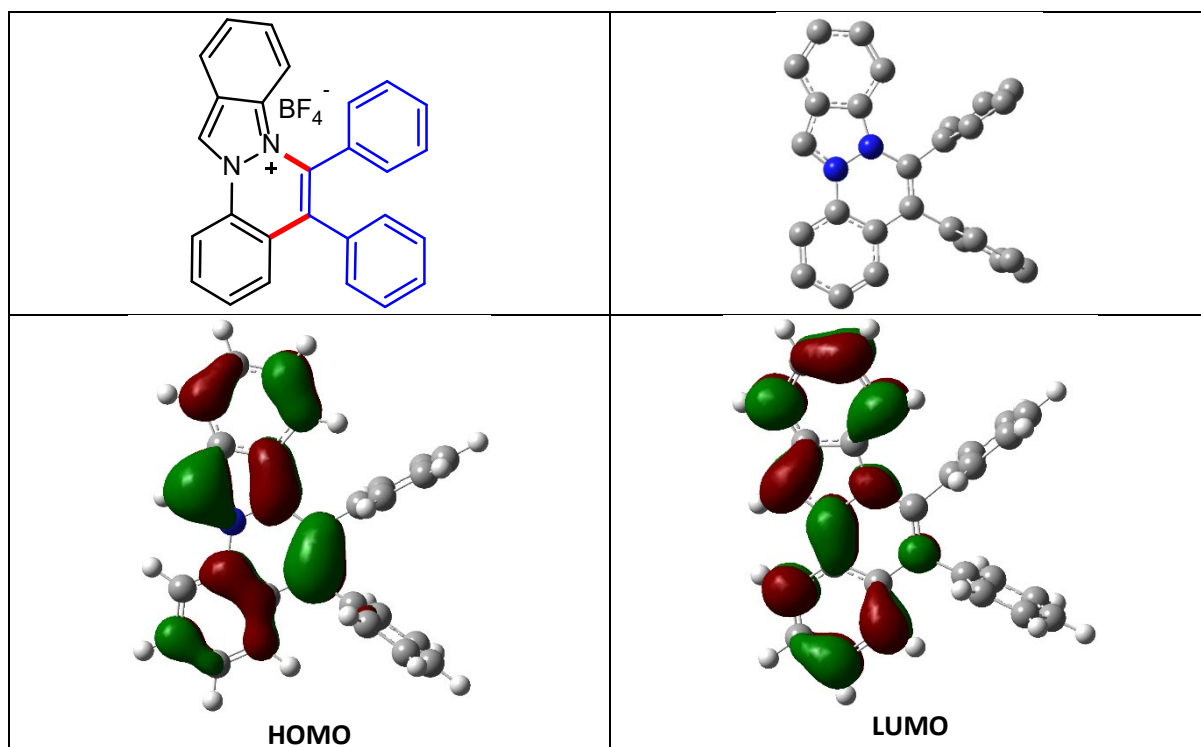

**Figure S99:** HOMO-LUMO of the compound **3a**

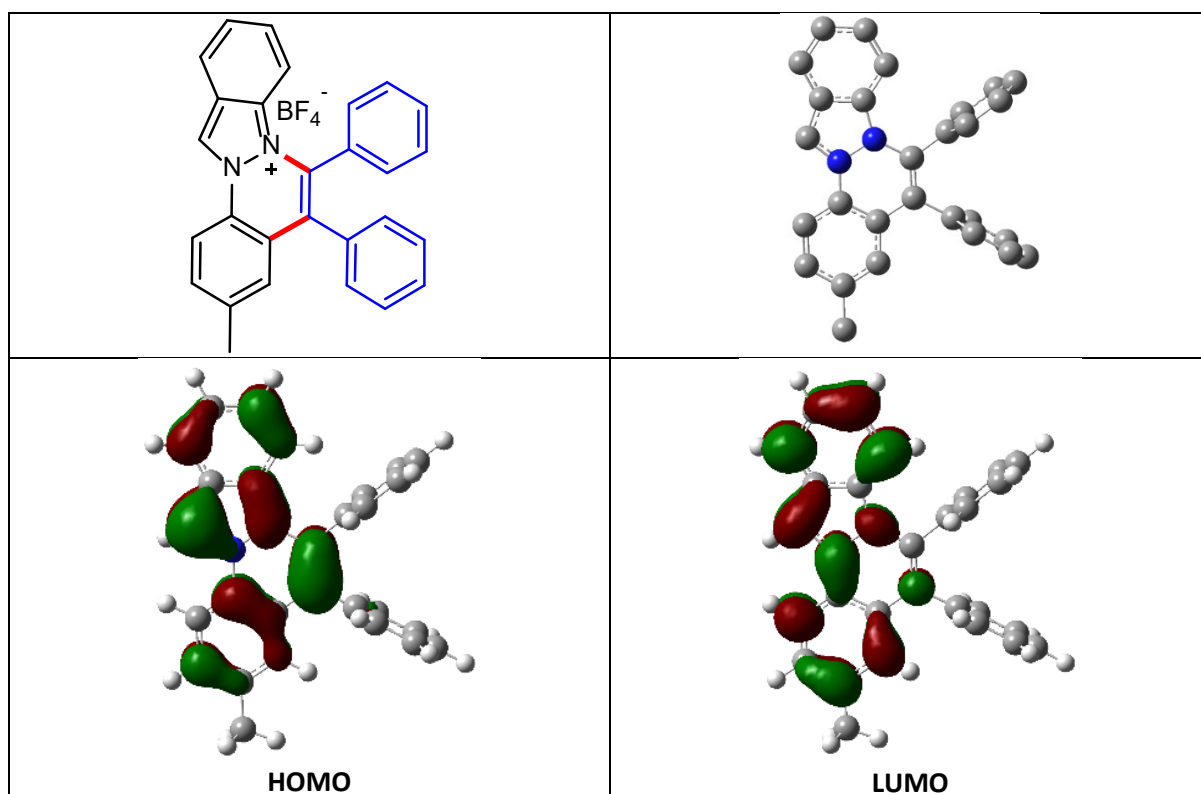

**Figure S100:** HOMO-LUMO of the compound **3b**

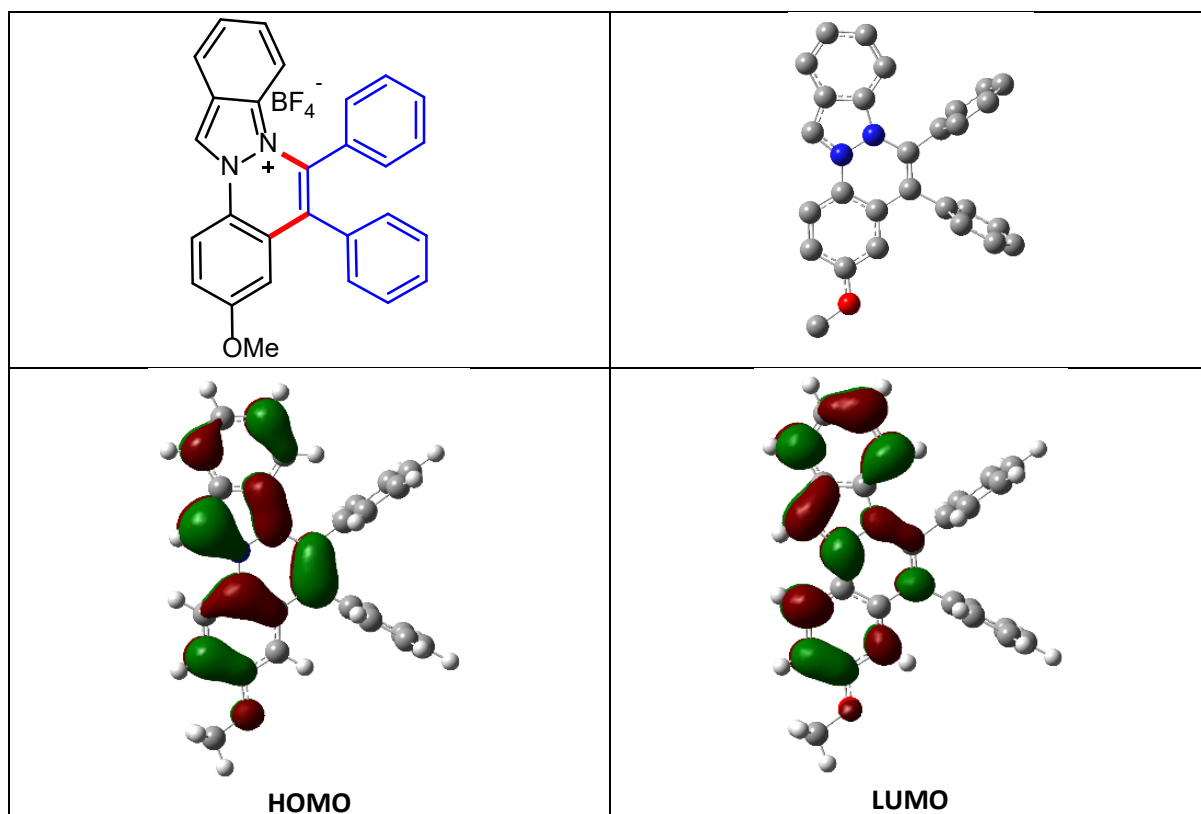

Figure S101: HOMO-LUMO of the compound 3c

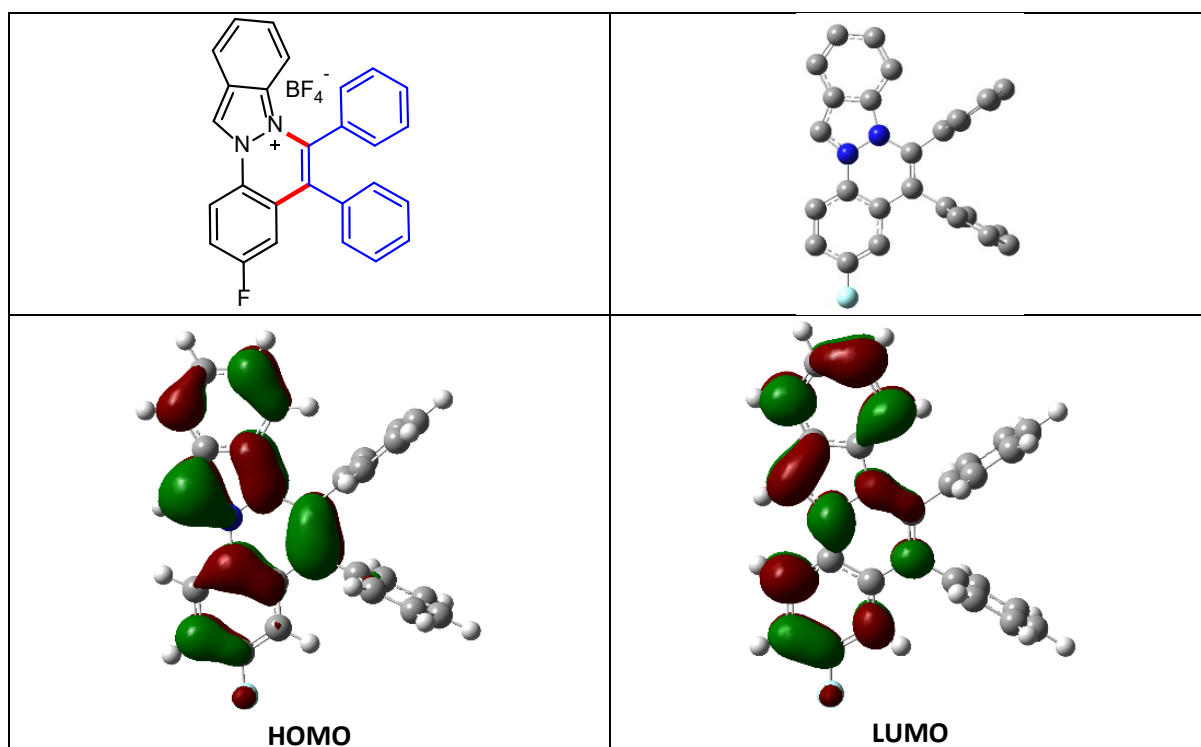

Figure S102: HOMO-LUMO of the compound 3d

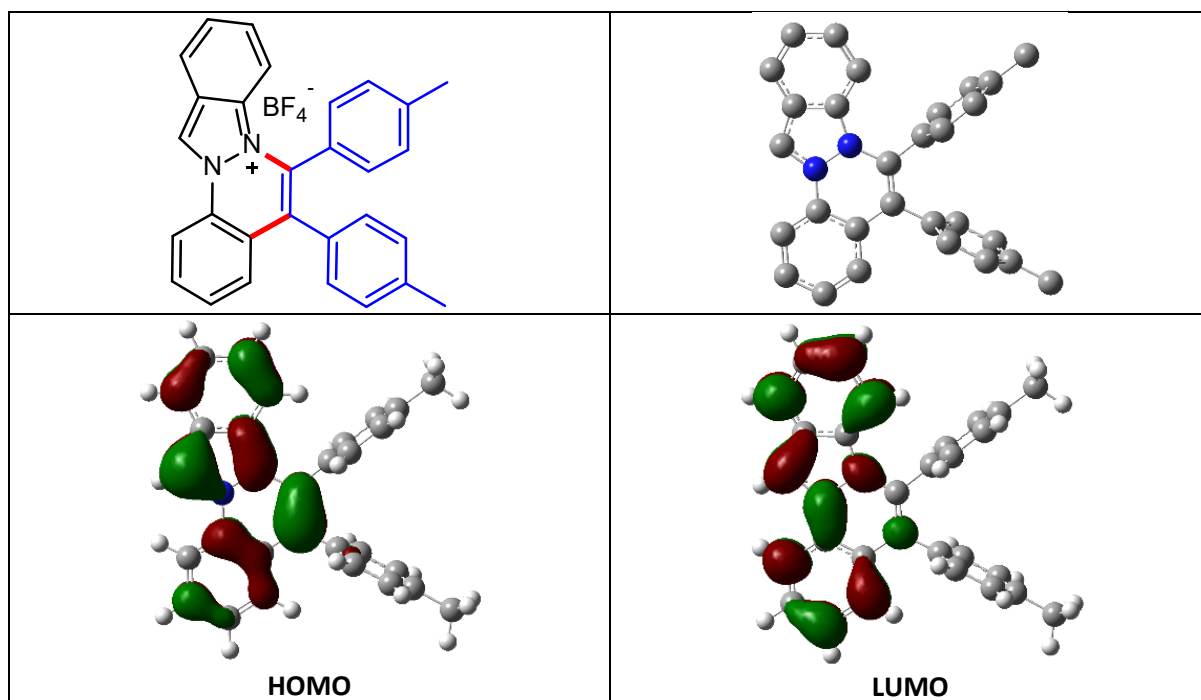

Figure S103: HOMO-LUMO of the compound 3e

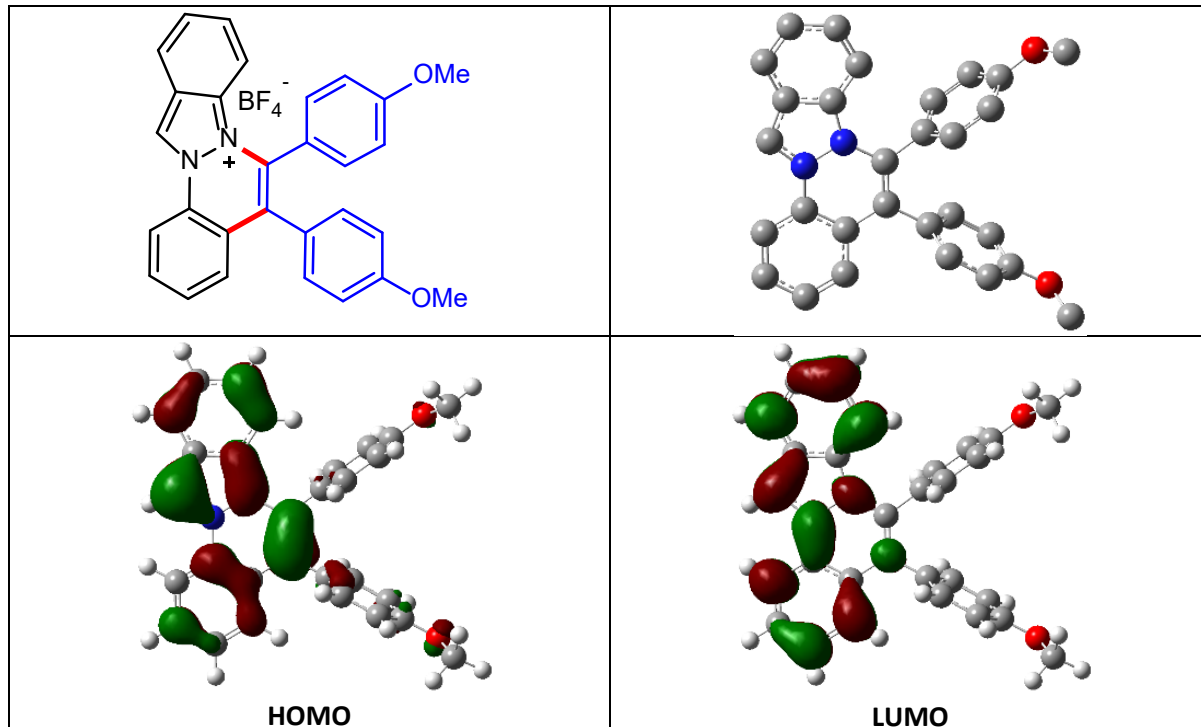

Figure S104: HOMO-LUMO of the compound 3f

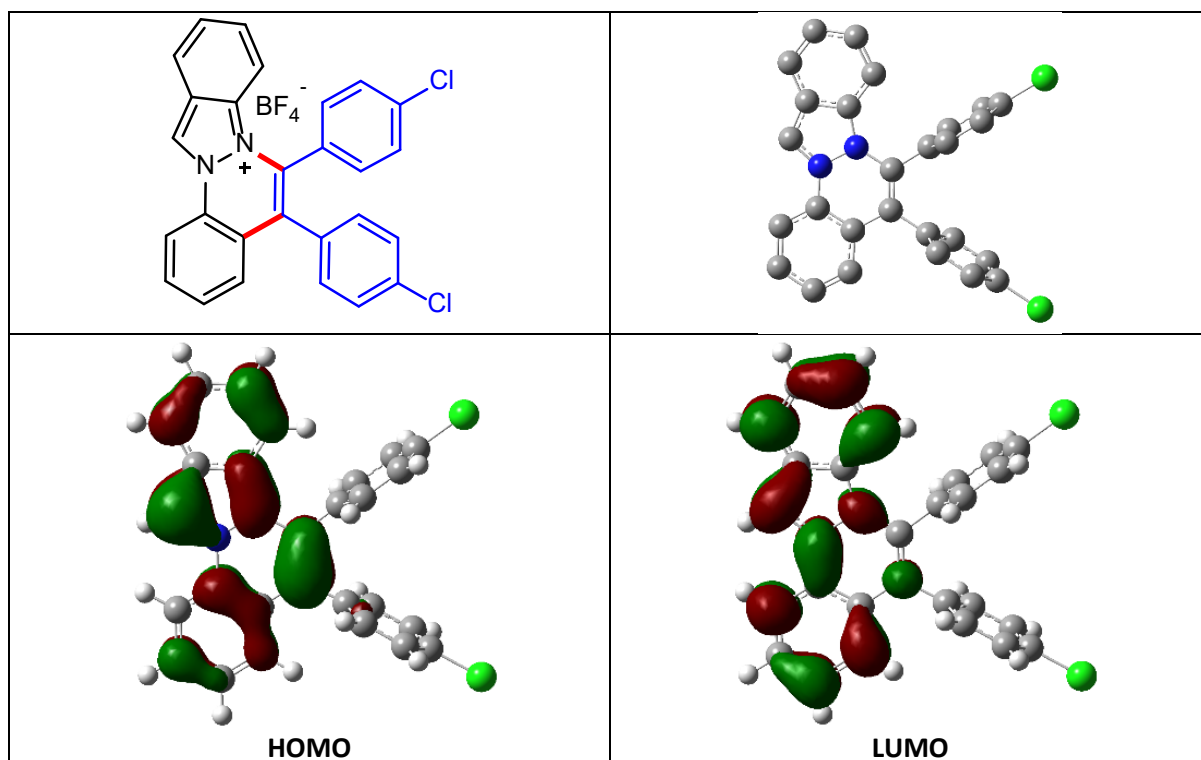

**Figure S105:** HOMO-LUMO of the compound **3g**

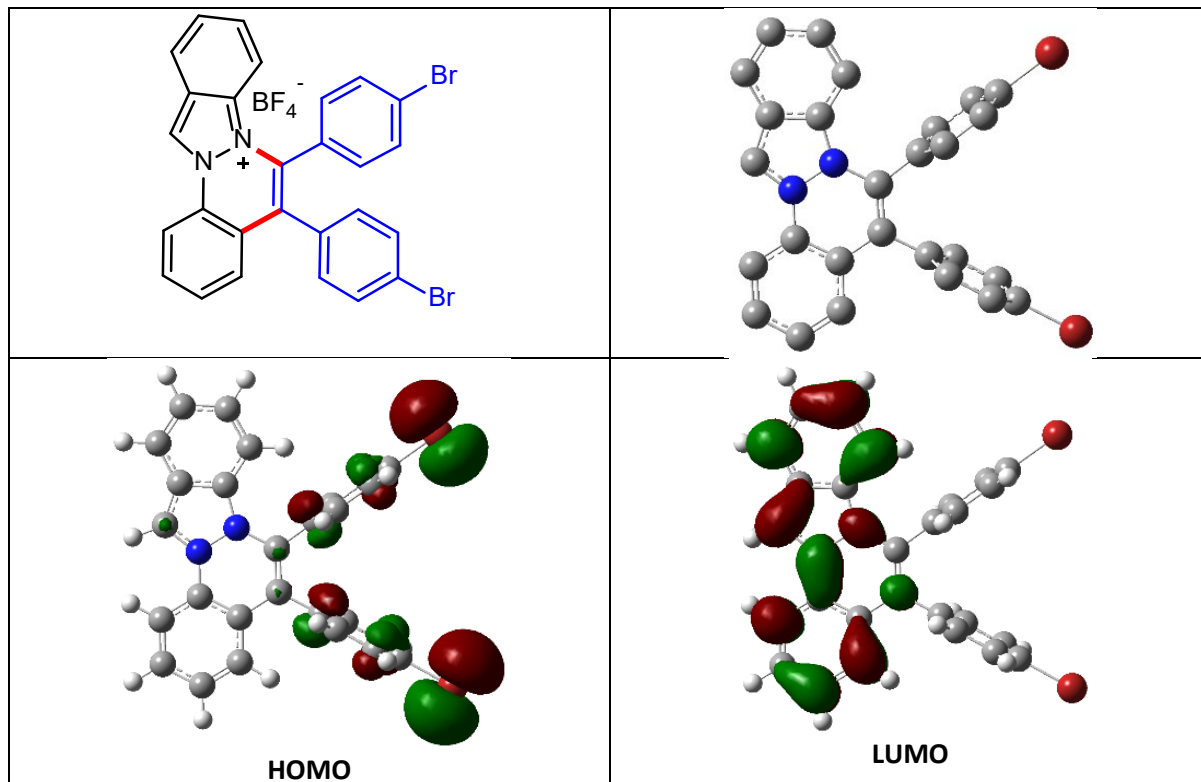

**Figure S106:** HOMO-LUMO of the compound **3h**



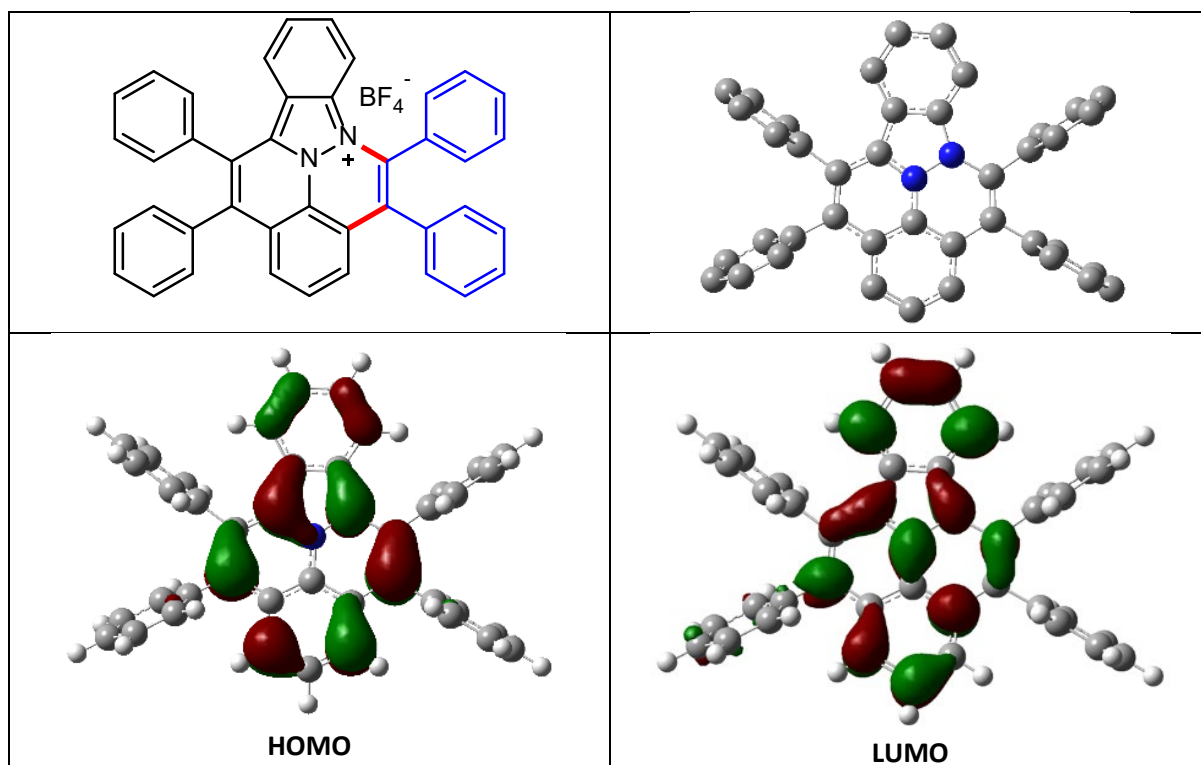

Figure S107: HOMO-LUMO of the compound 5a

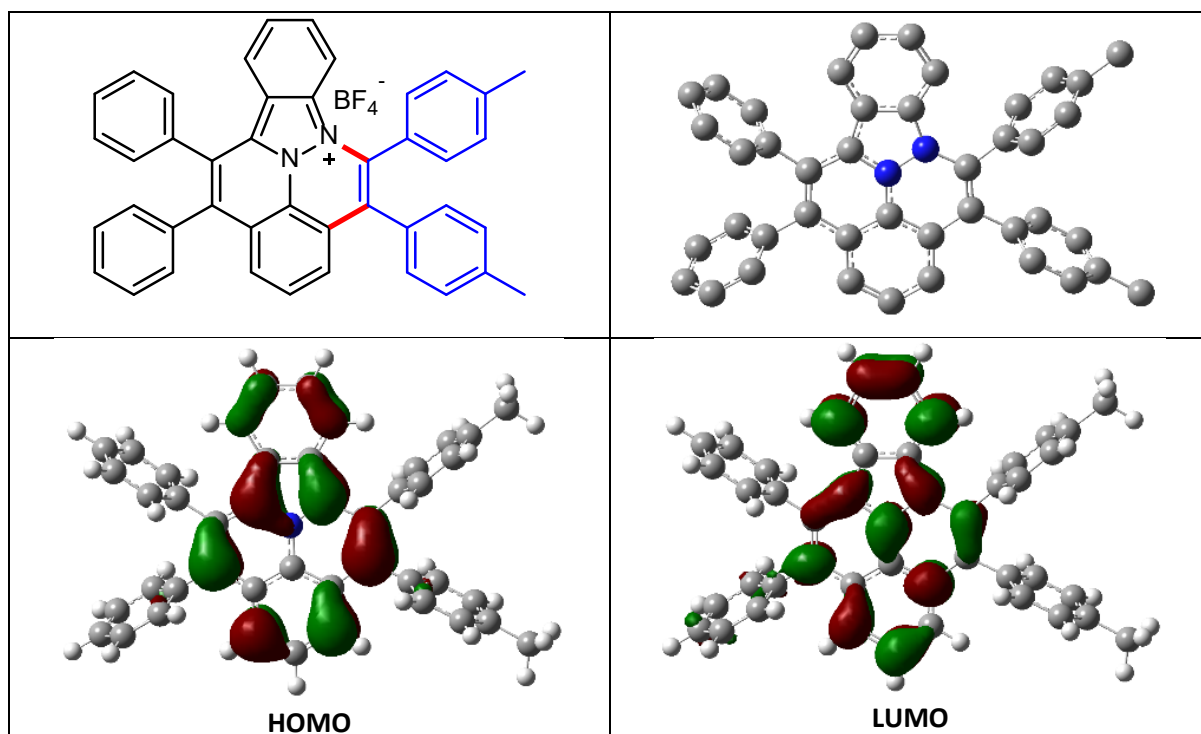

Figure S108: HOMO-LUMO of the compound 5b

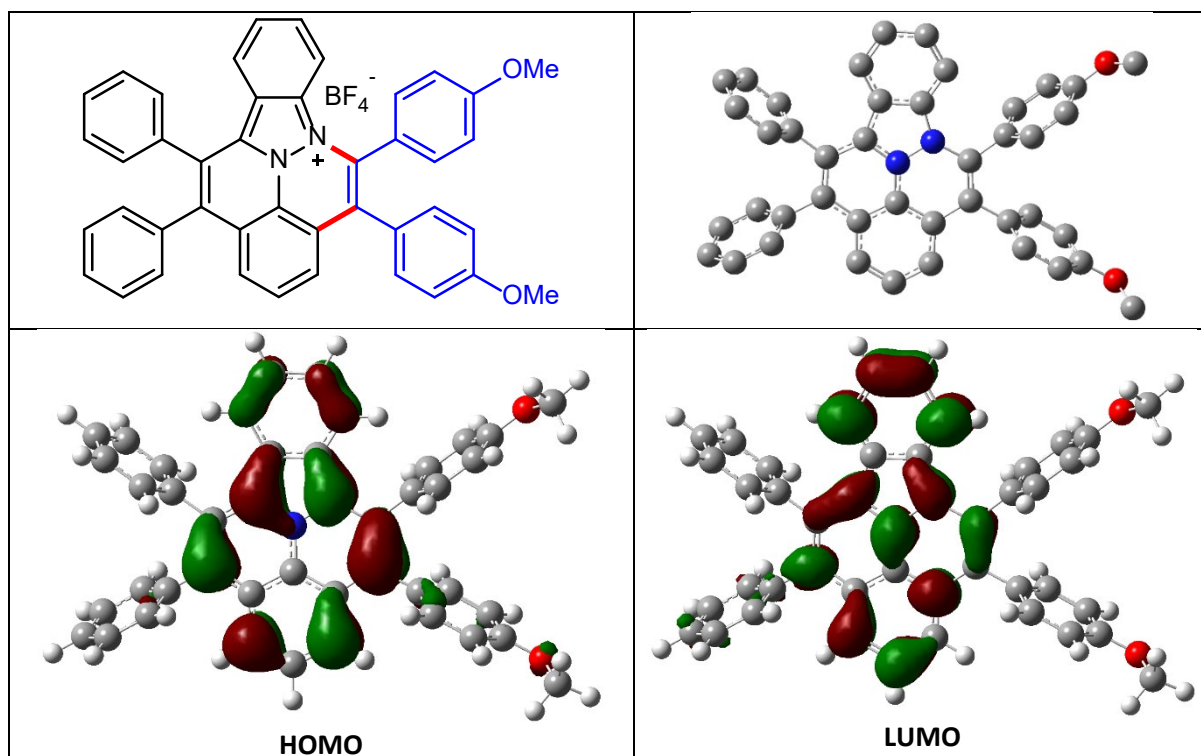

Figure S109: HOMO-LUMO of the compound 5c

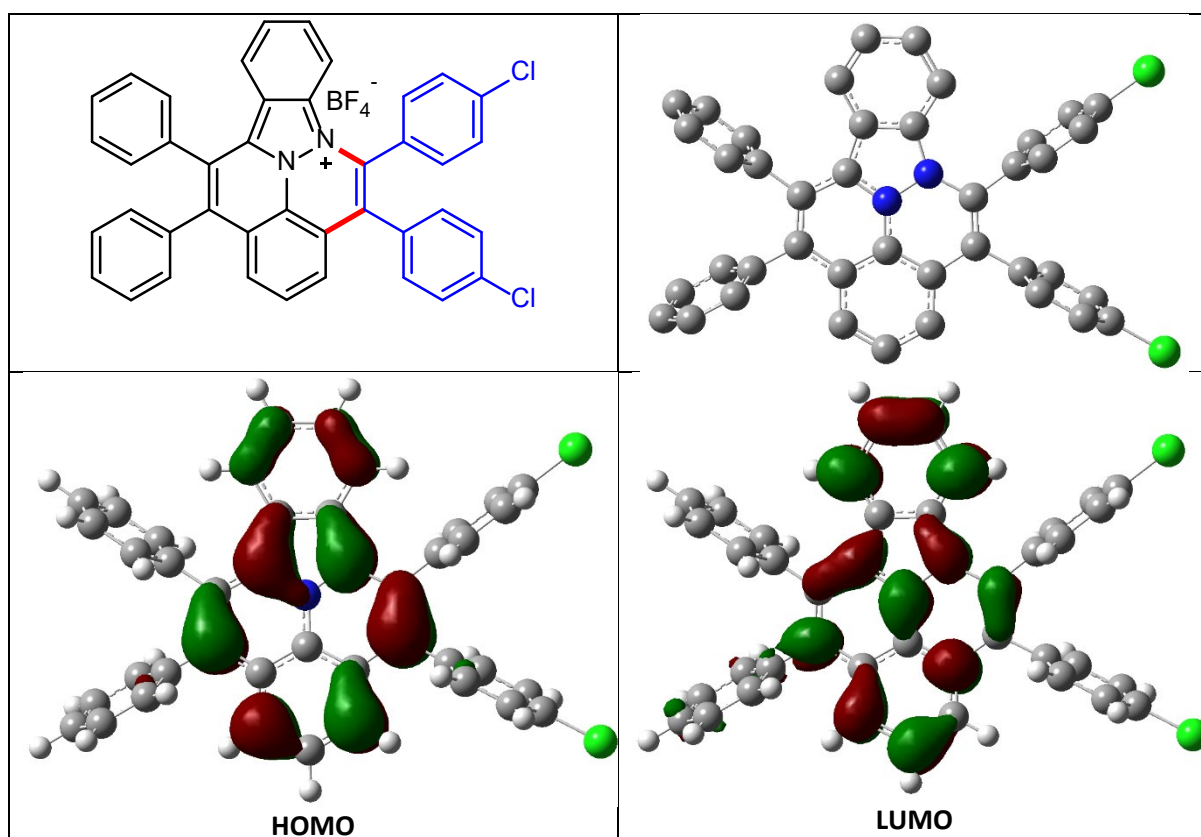

Figure S110: HOMO-LUMO of the compound 5d

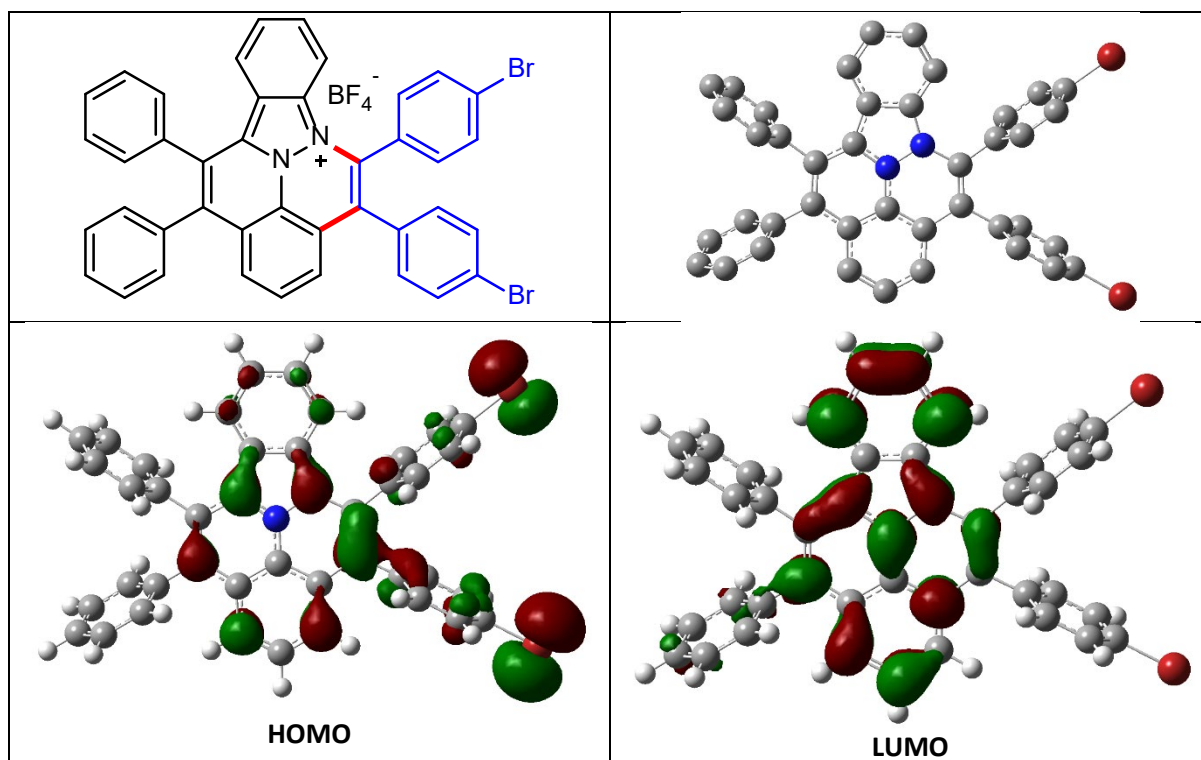

Figure S111: HOMO-LUMO of the compound 5e

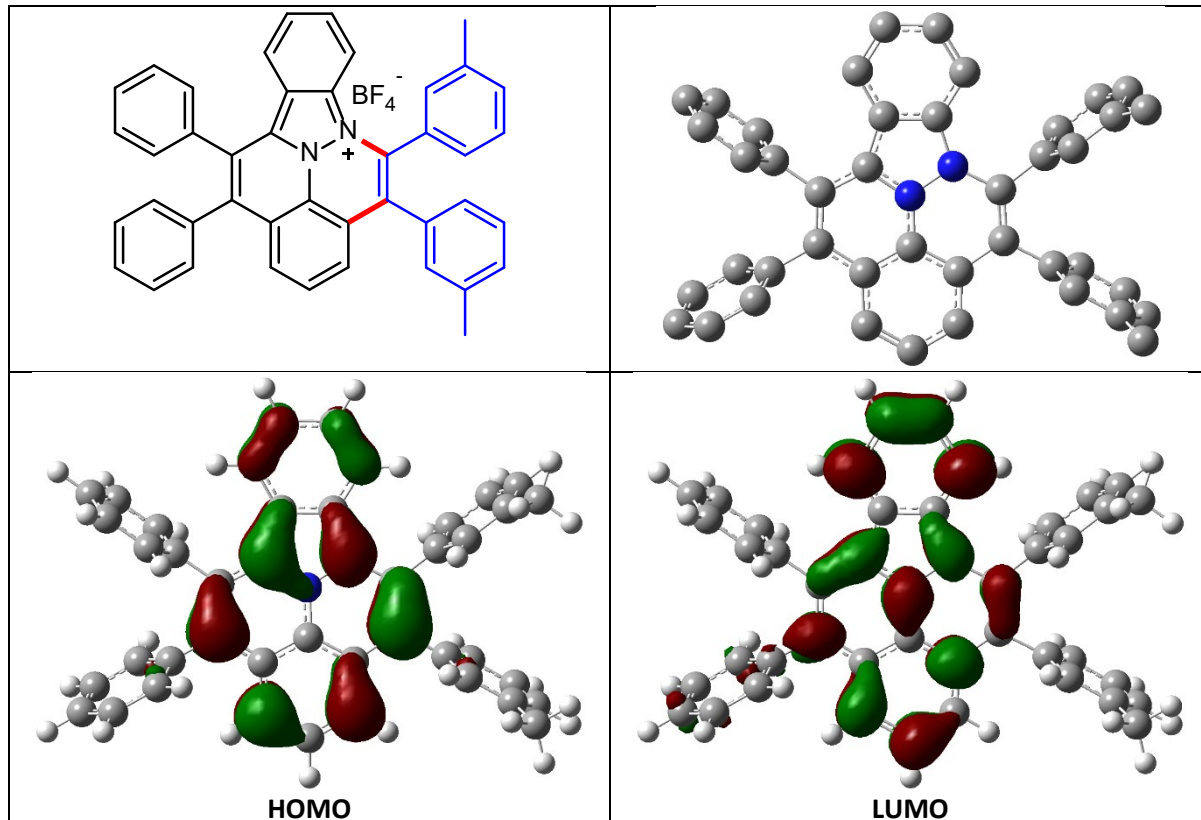

Figure S112: HOMO-LUMO of the compound 5f

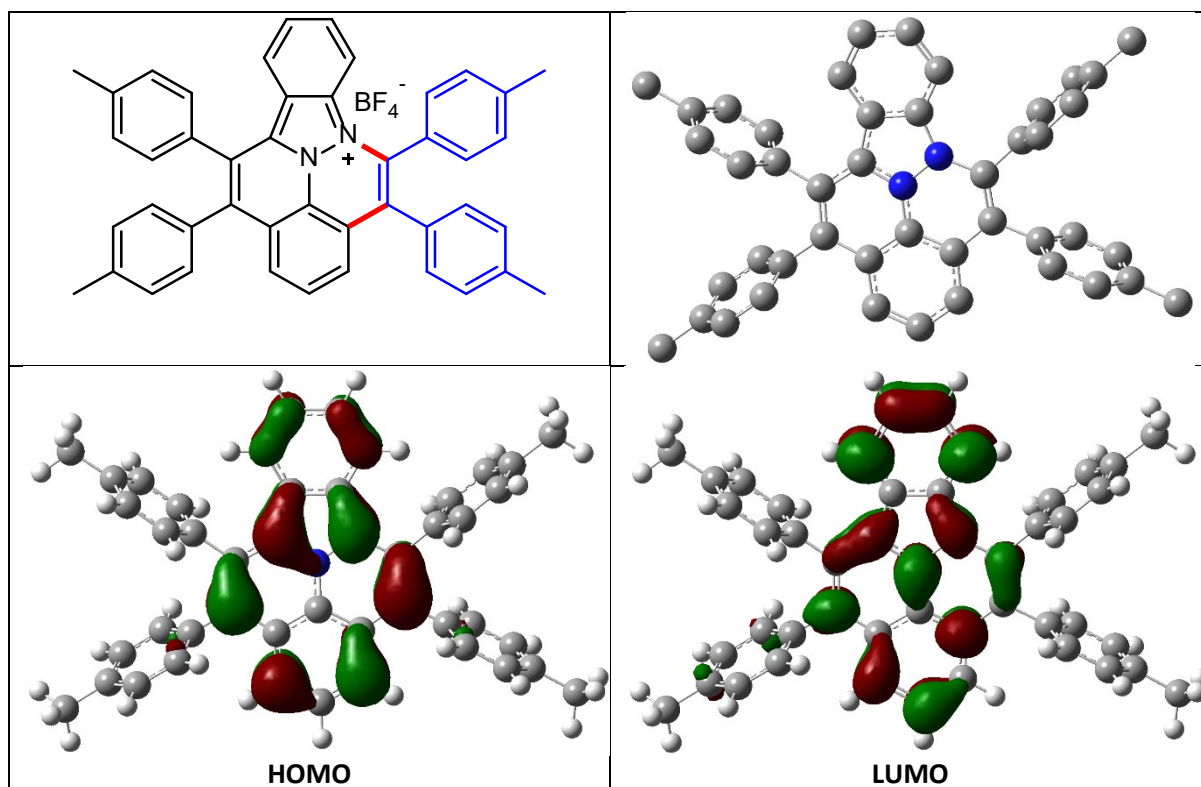

Figure S113: HOMO-LUMO of the compound 5g

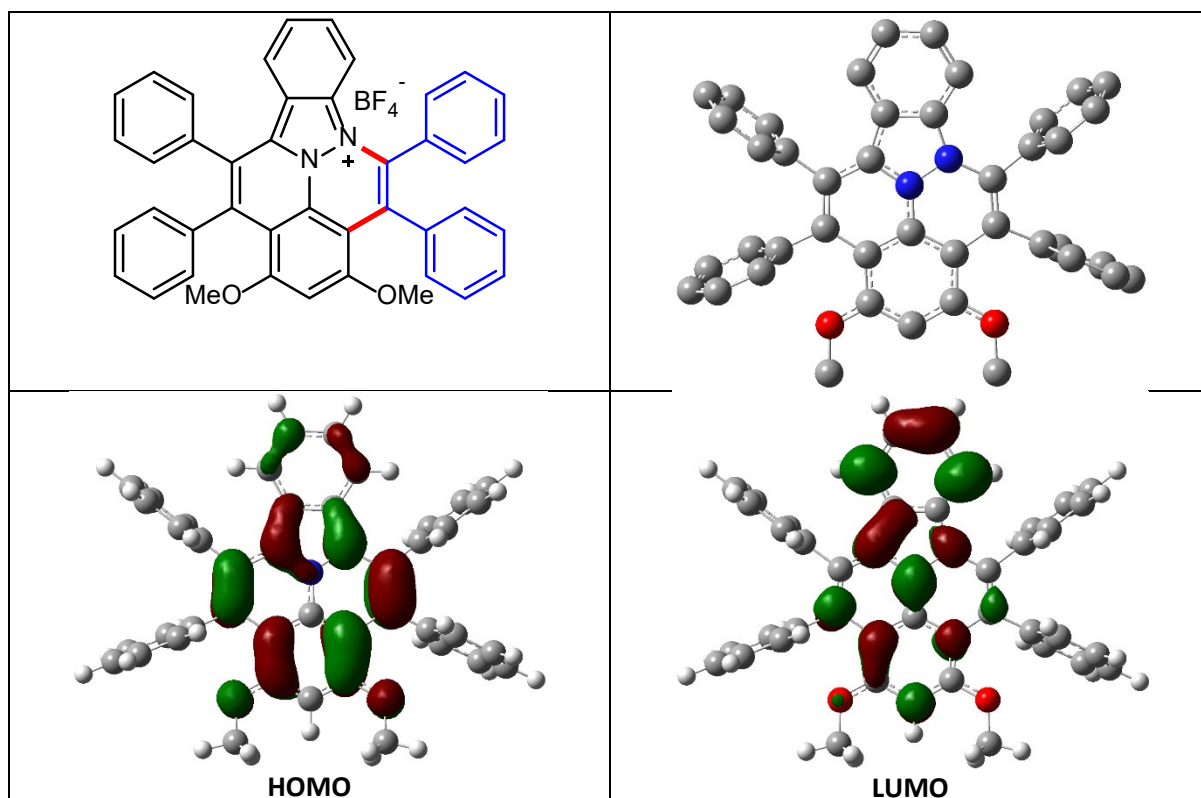

Figure S114: HOMO-LUMO of the compound 5h

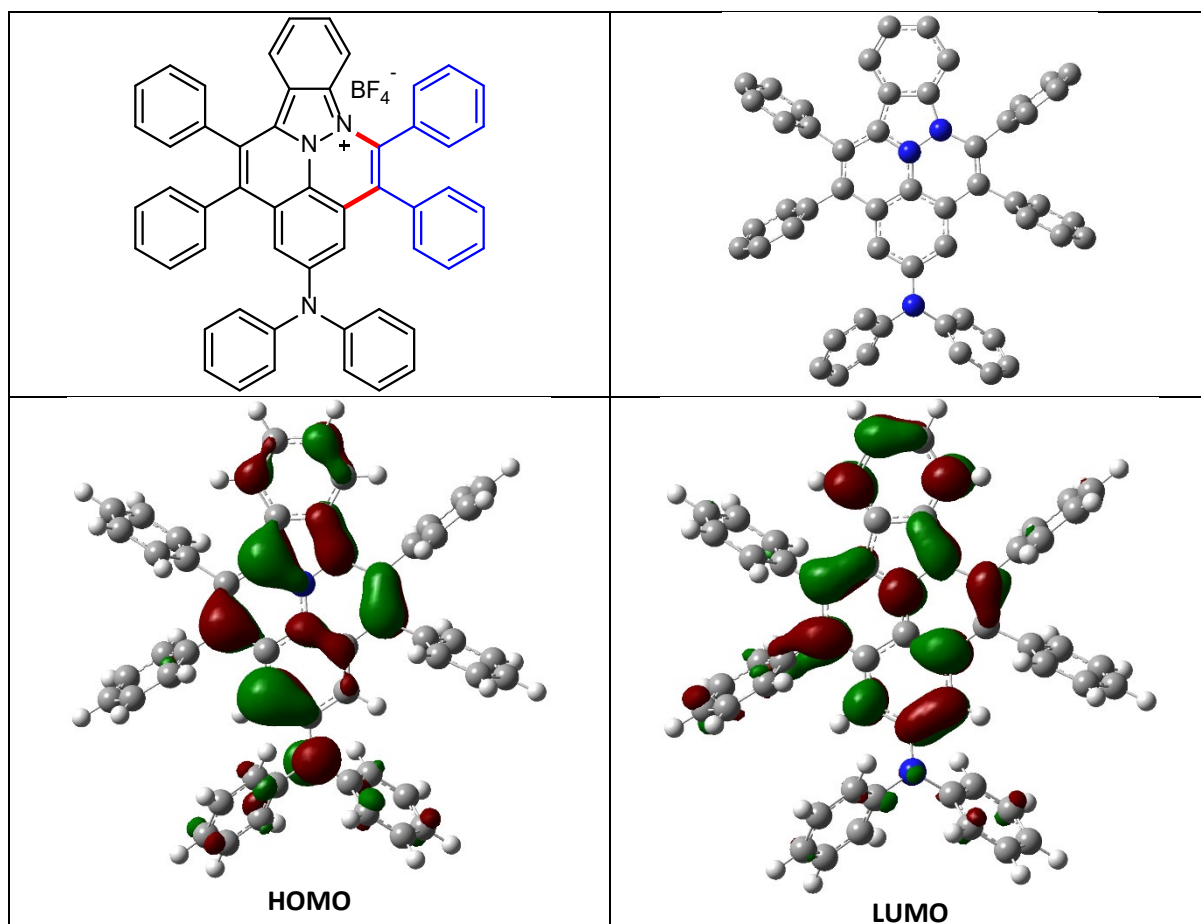

Figure S115: HOMO-LUMO of the compound 5i

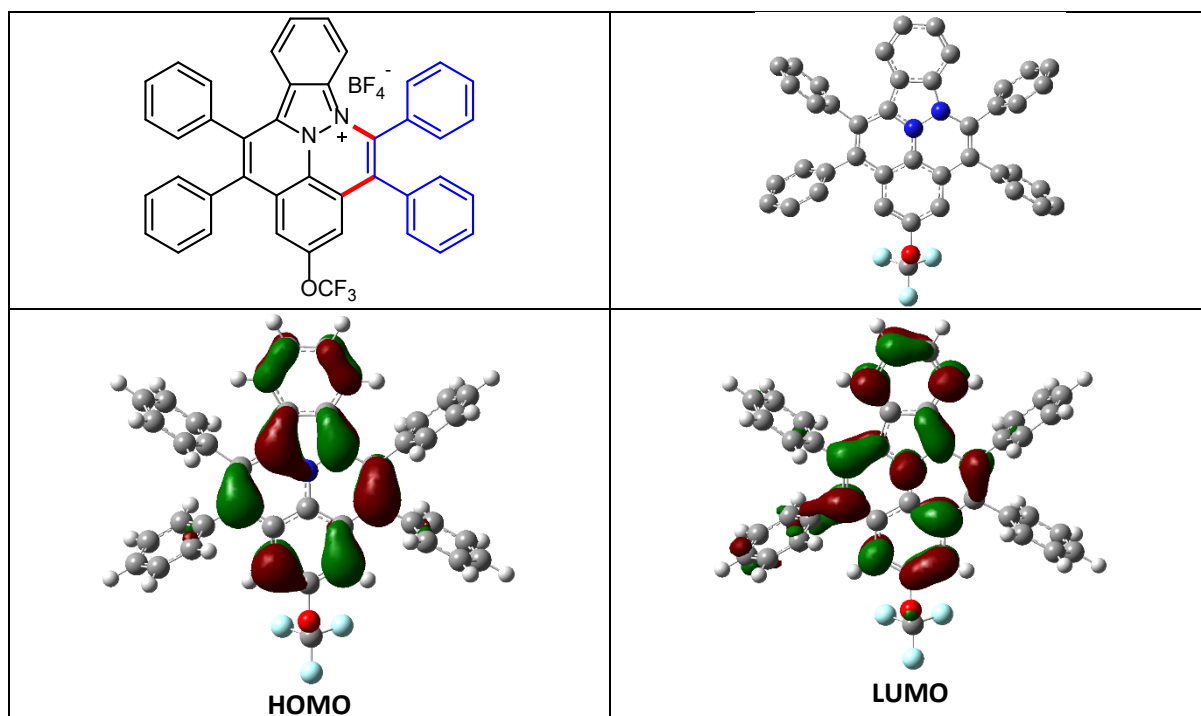

Figure S116: HOMO-LUMO of the compound 5j



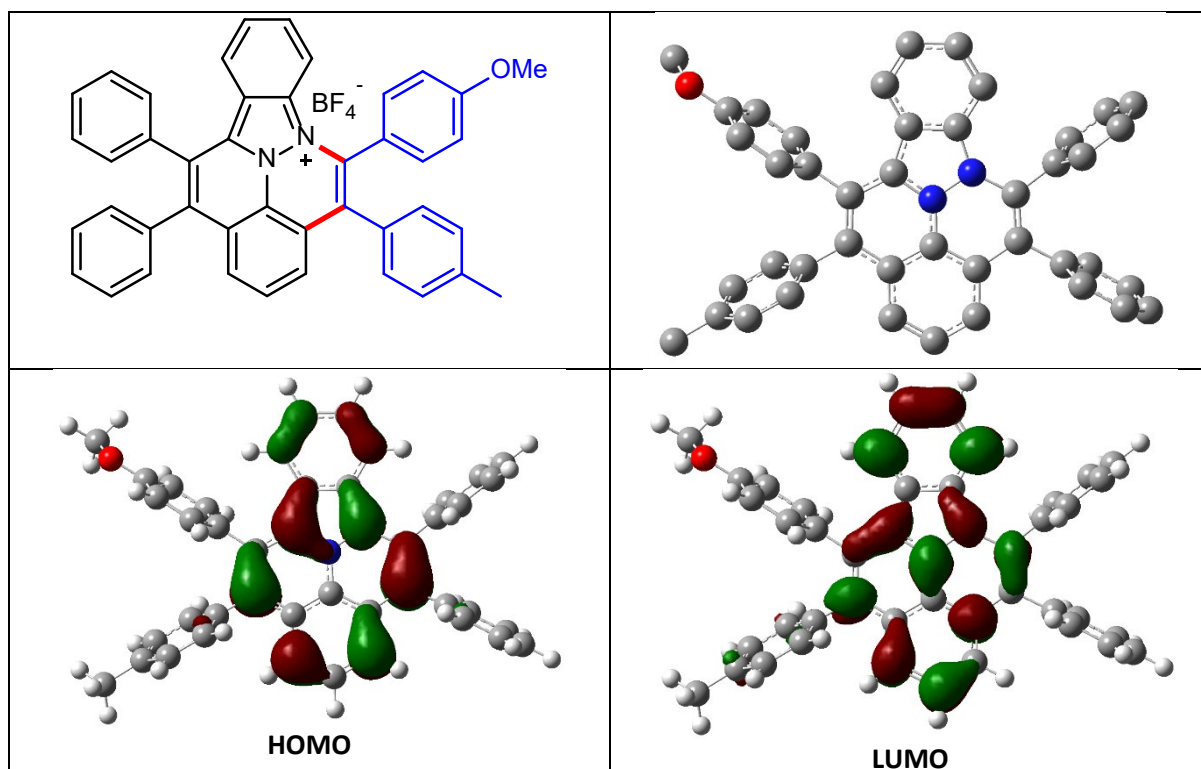

Figure S117: HOMO-LUMO of the compound 5k

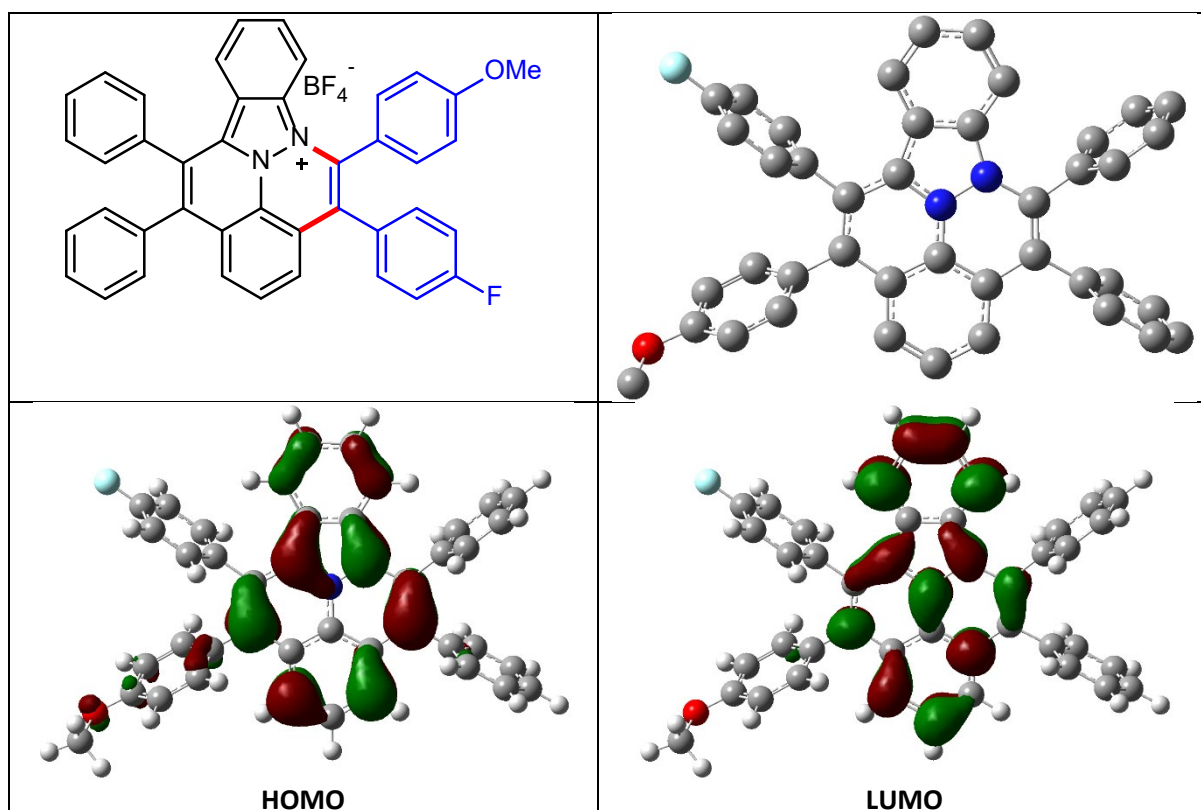

Figure S118: HOMO-LUMO of the compound 5l

## 6. Reference

1. Gaussian 16, Revision **C.01**, M. J. Frisch, G. W. Trucks, H. B. Schlegel, G. E. Scuseria, M. A. Robb, J. R. Cheeseman, G. Scalmani, V. Barone, G. A. Petersson, H. Nakatsuji, X. Li, M. Caricato, A. V. Marenich, J. Bloino, B. G. Janesko, R. Gomperts, B. Mennucci, H. P. Hratchian, J. V. Ortiz, A. F. Izmaylov, J. L. Sonnenberg, D. Williams-Young, F. Ding, F. Lipparini, F. Egidi, J. Goings, B. Peng, A. Petrone, T. Henderson, D. Ranasinghe, V. G. Zakrzewski, J. Gao, N. Rega, G. Zheng, W. Liang, M. Hada, M. Ehara, K. Toyota, R. Fukuda, J. Hasegawa, M. Ishida, T. Nakajima, Y. Honda, O. Kitao, H. Nakai, T. Vreven, K. Throssell, J. A. Montgomery, Jr., J. E. Peralta, F. Ogliaro, M. J. Bearpark, J. J. Heyd, E. N. Brothers, K. N. Kudin, V. N. Staroverov, T. A. Keith, R. Kobayashi, J. Normand, K. Raghavachari, A. P. Rendell, J. C. Burant, S. S. Iyengar, J. Tomasi, M. Cossi, J. M. Millam, M. Klene, C. Adamo, R. Cammi, J. W. Ochterski, R. L. Martin, K. Morokuma, O. Farkas, J. B. Foresman, and D. J. Fox, Gaussian, Inc., Wallingford CT, **2016**.
